# Supplementary material for: High Rate of Recent Intron Gain and Loss in Simultaneously Duplicated Arabidopsis Genes
Source: Oxford University Press journal article supplement (doi:10.1093/molbev/msl017), 2006-05-23
Supplement: msl017_Supplementary_Data.zip [file msl017_Supplementary_Data.zip]

Archive with 3 entries (3 files):
- msl017SuppTable1.pdf
- msl017SuppTable2.pdf
- msl017SuppFigures.pdf
