# Supplementary material for: High Rate of Recent Intron Gain and Loss in Simultaneously Duplicated Arabidopsis Genes
Source: Oxford University Press journal article supplement (doi:10.1093/molbev/msl017), 2006-05-23

Supplementary figures to accompany Knowles and McLysaght “High rate of recent intron gain and loss in simultaneously duplicated Arabidopsis genes”

**Supplementary Figure 1:** The relationship of intron gains and losses to the expression level of the gene. Expression levels of all Arabidopsis genes were binned into equal-sized categories. **A-C** Growth chamber expression levels in leaf, stem and flower respectively. **D-F** Greenhouse expression levels in leaf, stem and flower respectively.

Gonzalez Knowles and McLysaght; Supplementary Figure 1

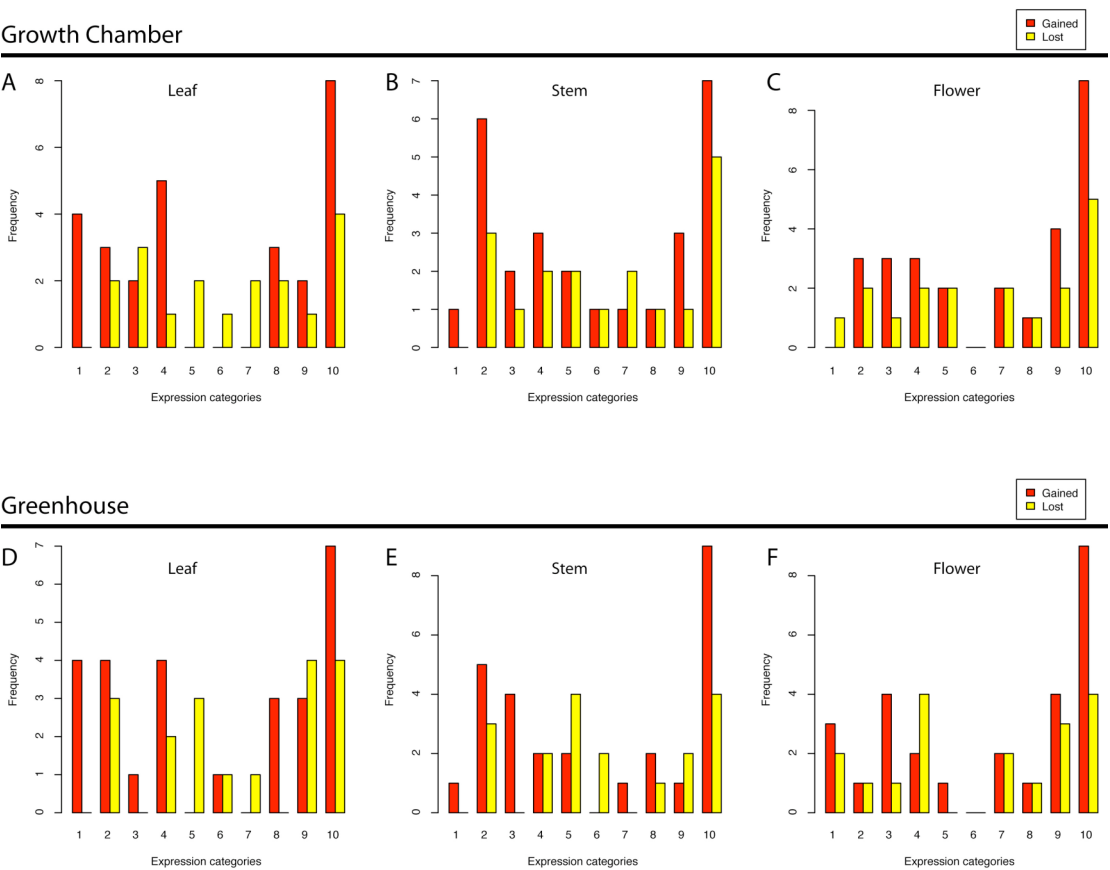

**Supplementary Figure 2:** Relationship of intron fate to relative location with the gene. **A** Absolute frequencies of intron gain and loss events at different relative intra-genic locations. **B** Relative frequencies of conserved introns, gained introns, lost introns, other non-conserved introns, and unassigned introns (ambiguous alignment) within the gene.

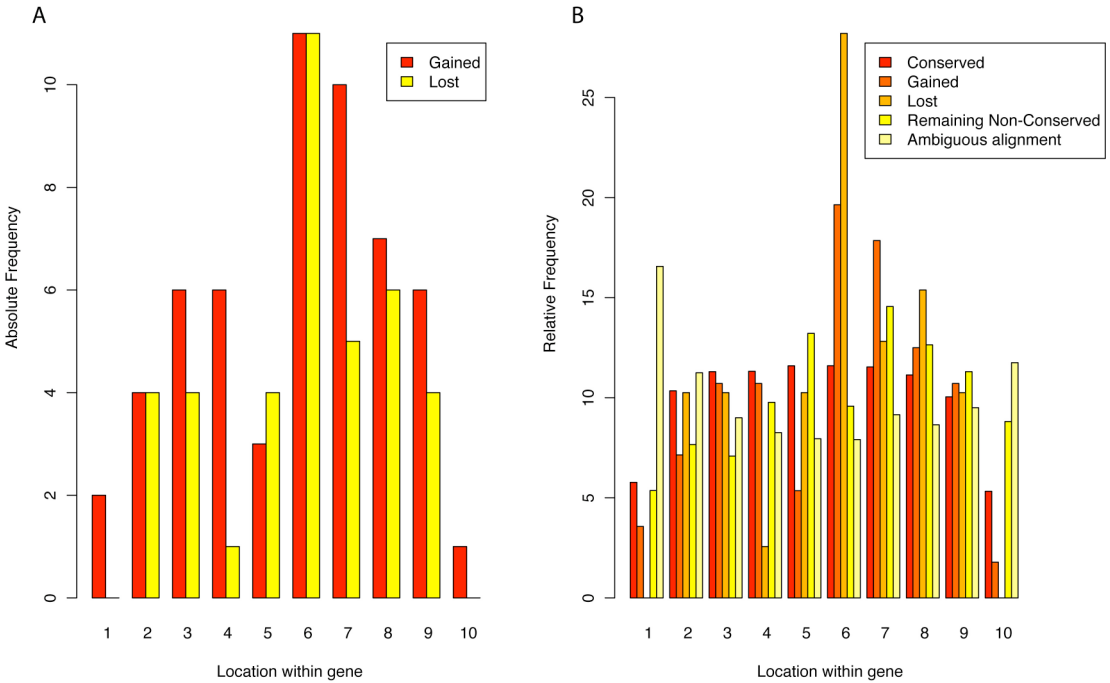

**Supplementary Figure 3:** Relationship of intron gain and loss to GC3 content of the gene. All Arabidopsis genes were binned into three equal-sized GC3 categories. The frequencies of genes with gained or lost introns are shown. Also shown is the total number of genes in our duplicated gene dataset that fell into each GC3 category.

Gonzalez Knowles and McLysaght; Supplementary Figure 3

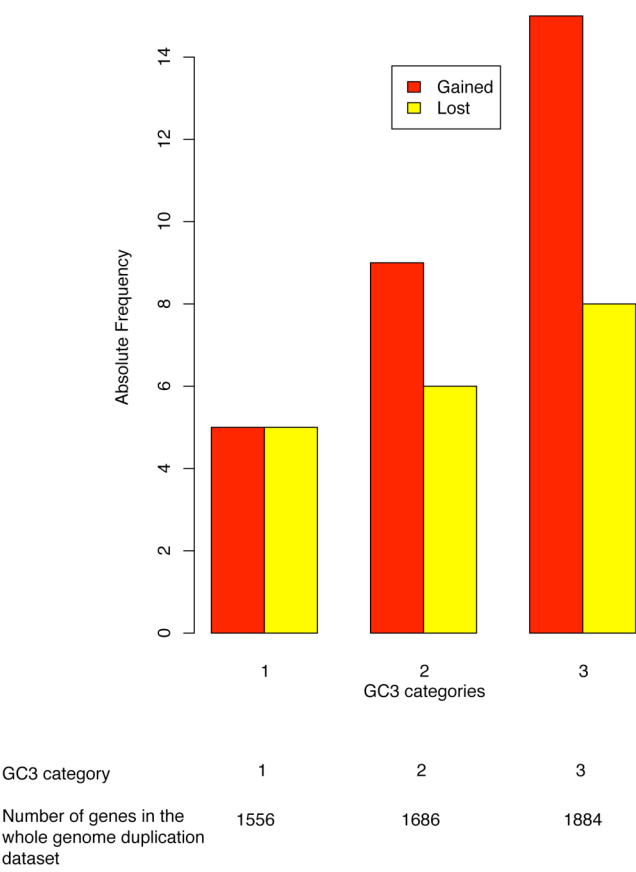

Supplement: msl017_Supplementary_Data.zip [file msl017_Supplementary_Data.zip › msl017SuppFigures.pdf]
