# Supplementary material for: High Rate of Recent Intron Gain and Loss in Simultaneously Duplicated Arabidopsis Genes
Source: Oxford University Press journal article supplement (doi:10.1093/molbev/msl017), 2006-05-23
Supplement: msl017_Supplementary_Data.zip [file msl017_Supplementary_Data.zip › msl017SuppTable1.pdf]

Supplementary Table 1: Arabidopsis gene pairs used in this study

| Gene A    | Gene B    |
|-----------|-----------|
| At3g07850 | At5g48140 |
| At3g08570 | At5g48130 |
| At1g63300 | At5g41140 |
| At1g63430 | At5g41180 |
| At1g63450 | At5g41250 |
| At1g63500 | At5g41260 |
| At1g63640 | At5g41310 |
| At1g63800 | At5g41340 |
| At1g63820 | At5g41380 |
| At1g63830 | At5g41390 |
| At4g17500 | At5g47220 |
| At4g17520 | At5g47210 |
| At4g17530 | At5g47200 |
| At4g17560 | At5g47190 |
| At4g17570 | At5g47140 |
| At4g17580 | At5g47120 |
| At4g17600 | At5g47110 |
| At4g17615 | At5g47100 |
| At4g17640 | At5g47080 |
| At4g17660 | At5g47070 |
| At1g63840 | At5g41400 |
| At1g64000 | At5g41570 |
| At1g64090 | At5g41600 |
| At1g64170 | At5g41610 |
| At1g64180 | At5g41620 |
| At1g64190 | At5g41670 |
| At1g64210 | At5g41680 |
| At1g64230 | At5g41700 |
| At1g64260 | At5g41710 |
| At1g64300 | At5g41730 |
| At3g21500 | At4g15560 |
| At3g21560 | At4g15480 |
| At3g21600 | At4g15450 |
| At3g21620 | At4g15430 |
| At3g21650 | At4g15410 |
| At1g33990 | At4g09900 |
| At3g21880 | At4g15250 |
| At1g34020 | At4g09810 |
| At3g22120 | At4g15160 |
| At1g34030 | At4g09800 |
| At3g22180 | At4g15080 |
| At1g34200 | At4g09670 |
| At4g17670 | At5g47060 |
| At3g22220 | At4g15020 |
| At1g34470 | At4g09640 |
| At4g17680 | At5g47050 |
| At1g34550 | At4g09630 |
| At4g17690 | At5g47000 |
| At1g34740 | At4g08880 |
| At4g17710 | At5g46880 |

|           |           |
|-----------|-----------|
| At1g34780 | At4g08930 |
| At4g17720 | At5g46870 |
| At1g35140 | At4g08950 |
| At4g17870 | At5g46790 |
| At1g35160 | At4g09000 |
| At4g17880 | At5g46760 |
| At4g17890 | At5g46740 |
| At4g17900 | At5g46710 |
| At4g17920 | At5g46650 |
| At1g64320 | At5g41780 |
| At1g64340 | At5g41810 |
| At1g64520 | At5g42040 |
| At1g64610 | At5g42010 |
| At1g64670 | At5g41900 |
| At5g08570 | At5g63680 |
| At5g08590 | At5g63650 |
| At5g08610 | At5g63630 |
| At5g08640 | At5g63600 |
| At5g09220 | At5g63850 |
| At1g35330 | At4g09130 |
| At1g35460 | At4g09180 |
| At1g35470 | At4g09250 |
| At1g35515 | At4g09460 |
| At4g17950 | At5g46640 |
| At1g35580 | At4g09510 |
| At4g17960 | At5g46620 |
| At1g35630 | At4g09560 |
| At4g17970 | At5g46610 |
| At1g35670 | At4g09570 |
| At4g17980 | At5g46590 |
| At1g28050 | At2g33500 |
| At4g18050 | At5g46540 |
| At1g28070 | At2g33510 |
| At4g18100 | At5g46430 |
| At1g28110 | At2g33530 |
| At4g18140 | At5g46410 |
| At4g18150 | At5g46380 |
| At4g18160 | At5g46370 |
| At4g18170 | At5g46350 |
| At1g28230 | At2g33750 |
| At1g28280 | At2g33780 |
| At1g28290 | At2g33790 |
| At1g28330 | At2g33830 |
| At4g18290 | At5g46240 |
| At1g28400 | At2g33850 |
| At4g18375 | At5g46190 |
| At1g28550 | At2g33870 |
| At4g18380 | At5g46170 |
| At1g29030 | At2g34040 |
| At4g18480 | At5g45930 |
| At1g29050 | At2g34070 |
| At4g18620 | At5g45860 |
| At1g29090 | At2g34080 |

|           |           |
|-----------|-----------|
| At4g18630 | At5g45850 |
| At1g29160 | At2g34140 |
| At4g18640 | At5g45840 |
| At4g18690 | At5g45830 |
| At4g18700 | At5g45810 |
| At4g18760 | At5g45770 |
| At1g29170 | At2g34150 |
| At1g29250 | At2g34160 |
| At1g29310 | At2g34250 |
| At1g29470 | At2g34300 |
| At1g21440 | At1g77060 |
| At4g18800 | At5g45750 |
| At1g29540 | At2g34330 |
| At1g21590 | At1g77280 |
| At4g18820 | At5g45720 |
| At1g29640 | At2g34340 |
| At1g21610 | At1g77310 |
| At4g18880 | At5g45710 |
| At1g29710 | At2g34370 |
| At1g21720 | At1g77440 |
| At4g18920 | At5g45690 |
| At1g29760 | At2g34380 |
| At1g21740 | At1g77500 |
| At4g18970 | At5g45670 |
| At1g29890 | At2g34410 |
| At1g21750 | At1g77510 |
| At4g18980 | At5g45630 |
| At1g29910 | At2g34430 |
| At1g21770 | At1g77540 |
| At4g19040 | At5g45560 |
| At4g19050 | At5g45510 |
| At1g21810 | At1g77580 |
| At4g19060 | At5g45490 |
| At1g21870 | At1g77610 |
| At4g19090 | At5g45480 |
| At1g21880 | At1g77630 |
| At1g29970 | At2g34480 |
| At1g29980 | At2g34510 |
| At1g30040 | At2g34555 |
| At1g30120 | At2g34590 |
| At1g21910 | At1g77640 |
| At1g30190 | At2g34610 |
| At1g21920 | At1g77660 |
| At1g30400 | At2g34660 |
| At1g21980 | At1g77740 |
| At1g30490 | At2g34710 |
| At1g22050 | At1g77870 |
| At1g30590 | At2g34750 |
| At1g22070 | At1g77920 |
| At1g30620 | At2g34850 |
| At1g22130 | At1g77980 |
| At1g30630 | At2g34840 |
| At1g22150 | At1g78000 |

|           |           |
|-----------|-----------|
| At1g22160 | At1g78020 |
| At1g22170 | At1g78050 |
| At1g22190 | At1g78080 |
| At1g30650 | At2g34830 |
| At1g30670 | At2g34820 |
| At1g30760 | At2g34810 |
| At1g30810 | At2g34880 |
| At1g22210 | At1g78090 |
| At1g30820 | At2g34890 |
| At1g22220 | At1g78100 |
| At1g30850 | At2g34910 |
| At1g22230 | At1g78110 |
| At1g30860 | At2g34920 |
| At1g22240 | At1g78160 |
| At1g30900 | At2g34940 |
| At1g22250 | At1g78170 |
| At1g31020 | At2g35010 |
| At1g31070 | At2g35020 |
| At1g22330 | At1g78260 |
| At1g22480 | At1g72230 |
| At1g22490 | At1g72210 |
| At1g22500 | At1g72200 |
| At1g22530 | At1g72150 |
| At1g66460 | At5g37790 |
| At1g66470 | At5g37800 |
| At1g66480 | At5g37840 |
| At1g66740 | At5g38110 |
| At1g66840 | At5g38150 |
| At1g66850 | At5g38160 |
| At1g66860 | At5g38200 |
| At1g66880 | At5g38210 |
| At1g66900 | At5g38220 |
| At1g31120 | At2g35060 |
| At1g67035 | At5g38300 |
| At1g04450 | At2g33460 |
| At1g04470 | At2g33420 |
| At1g22540 | At1g72120 |
| At1g04480 | At2g33370 |
| At1g22600 | At1g72100 |
| At1g04490 | At2g33360 |
| At1g22650 | At1g72000 |
| At1g04500 | At2g33350 |
| At1g22670 | At1g71980 |
| At1g04510 | At2g33340 |
| At1g04520 | At2g33330 |
| At1g22710 | At1g71880 |
| At1g04540 | At2g33320 |
| At1g22760 | At1g71770 |
| At1g04550 | At2g33310 |
| At1g22810 | At1g71520 |
| At1g22830 | At1g71420 |
| At1g22870 | At1g71410 |
| At1g22880 | At1g71380 |

|           |           |
|-----------|-----------|
| At1g67090 | At5g38410 |
| At1g67110 | At5g38450 |
| At1g67250 | At5g38650 |
| At1g67270 | At5g38690 |
| At3g01015 | At5g15510 |
| At3g01040 | At5g15470 |
| At3g01050 | At5g15460 |
| At3g01070 | At5g15350 |
| At3g01140 | At5g15310 |
| At1g04570 | At2g33280 |
| At3g01190 | At5g15180 |
| At1g04600 | At2g33240 |
| At1g04610 | At2g33230 |
| At1g22920 | At1g71230 |
| At1g04710 | At2g33150 |
| At1g22970 | At1g71150 |
| At1g04760 | At2g32670 |
| At1g22990 | At1g71050 |
| At1g04810 | At2g32730 |
| At1g04860 | At2g32780 |
| At1g23010 | At1g71040 |
| At1g04930 | At2g32840 |
| At1g23030 | At1g71020 |
| At1g04980 | At2g32920 |
| At1g23040 | At1g70990 |
| At1g04990 | At2g32930 |
| At1g23080 | At1g70940 |
| At1g23110 | At1g70900 |
| At1g23130 | At1g70830 |
| At1g23140 | At1g70790 |
| At3g01220 | At5g15150 |
| At3g01260 | At5g15140 |
| At3g01270 | At5g15110 |
| At3g01280 | At5g15090 |
| At3g01300 | At5g15080 |
| At3g01310 | At5g15070 |
| At3g01320 | At5g15020 |
| At3g01330 | At5g14960 |
| At3g01350 | At5g14940 |
| At1g05000 | At2g32960 |
| At3g01450 | At5g14790 |
| At1g05070 | At2g32580 |
| At1g05100 | At2g32510 |
| At1g23150 | At1g70780 |
| At1g05140 | At2g32480 |
| At1g23170 | At1g70770 |
| At1g05150 | At2g32450 |
| At1g05160 | At2g32440 |
| At1g23190 | At1g70730 |
| At1g05170 | At2g32430 |
| At1g23205 | At1g70720 |
| At1g05180 | At2g32410 |
| At1g23210 | At1g70710 |

|           |           |
|-----------|-----------|
| At1g05200 | At2g32390 |
| At1g23240 | At1g70670 |
| At1g05210 | At2g32380 |
| At1g23260 | At1g70660 |
| At1g23290 | At1g70600 |
| At1g23310 | At1g70580 |
| At1g23320 | At1g70560 |
| At3g01500 | At5g14740 |
| At3g01520 | At5g14680 |
| At3g01540 | At5g14610 |
| At3g01560 | At5g14540 |
| At3g01590 | At5g14500 |
| At3g01600 | At5g14490 |
| At3g01620 | At5g14480 |
| At3g01640 | At5g14470 |
| At3g01650 | At5g14420 |
| At1g05230 | At2g32370 |
| At3g01690 | At5g14390 |
| At1g05300 | At2g32270 |
| At1g05320 | At2g32240 |
| At1g23340 | At1g70550 |
| At1g05420 | At2g32100 |
| At1g05570 | At2g31960 |
| At1g23350 | At1g70540 |
| At1g05580 | At2g31910 |
| At1g23380 | At1g70510 |
| At1g05630 | At2g31830 |
| At1g23460 | At1g70500 |
| At1g05640 | At2g31820 |
| At1g23490 | At1g70490 |
| At1g05670 | At2g31790 |
| At1g23530 | At1g70470 |
| At1g05730 | At2g31725 |
| At1g23540 | At1g70460 |
| At1g23550 | At1g70440 |
| At1g23700 | At1g70430 |
| At1g23710 | At1g70420 |
| At3g01740 | At5g14290 |
| At3g01770 | At5g14270 |
| At3g01890 | At5g14170 |
| At3g01930 | At5g14120 |
| At3g01950 | At5g14110 |
| At3g02000 | At5g14070 |
| At3g02020 | At5g14060 |
| At3g02080 | At5g15520 |
| At3g02160 | At5g15570 |
| At3g02170 | At5g15580 |
| At1g23730 | At1g70410 |
| At1g23760 | At1g70370 |
| At1g23790 | At1g70340 |
| At1g23820 | At1g70310 |
| At1g23870 | At1g70290 |
| At1g24140 | At1g70170 |

|           |           |
|-----------|-----------|
| At1g24150 | At1g70140 |
| At1g24160 | At1g70100 |
| At1g24170 | At1g70090 |
| At1g24190 | At1g70060 |
| At3g02180 | At5g15600 |
| At3g02200 | At5g15610 |
| At3g02210 | At5g15630 |
| At3g02230 | At5g15650 |
| At3g02250 | At5g15740 |
| At3g02310 | At5g15800 |
| At3g02320 | At5g15810 |
| At3g02340 | At5g15820 |
| At3g02380 | At5g15840 |
| At3g02410 | At5g15860 |
| At2g20960 | At4g38550 |
| At2g21060 | At4g38680 |
| At2g21100 | At4g38700 |
| At2g21120 | At4g38730 |
| At2g21130 | At4g38740 |
| At2g21140 | At4g38770 |
| At2g21190 | At4g38790 |
| At2g21210 | At4g38840 |
| At2g21220 | At4g38860 |
| At2g21230 | At4g38900 |
| At2g45830 | At3g61270 |
| At2g45850 | At3g61310 |
| At2g45870 | At3g61320 |
| At2g45900 | At3g61380 |
| At3g02440 | At5g15890 |
| At2g45960 | At3g61430 |
| At3g02460 | At5g15930 |
| At2g46080 | At3g61500 |
| At3g02470 | At5g15950 |
| At2g46110 | At3g61530 |
| At3g02490 | At5g15980 |
| At2g46160 | At3g61550 |
| At3g02500 | At5g16030 |
| At2g46170 | At3g61560 |
| At3g02520 | At5g16050 |
| At2g46180 | At3g61570 |
| At3g02530 | At5g16070 |
| At3g02560 | At5g16130 |
| At3g02610 | At5g16230 |
| At3g02640 | At5g16250 |
| At2g21240 | At4g38910 |
| At2g21270 | At4g38930 |
| At2g21320 | At4g38960 |
| At2g21330 | At4g38970 |
| At2g21340 | At4g39030 |
| At2g21380 | At4g39050 |
| At2g21410 | At4g39080 |
| At2g21430 | At4g39090 |
| At2g21480 | At4g39110 |

|           |           |
|-----------|-----------|
| At2g21500 | At4g39140 |
| At2g46210 | At3g61580 |
| At2g46260 | At3g61600 |
| At2g46310 | At3g61630 |
| At2g46330 | At3g61640 |
| At3g02700 | At5g16360 |
| At2g46380 | At3g61670 |
| At3g02730 | At5g16400 |
| At2g46530 | At3g61830 |
| At3g02780 | At5g16440 |
| At2g46590 | At3g61850 |
| At2g17090 | At4g35230 |
| At3g02790 | At5g16470 |
| At2g46610 | At3g61860 |
| At2g17110 | At4g35240 |
| At3g02800 | At5g16480 |
| At2g46660 | At3g61880 |
| At2g17130 | At4g35260 |
| At3g02810 | At5g16500 |
| At2g46680 | At3g61890 |
| At2g17150 | At4g35270 |
| At3g02830 | At5g16540 |
| At2g17180 | At4g35280 |
| At3g02880 | At5g16590 |
| At2g17260 | At4g35290 |
| At3g02900 | At5g16660 |
| At2g17290 | At4g35310 |
| At3g02930 | At5g16730 |
| At2g17300 | At4g35320 |
| At2g17320 | At4g35360 |
| At2g17380 | At4g35410 |
| At2g46690 | At3g61900 |
| At2g46770 | At3g61910 |
| At2g46800 | At3g61940 |
| At2g46810 | At3g61950 |
| At3g02940 | At5g16770 |
| At2g46870 | At3g61970 |
| At3g02950 | At5g16790 |
| At2g46930 | At3g62060 |
| At3g02980 | At5g16800 |
| At2g46940 | At3g62070 |
| At2g17390 | At4g35450 |
| At3g02990 | At5g16820 |
| At2g46970 | At3g62090 |
| At2g17420 | At4g35460 |
| At3g03010 | At5g16870 |
| At2g46990 | At3g62100 |
| At2g17440 | At4g35470 |
| At3g03050 | At5g16910 |
| At2g47000 | At3g62150 |
| At2g17450 | At4g35480 |
| At3g03060 | At5g16930 |
| At2g17530 | At4g35500 |

|           |           |
|-----------|-----------|
| At3g03080 | At5g17000 |
| At2g17560 | At4g35570 |
| At3g03090 | At5g17010 |
| At2g17620 | At4g35620 |
| At3g03110 | At5g17020 |
| At2g17630 | At4g35630 |
| At2g17640 | At4g35640 |
| At2g17680 | At4g35690 |
| At2g47040 | At3g62170 |
| At2g47050 | At3g62180 |
| At2g47060 | At3g62220 |
| At2g47090 | At3g62240 |
| At3g03120 | At5g17060 |
| At2g47110 | At3g62250 |
| At3g03160 | At5g17190 |
| At2g47160 | At3g62270 |
| At3g03190 | At5g17220 |
| At2g47170 | At3g62290 |
| At2g17700 | At4g35780 |
| At3g03200 | At5g17260 |
| At2g47230 | At3g62300 |
| At2g17720 | At4g35810 |
| At3g03250 | At5g17310 |
| At2g47250 | At3g62310 |
| At2g17730 | At4g35840 |
| At3g03260 | At5g17320 |
| At2g47260 | At3g62340 |
| At2g17760 | At4g35880 |
| At3g03280 | At5g17350 |
| At2g17770 | At4g35900 |
| At3g03290 | At5g17390 |
| At2g17780 | At4g35920 |
| At3g03340 | At5g17440 |
| At2g17840 | At4g35980 |
| At3g03400 | At5g17470 |
| At2g17860 | At4g36010 |
| At2g17870 | At4g36020 |
| At2g17880 | At4g36040 |
| At2g47380 | At3g62400 |
| At2g47400 | At3g62410 |
| At2g47440 | At3g62570 |
| At2g47460 | At3g62610 |
| At2g47530 | At3g62680 |
| At2g47560 | At3g62690 |
| At2g47610 | At3g62870 |
| At2g17890 | At4g36070 |
| At2g47630 | At3g62860 |
| At2g17970 | At4g36090 |
| At2g47640 | At3g62840 |
| At2g17990 | At4g36100 |
| At2g47650 | At3g62830 |
| At2g18020 | At4g36130 |
| At2g18060 | At4g36160 |

|           |           |
|-----------|-----------|
| At2g18080 | At4g36190 |
| At2g18100 | At4g36210 |
| At2g18120 | At4g36260 |
| At2g18150 | At4g36430 |
| At2g18170 | At4g36450 |
| At2g47670 | At3g62820 |
| At2g47690 | At3g62790 |
| At2g47730 | At3g62760 |
| At2g47800 | At3g62700 |
| At2g47870 | At3g62950 |
| At2g47970 | At3g63000 |
| At2g48150 | At3g63080 |
| At2g18180 | At4g36490 |
| At2g18210 | At4g36500 |
| At1g51950 | At3g16500 |
| At2g18300 | At4g36540 |
| At1g51960 | At3g16490 |
| At2g18330 | At4g36580 |
| At1g51980 | At3g16480 |
| At2g18340 | At4g36600 |
| At2g18360 | At4g36610 |
| At2g18380 | At4g36620 |
| At2g18480 | At4g36670 |
| At2g18520 | At4g36680 |
| At2g18540 | At4g36700 |
| At1g52140 | At3g16330 |
| At1g52160 | At3g16260 |
| At1g52190 | At3g16180 |
| At1g52230 | At3g16140 |
| At1g52240 | At3g16130 |
| At2g18550 | At4g36740 |
| At1g52250 | At3g16120 |
| At2g18590 | At4g36790 |
| At1g52260 | At3g16110 |
| At2g18600 | At4g36800 |
| At1g52280 | At3g16100 |
| At5g07170 | At5g62240 |
| At1g52300 | At3g16080 |
| At5g07190 | At5g62210 |
| At5g07230 | At5g62080 |
| At5g07240 | At5g62070 |
| At5g07290 | At5g61960 |
| At5g07300 | At5g61900 |
| At5g07310 | At5g61890 |
| At1g52360 | At3g15980 |
| At1g52380 | At3g15970 |
| At1g52410 | At3g15950 |
| At1g52420 | At3g15940 |
| At1g52570 | At3g15730 |
| At1g52600 | At3g15710 |
| At5g07320 | At5g61810 |
| At1g52660 | At3g15700 |
| At5g07340 | At5g61790 |

|           |           |
|-----------|-----------|
| At1g52670 | At3g15690 |
| At5g07350 | At5g61780 |
| At1g52690 | At3g15670 |
| At5g07370 | At5g61760 |
| At1g52700 | At3g15650 |
| At5g07450 | At5g61650 |
| At5g07460 | At5g61640 |
| At5g07490 | At5g61630 |
| At5g07580 | At5g61590 |
| At5g07620 | At5g61570 |
| At5g07660 | At5g61460 |
| At1g52720 | At3g15630 |
| At1g52730 | At3g15610 |
| At1g52770 | At3g15570 |
| At1g52830 | At3g15540 |
| At1g52880 | At3g15510 |
| At1g52910 | At3g15480 |
| At5g07680 | At5g61430 |
| At1g52930 | At3g15460 |
| At5g07700 | At5g61420 |
| At1g53100 | At3g15350 |
| At5g07710 | At5g61390 |
| At1g53110 | At3g15340 |
| At5g07790 | At5g61300 |
| At1g53160 | At3g15270 |
| At5g07800 | At5g61290 |
| At5g07820 | At5g61260 |
| At5g07830 | At5g61250 |
| At5g07840 | At5g61230 |
| At5g07880 | At5g61210 |
| At5g07890 | At5g61200 |
| At1g53165 | At3g15220 |
| At1g53170 | At3g15210 |
| At1g53180 | At3g15110 |
| At1g53190 | At3g15070 |
| At1g53230 | At3g15030 |
| At1g53240 | At3g15020 |
| At5g08000 | At5g61130 |
| At1g53260 | At3g15000 |
| At5g08010 | At5g61040 |
| At1g53280 | At3g14990 |
| At5g08020 | At5g61000 |
| At1g53290 | At3g14960 |
| At5g08070 | At5g60970 |
| At1g53300 | At3g14950 |
| At3g49290 | At5g24310 |
| At3g49330 | At5g24370 |
| At3g49350 | At5g24390 |
| At3g49360 | At5g24410 |
| At3g49370 | At5g24430 |
| At3g47380 | At5g62350 |
| At3g47460 | At5g62410 |
| At3g47500 | At5g62430 |

|           |           |
|-----------|-----------|
| At3g47550 | At5g62460 |
| At3g47600 | At5g62470 |
| At3g47690 | At5g62500 |
| At3g47720 | At5g62520 |
| At3g47820 | At5g62560 |
| At3g47950 | At5g62670 |
| At3g47960 | At5g62680 |
| At3g49390 | At5g24440 |
| At3g49410 | At5g24450 |
| At3g49530 | At5g24590 |
| At3g49550 | At5g24610 |
| At3g49560 | At5g24650 |
| At3g49570 | At5g24660 |
| At2g22410 | At4g38010 |
| At2g22630 | At4g37940 |
| At2g22660 | At4g37900 |
| At2g22680 | At4g37890 |
| At3g48040 | At5g62880 |
| At3g48070 | At5g62910 |
| At3g48100 | At5g62920 |
| At3g48240 | At5g63130 |
| At3g48360 | At5g63160 |
| At3g48390 | At5g63190 |
| At3g48440 | At5g63260 |
| At3g48510 | At5g63350 |
| At3g48520 | At5g63450 |
| At3g48590 | At5g63470 |
| At3g48660 | At5g63500 |
| At3g48680 | At5g63510 |
| At3g48710 | At5g63550 |
| At3g48720 | At5g63560 |
| At3g48730 | At5g63570 |
| At3g48750 | At5g63610 |
| At4g24260 | At5g49720 |
| At4g24280 | At5g49910 |
| At4g24330 | At5g49940 |
| At4g24390 | At5g49980 |
| At4g24630 | At5g50020 |
| At4g24640 | At5g50030 |
| At4g24720 | At5g50200 |
| At5g09260 | At5g63880 |
| At4g24770 | At5g50250 |
| At5g09290 | At5g63980 |
| At4g24810 | At5g50330 |
| At5g09330 | At5g64060 |
| At4g24890 | At5g50400 |
| At5g09350 | At5g64070 |
| At4g24920 | At5g50460 |
| At5g09410 | At5g64220 |
| At4g24940 | At5g50580 |
| At5g09440 | At5g64260 |
| At4g24960 | At5g50720 |
| At5g09460 | At5g64340 |

|           |           |
|-----------|-----------|
| At4g24970 | At5g50780 |
| At5g09540 | At5g64360 |
| At5g09560 | At5g64390 |
| At5g09570 | At5g64400 |
| At4g25010 | At5g50800 |
| At4g25090 | At5g51060 |
| At4g25100 | At5g51100 |
| At5g09620 | At5g64430 |
| At4g25140 | At5g51210 |
| At5g09670 | At5g64550 |
| At4g25150 | At5g51260 |
| At5g09690 | At5g64560 |
| At4g25160 | At5g51270 |
| At5g09730 | At5g64570 |
| At4g25200 | At5g51440 |
| At5g09740 | At5g64610 |
| At4g25230 | At5g51450 |
| At5g09760 | At5g64640 |
| At4g25240 | At5g51480 |
| At5g09770 | At5g64650 |
| At4g25260 | At5g51520 |
| At5g09800 | At5g64660 |
| At5g09840 | At5g64710 |
| At5g09870 | At5g64740 |
| At4g25320 | At5g51590 |
| At4g25360 | At5g51640 |
| At4g25390 | At5g51770 |
| At5g09900 | At5g64760 |
| At4g25410 | At5g51790 |
| At5g09910 | At5g64810 |
| At4g25420 | At5g51810 |
| At5g09930 | At5g64840 |
| At4g25430 | At5g51850 |
| At5g10010 | At5g64910 |
| At4g25440 | At5g51980 |
| At5g10030 | At5g65210 |
| At4g25480 | At5g51990 |
| At5g10060 | At5g65180 |
| At4g25500 | At5g52040 |
| At5g10090 | At5g65160 |
| At4g25530 | At5g52170 |
| At5g10100 | At5g65140 |
| At5g10110 | At5g65120 |
| At5g10120 | At5g65100 |
| At4g19130 | At5g45400 |
| At4g19230 | At5g45340 |
| At4g19410 | At5g45280 |
| At4g19600 | At5g45190 |
| At4g19640 | At5g45130 |
| At4g19660 | At5g45110 |
| At4g19700 | At5g45100 |
| At4g19880 | At5g44990 |
| At4g25560 | At5g52260 |

|           |           |
|-----------|-----------|
| At4g19950 | At5g44860 |
| At4g25580 | At5g52310 |
| At4g20020 | At5g44780 |
| At4g25590 | At5g52360 |
| At5g10140 | At5g65070 |
| At4g25620 | At5g52430 |
| At5g10210 | At5g65030 |
| At4g25630 | At5g52470 |
| At5g10220 | At5g65020 |
| At4g25670 | At5g52550 |
| At5g10240 | At5g65010 |
| At4g25700 | At5g52570 |
| At5g10270 | At5g64960 |
| At4g25740 | At5g52650 |
| At5g10280 | At5g65230 |
| At4g25750 | At5g52860 |
| At5g10290 | At5g65240 |
| At4g25800 | At5g57580 |
| At5g10350 | At5g65260 |
| At5g10390 | At5g65350 |
| At5g10410 | At5g65370 |
| At4g20080 | At5g44760 |
| At4g20140 | At5g44700 |
| At4g20170 | At5g44670 |
| At4g20190 | At5g44660 |
| At4g20230 | At5g44630 |
| At4g20390 | At5g44550 |
| At4g20430 | At5g44530 |
| At4g20440 | At5g44500 |
| At4g25820 | At5g57530 |
| At4g20460 | At5g44480 |
| At4g25830 | At5g57480 |
| At4g20780 | At5g44460 |
| At4g25840 | At5g57440 |
| At5g10420 | At5g65380 |
| At4g25860 | At5g57240 |
| At5g10440 | At5g65420 |
| At4g25870 | At5g57270 |
| At5g10450 | At5g65430 |
| At4g25890 | At5g57290 |
| At5g10470 | At5g65460 |
| At4g25900 | At5g57330 |
| At5g10510 | At5g65510 |
| At4g25940 | At5g57200 |
| At5g10530 | At5g65600 |
| At4g25970 | At5g57190 |
| At4g25990 | At5g57180 |
| At5g10540 | At5g65620 |
| At5g10550 | At5g65630 |
| At5g10570 | At5g65640 |
| At1g13600 | At2g04038 |
| At4g20890 | At5g44340 |
| At4g20900 | At5g44330 |

|           |           |
|-----------|-----------|
| At4g20980 | At5g44320 |
| At4g21020 | At5g44310 |
| At1g55110 | At3g13810 |
| At1g55120 | At3g13790 |
| At1g55130 | At3g13772 |
| At1g55140 | At3g13740 |
| At4g26060 | At5g57060 |
| At4g26080 | At5g57050 |
| At1g55200 | At3g13690 |
| At4g26130 | At5g56980 |
| At4g26140 | At5g56870 |
| At1g13640 | At2g03890 |
| At4g26150 | At5g56860 |
| At1g13730 | At2g03640 |
| At4g26230 | At5g56710 |
| At1g13860 | At2g03480 |
| At4g26260 | At5g56640 |
| At1g13880 | At2g03470 |
| At4g26270 | At5g56630 |
| At1g13900 | At2g03450 |
| At4g26350 | At5g56410 |
| At4g26390 | At5g56350 |
| At1g13930 | At2g03440 |
| At1g13960 | At2g03340 |
| At1g14010 | At2g03290 |
| At1g14020 | At2g03280 |
| At1g14040 | At2g03260 |
| At1g55210 | At3g13650 |
| At1g55310 | At3g13570 |
| At1g55360 | At3g13510 |
| At1g55490 | At3g13470 |
| At1g55510 | At3g13450 |
| At1g55520 | At3g13445 |
| At1g55530 | At3g13430 |
| At1g55570 | At3g13390 |
| At4g26400 | At5g56340 |
| At1g55610 | At3g13380 |
| At4g26430 | At5g56280 |
| At1g55650 | At3g13350 |
| At4g26440 | At5g56270 |
| At4g26480 | At5g56140 |
| At1g14080 | At2g03220 |
| At4g26490 | At5g56050 |
| At1g14210 | At2g02990 |
| At4g26540 | At5g56040 |
| At1g14230 | At2g02970 |
| At4g26550 | At5g56020 |
| At1g14260 | At2g02960 |
| At4g26570 | At5g55990 |
| At4g26580 | At5g55970 |
| At1g14280 | At2g02950 |
| At4g26590 | At5g55930 |
| At1g14330 | At2g02870 |

|           |           |
|-----------|-----------|
| At1g14350 | At2g02820 |
| At1g14360 | At2g02810 |
| At1g14370 | At2g02800 |
| At1g14380 | At2g02790 |
| At1g55680 | At3g13340 |
| At1g55730 | At3g13320 |
| At1g55820 | At3g13222 |
| At1g55890 | At3g13150 |
| At1g55920 | At3g13110 |
| At1g55930 | At3g13070 |
| At1g55970 | At3g12980 |
| At1g56020 | At3g12970 |
| At1g56110 | At3g12860 |
| At1g56150 | At3g12830 |
| At1g14390 | At2g02780 |
| At1g14400 | At2g02760 |
| At1g14410 | At2g02740 |
| At1g14420 | At2g02720 |
| At1g14440 | At2g02540 |
| At1g14450 | At2g02510 |
| At1g14460 | At2g02480 |
| At1g14510 | At2g02470 |
| At1g14580 | At2g02070 |
| At1g14590 | At2g02060 |
| At1g56190 | At3g12780 |
| At1g56410 | At3g12580 |
| At4g10730 | At4g24100 |
| At4g10750 | At4g24080 |
| At4g10960 | At4g23920 |
| At4g10970 | At4g23910 |
| At4g11010 | At4g23900 |
| At4g11030 | At4g23850 |
| At4g11070 | At4g23810 |
| At4g11080 | At4g23800 |
| At1g14630 | At2g01990 |
| At1g14660 | At2g01980 |
| At1g14670 | At2g01970 |
| At1g14685 | At2g01930 |
| At1g14690 | At2g01910 |
| At1g14700 | At2g01890 |
| At1g14720 | At2g01850 |
| At1g14840 | At2g01750 |
| At1g14860 | At2g01670 |
| At1g14890 | At2g01610 |
| At1g05800 | At2g31690 |
| At1g05810 | At2g31680 |
| At1g05870 | At2g31560 |
| At1g05890 | At2g31510 |
| At4g11090 | At4g23790 |
| At1g05900 | At2g31480 |
| At4g11140 | At4g23750 |
| At1g06020 | At2g31390 |
| At4g11180 | At4g23690 |

|           |           |
|-----------|-----------|
| At1g06040 | At2g31380 |
| At4g11220 | At4g23630 |
| At1g06070 | At2g31370 |
| At4g11260 | At4g23570 |
| At1g06080 | At2g31360 |
| At4g11300 | At4g23530 |
| At1g06130 | At2g31350 |
| At4g11350 | At4g23490 |
| At4g11380 | At4g23460 |
| At4g11410 | At4g23430 |
| At4g11530 | At4g23160 |
| At1g14910 | At2g01600 |
| At1g14920 | At2g01570 |
| At1g14930 | At2g01520 |
| At1g14970 | At2g01480 |
| At1g15010 | At2g01300 |
| At1g15020 | At2g01270 |
| At1g15030 | At2g01260 |
| At1g15050 | At2g01200 |
| At1g15080 | At2g01180 |
| At1g15100 | At2g01150 |
| At1g06150 | At2g31280 |
| At1g06160 | At2g31230 |
| At1g06170 | At2g31220 |
| At1g06180 | At2g31180 |
| At4g11740 | At4g23040 |
| At1g06200 | At2g31140 |
| At4g11780 | At4g23020 |
| At1g06250 | At2g31100 |
| At4g11800 | At4g23000 |
| At1g06390 | At2g30980 |
| At4g11810 | At4g22990 |
| At1g06430 | At2g30950 |
| At4g11860 | At4g22960 |
| At1g06540 | At2g30930 |
| At4g11880 | At4g22950 |
| At1g06660 | At2g30820 |
| At4g11910 | At4g22920 |
| At4g11920 | At4g22910 |
| At4g11950 | At4g22900 |
| At4g11960 | At4g22890 |
| At1g06670 | At2g30800 |
| At1g06680 | At2g30790 |
| At1g06750 | At2g30630 |
| At4g11990 | At4g22860 |
| At1g06760 | At2g30620 |
| At4g12030 | At4g22840 |
| At1g06770 | At2g30580 |
| At4g12040 | At4g22820 |
| At1g06800 | At2g30550 |
| At4g12050 | At4g22810 |
| At1g06830 | At2g30540 |
| At4g12080 | At4g22770 |

|           |           |
|-----------|-----------|
| At1g06870 | At2g30440 |
| At4g12410 | At4g22620 |
| At1g06890 | At2g30460 |
| At4g12430 | At4g22590 |
| At4g12440 | At4g22570 |
| At4g12450 | At4g22560 |
| At4g12460 | At4g22540 |
| At1g06920 | At2g30400 |
| At1g06960 | At2g30260 |
| At1g06970 | At2g30240 |
| At1g06980 | At2g30230 |
| At4g12560 | At4g22390 |
| At1g07020 | At2g30160 |
| At4g12600 | At4g22380 |
| At1g07140 | At2g30060 |
| At3g08770 | At5g01870 |
| At1g07150 | At2g30040 |
| At3g08850 | At5g01770 |
| At1g07160 | At2g30020 |
| At3g08890 | At5g01610 |
| At1g07170 | At2g30000 |
| At3g08910 | At5g01390 |
| At1g07180 | At2g29990 |
| At3g09000 | At5g01280 |
| At3g09020 | At5g01250 |
| At3g09070 | At5g01170 |
| At3g09140 | At5g01120 |
| At1g07200 | At2g29970 |
| At1g07240 | At2g29750 |
| At1g07270 | At2g29680 |
| At1g07330 | At2g29620 |
| At1g07360 | At2g29580 |
| At1g07370 | At2g29570 |
| At1g07400 | At2g29500 |
| At1g07420 | At2g29390 |
| At1g07430 | At2g29380 |
| At1g07440 | At2g29260 |
| At1g07510 | At2g29080 |
| At1g07530 | At2g29060 |
| At1g07630 | At2g28890 |
| At1g07640 | At2g28810 |
| At1g07660 | At2g28740 |
| At1g07720 | At2g28630 |
| At1g07730 | At2g28670 |
| At1g07750 | At2g28680 |
| At1g07790 | At2g28720 |
| At1g07870 | At2g28590 |
| At3g03430 | At5g17480 |
| At3g03450 | At5g17490 |
| At3g03460 | At5g17510 |
| At3g03480 | At5g17540 |
| At3g03490 | At5g17550 |
| At3g03500 | At5g17570 |

|           |           |
|-----------|-----------|
| At3g03510 | At5g17580 |
| At3g03550 | At5g17600 |
| At3g03620 | At5g17700 |
| At1g07900 | At2g28500 |
| At3g03660 | At5g17810 |
| At1g07990 | At2g28360 |
| At1g08000 | At2g28340 |
| At1g08040 | At2g28310 |
| At1g08080 | At2g28210 |
| At1g08200 | At2g27860 |
| At1g08250 | At2g27820 |
| At1g08360 | At2g27530 |
| At1g08410 | At2g27200 |
| At1g08420 | At2g27210 |
| At3g03670 | At5g17820 |
| At3g03700 | At5g17830 |
| At3g03780 | At5g17920 |
| At3g03850 | At5g18020 |
| At3g03860 | At5g18120 |
| At3g03870 | At5g18130 |
| At3g03910 | At5g18170 |
| At3g03920 | At5g18180 |
| At3g03940 | At5g18190 |
| At1g08440 | At2g27240 |
| At3g04000 | At5g18210 |
| At1g08730 | At2g31900 |
| At1g08760 | At2g31920 |
| At1g09080 | At2g32120 |
| At2g35850 | At3g52360 |
| At2g35860 | At3g52370 |
| At2g35930 | At3g52450 |
| At2g35970 | At3g52470 |
| At2g36050 | At3g52540 |
| At2g36060 | At3g52560 |
| At3g04010 | At5g18220 |
| At3g04030 | At5g18240 |
| At3g04040 | At5g18250 |
| At3g04070 | At5g18270 |
| At3g04080 | At5g18280 |
| At3g04090 | At5g18290 |
| At3g04230 | At5g18380 |
| At3g04290 | At5g18430 |
| At3g04350 | At5g18490 |
| At2g36160 | At3g52580 |
| At2g36170 | At3g52590 |
| At1g12820 | At3g26810 |
| At2g36190 | At3g52600 |
| At2g36220 | At3g52710 |
| At2g36250 | At3g52750 |
| At2g36300 | At3g52760 |
| At2g36320 | At3g52800 |
| At2g36350 | At3g52890 |
| At2g36400 | At3g52910 |

|           |           |
|-----------|-----------|
| At2g36410 | At3g52920 |
| At1g12880 | At3g26690 |
| At1g12900 | At3g26650 |
| At1g12910 | At3g26640 |
| At1g12920 | At3g26618 |
| At1g12950 | At3g26590 |
| At1g12970 | At3g26500 |
| At1g13000 | At3g26440 |
| At1g13020 | At3g26400 |
| At2g36460 | At3g52930 |
| At1g13050 | At3g26350 |
| At2g36500 | At3g52950 |
| At1g13060 | At3g26340 |
| At2g36580 | At3g52990 |
| At2g36620 | At3g53020 |
| At2g36640 | At3g53040 |
| At2g36680 | At3g53120 |
| At2g36760 | At3g53150 |
| At2g37030 | At3g53250 |
| At2g37040 | At3g53260 |
| At2g37070 | At3g53320 |
| At1g13110 | At3g26280 |
| At1g13130 | At3g26130 |
| At1g13150 | At3g26125 |
| At1g13210 | At3g25610 |
| At1g13230 | At3g25670 |
| At1g13260 | At3g25730 |
| At1g13270 | At3g25740 |
| At1g13280 | At3g25780 |
| At1g13300 | At3g25790 |
| At1g13320 | At3g25800 |
| At1g13350 | At3g25840 |
| At1g13450 | At3g25990 |
| At1g13460 | At3g26020 |
| At3g05980 | At5g19340 |
| At3g06010 | At5g19310 |
| At3g06020 | At5g19260 |
| At3g06060 | At5g19200 |
| At3g06070 | At5g19190 |
| At3g06080 | At5g19160 |
| At3g06130 | At5g19090 |
| At1g53310 | At3g14940 |
| At1g53380 | At3g14870 |
| At1g53440 | At3g14840 |
| At1g53450 | At3g14830 |
| At3g06140 | At5g19080 |
| At1g53470 | At3g14810 |
| At3g06150 | At5g19060 |
| At1g53500 | At3g14790 |
| At3g06190 | At5g19000 |
| At1g53510 | At3g14720 |
| At3g06210 | At5g18980 |
| At1g53590 | At3g14590 |

|           |           |
|-----------|-----------|
| At3g06250 | At5g18960 |
| At1g53650 | At3g14450 |
| At3g06300 | At5g18900 |
| At1g53660 | At3g14410 |
| At3g06310 | At5g18800 |
| At3g06320 | At5g18790 |
| At3g06330 | At5g18760 |
| At3g06340 | At5g18750 |
| At1g53700 | At3g14370 |
| At1g53730 | At3g14350 |
| At1g53830 | At3g14300 |
| At1g53850 | At3g14290 |
| At3g06380 | At5g18680 |
| At1g53880 | At3g14260 |
| At3g06400 | At5g18620 |
| At1g53910 | At3g14230 |
| At3g06410 | At5g18550 |
| At2g22690 | At4g37880 |
| At1g53940 | At3g14210 |
| At2g22770 | At4g37850 |
| At1g31880 | At2g35600 |
| At1g54060 | At3g14180 |
| At2g22800 | At4g37790 |
| At1g32150 | At2g35530 |
| At1g54080 | At3g14100 |
| At2g22810 | At4g37770 |
| At1g32210 | At2g35520 |
| At1g54120 | At3g14060 |
| At2g22830 | At4g37760 |
| At1g32230 | At2g35510 |
| At2g22840 | At4g37740 |
| At1g32260 | At2g35480 |
| At2g22850 | At4g37730 |
| At1g32380 | At2g35390 |
| At2g22910 | At4g37670 |
| At1g32470 | At2g35370 |
| At2g22950 | At4g37640 |
| At2g23050 | At4g37590 |
| At1g54130 | At3g14050 |
| At1g54160 | At3g14020 |
| At1g54170 | At3g14010 |
| At1g54200 | At3g13980 |
| At1g32490 | At2g35340 |
| At1g54220 | At3g13930 |
| At1g32530 | At2g35330 |
| At1g54270 | At3g13920 |
| At2g23060 | At4g37580 |
| At1g32580 | At2g35240 |
| At1g54280 | At3g13900 |
| At5g08190 | At5g23090 |
| At2g23170 | At4g37390 |
| At1g32610 | At2g35230 |
| At5g08200 | At5g23130 |

|           |           |
|-----------|-----------|
| At2g23190 | At4g37310 |
| At1g32690 | At2g35200 |
| At5g08230 | At5g23150 |
| At2g23270 | At4g37290 |
| At2g23290 | At4g37260 |
| At2g23300 | At4g37250 |
| At2g23340 | At4g36900 |
| At2g23420 | At4g36940 |
| At2g23520 | At4g37100 |
| At2g23530 | At4g37110 |
| At5g08240 | At5g23160 |
| At5g08250 | At5g23190 |
| At5g08270 | At5g23200 |
| At5g08300 | At5g23250 |
| At5g08330 | At5g23280 |
| At5g08340 | At5g23330 |
| At5g08350 | At5g23350 |
| At2g23550 | At4g37150 |
| At5g08390 | At5g23430 |
| At2g23630 | At4g37160 |
| At5g08430 | At5g23480 |
| At2g23680 | At4g37220 |
| At5g08440 | At5g23490 |
| At2g23690 | At4g37240 |
| At2g23760 | At4g36870 |
| At2g23790 | At4g36820 |
| At2g23800 | At4g36810 |
| At2g18650 | At4g30400 |
| At2g18670 | At4g30370 |
| At2g18730 | At4g30340 |
| At5g08520 | At5g23650 |
| At1g03740 | At5g44290 |
| At1g03770 | At5g44280 |
| At1g03790 | At5g44260 |
| At1g03840 | At5g44160 |
| At1g03860 | At5g44140 |
| At2g18740 | At4g30330 |
| At1g03870 | At5g44130 |
| At2g18800 | At4g30280 |
| At1g03880 | At5g44120 |
| At3g22230 | At4g15000 |
| At2g18840 | At4g30260 |
| At1g03900 | At5g44110 |
| At3g22270 | At4g14990 |
| At2g18860 | At4g30240 |
| At1g03930 | At5g44100 |
| At3g22440 | At4g14900 |
| At2g18880 | At4g30200 |
| At3g22460 | At4g14880 |
| At2g18960 | At4g30190 |
| At3g22520 | At4g14840 |
| At2g18980 | At4g30170 |
| At3g22530 | At4g14830 |

|           |           |
|-----------|-----------|
| At2g19050 | At4g30140 |
| At3g22630 | At4g14800 |
| At2g19090 | At4g30130 |
| At3g22750 | At4g14780 |
| At2g19110 | At4g30110 |
| At3g22780 | At4g14770 |
| At3g22790 | At4g14760 |
| At1g03960 | At5g44090 |
| At1g03970 | At5g44080 |
| At1g03980 | At5g44070 |
| At1g04000 | At5g44060 |
| At1g04030 | At5g44040 |
| At1g04040 | At5g44020 |
| At2g19120 | At4g30100 |
| At1g04050 | At5g43990 |
| At2g19160 | At4g30060 |
| At1g04070 | At5g43970 |
| At3g22810 | At4g14740 |
| At2g19170 | At4g30020 |
| At1g04090 | At5g43950 |
| At3g22840 | At4g14690 |
| At2g19210 | At4g29990 |
| At1g04160 | At5g43900 |
| At3g22890 | At4g14680 |
| At2g19240 | At4g29950 |
| At3g22900 | At4g14660 |
| At2g19330 | At4g29880 |
| At3g22930 | At4g14640 |
| At2g19340 | At4g29870 |
| At3g22970 | At4g14620 |
| At2g19350 | At4g29850 |
| At3g23000 | At4g14580 |
| At2g19390 | At4g29790 |
| At3g23050 | At4g14550 |
| At3g23070 | At4g14510 |
| At2g19500 | At4g29740 |
| At3g23080 | At4g14500 |
| At1g04180 | At5g43890 |
| At1g04220 | At5g43760 |
| At1g04230 | At5g43720 |
| At1g04250 | At5g43700 |
| At1g04270 | At5g43640 |
| At1g04300 | At5g43560 |
| At2g19520 | At4g29730 |
| At1g04340 | At5g43460 |
| At2g19570 | At4g29640 |
| At1g04360 | At5g43420 |
| At3g23210 | At4g14410 |
| At2g19670 | At4g29510 |
| At1g04370 | At5g43410 |
| At3g23270 | At4g14370 |
| At2g19680 | At4g29480 |
| At1g04410 | At5g43330 |

|           |           |
|-----------|-----------|
| At3g23300 | At4g14360 |
| At2g19690 | At4g29460 |
| At3g23310 | At4g14350 |
| At2g19710 | At4g29440 |
| At3g23340 | At4g14340 |
| At2g19720 | At4g29430 |
| At3g23390 | At4g14320 |
| At2g19730 | At4g29410 |
| At3g23540 | At4g14290 |
| At3g23660 | At4g14160 |
| At2g19750 | At4g29390 |
| At3g23670 | At4g14150 |
| At2g19770 | At4g29340 |
| At3g23730 | At4g14130 |
| At1g04440 | At5g43320 |
| At3g48740 | At5g23660 |
| At3g48780 | At5g23670 |
| At3g48800 | At5g23680 |
| At3g48830 | At5g23690 |
| At3g48860 | At5g23700 |
| At3g48930 | At5g23740 |
| At2g19780 | At4g29240 |
| At3g48940 | At5g23750 |
| At2g19810 | At4g29190 |
| At3g48980 | At5g23850 |
| At3g23770 | At4g14080 |
| At2g19830 | At4g29160 |
| At3g23790 | At4g14070 |
| At3g04510 | At5g28490 |
| At2g19860 | At4g29130 |
| At3g23800 | At4g14030 |
| At3g23810 | At4g13940 |
| At2g20110 | At4g29000 |
| At3g23830 | At4g13850 |
| At2g20140 | At4g29040 |
| At3g23840 | At4g13840 |
| At3g24000 | At4g13650 |
| At2g20180 | At4g28810 |
| At3g24020 | At4g13580 |
| At2g20230 | At4g28770 |
| At3g24120 | At4g13640 |
| At2g20240 | At4g28760 |
| At3g24300 | At4g13510 |
| At3g04550 | At5g28500 |
| At3g04590 | At5g28590 |
| At3g04670 | At5g28650 |
| At3g04690 | At5g28680 |
| At3g04700 | At5g28690 |
| At3g04810 | At5g28290 |
| At3g04830 | At5g28220 |
| At2g20260 | At4g28750 |
| At3g04860 | At5g28150 |
| At2g20270 | At4g28730 |

|           |           |
|-----------|-----------|
| At3g24310 | At4g13480 |
| At3g04910 | At5g28080 |
| At2g20290 | At4g28710 |
| At3g24360 | At4g13360 |
| At3g04920 | At5g28060 |
| At2g20310 | At4g28690 |
| At3g24480 | At4g13340 |
| At2g20340 | At4g28680 |
| At3g24620 | At4g13240 |
| At2g20400 | At4g28610 |
| At3g24670 | At4g13210 |
| At3g24790 | At4g13190 |
| At2g20440 | At4g28550 |
| At3g24830 | At4g13170 |
| At2g20530 | At4g28510 |
| At3g25030 | At4g13100 |
| At2g20560 | At4g28480 |
| At3g25050 | At4g13080 |
| At2g20580 | At4g28470 |
| At3g25110 | At4g13050 |
| At3g04930 | At5g28040 |
| At3g04940 | At5g28020 |
| At3g04980 | At5g27240 |
| At3g05010 | At5g27210 |
| At3g05020 | At5g27200 |
| At3g05030 | At5g27150 |
| At3g05060 | At5g27120 |
| At2g20590 | At4g28430 |
| At3g05120 | At5g27320 |
| At2g20610 | At4g28420 |
| At3g25250 | At4g13000 |
| At3g05130 | At5g27330 |
| At2g20630 | At4g28400 |
| At3g25290 | At4g12980 |
| At3g05160 | At5g27350 |
| At2g20650 | At4g28370 |
| At3g25420 | At4g12910 |
| At2g20680 | At4g28320 |
| At3g42670 | At5g20420 |
| At3g42790 | At5g20510 |
| At2g20700 | At4g28280 |
| At3g42830 | At5g20570 |
| At2g20750 | At4g28250 |
| At3g42880 | At5g20690 |
| At2g20800 | At4g28220 |
| At3g43120 | At5g20810 |
| At2g20825 | At4g28190 |
| At3g43190 | At5g20830 |
| At2g20880 | At4g28140 |
| At3g43220 | At5g20840 |
| At4g26600 | At5g55920 |
| At4g26610 | At5g55910 |
| At4g26620 | At5g55900 |

|           |           |
|-----------|-----------|
| At4g26630 | At5g55660 |
| At4g26650 | At5g55550 |
| At4g26660 | At5g55520 |
| At4g26670 | At5g55510 |
| At4g26690 | At5g55480 |
| At4g26700 | At5g55400 |
| At4g26710 | At5g55290 |
| At5g10650 | At5g24870 |
| At5g10660 | At5g24880 |
| At1g09180 | At1g56330 |
| At5g10740 | At5g24940 |
| At1g09210 | At1g56340 |
| At1g09240 | At1g56430 |
| At5g10750 | At5g24990 |
| At1g09310 | At1g56580 |
| At5g10820 | At5g25050 |
| At1g09350 | At1g56600 |
| At5g10840 | At5g25100 |
| At1g09390 | At1g56670 |
| At5g10930 | At5g25110 |
| At1g09410 | At1g56690 |
| At5g10970 | At5g25160 |
| At1g09440 | At1g56720 |
| At5g11060 | At5g25220 |
| At1g09540 | At1g57560 |
| At1g09550 | At1g57590 |
| At4g26720 | At5g55260 |
| At4g26740 | At5g55240 |
| At4g26760 | At5g55230 |
| At4g26780 | At5g55200 |
| At4g26830 | At5g55180 |
| At4g26840 | At5g55170 |
| At4g26850 | At5g55120 |
| At4g26880 | At5g55110 |
| At4g26890 | At5g55090 |
| At4g26910 | At5g55070 |
| At1g09580 | At1g57620 |
| At1g09590 | At1g57660 |
| At1g09600 | At1g57700 |
| At1g09640 | At1g57720 |
| At1g09860 | At1g57943 |
| At1g09940 | At1g58290 |
| At1g09950 | At1g58330 |
| At1g09980 | At1g58350 |
| At1g10010 | At1g58360 |
| At1g10050 | At1g58370 |
| At4g26930 | At5g55020 |
| At4g26990 | At5g54920 |
| At4g27000 | At5g54900 |
| At4g27020 | At5g54870 |
| At4g27070 | At5g54810 |
| At4g27100 | At5g54780 |
| At4g27130 | At5g54760 |

|           |           |
|-----------|-----------|
| At4g27150 | At5g54740 |
| At4g27180 | At5g54670 |
| At4g27230 | At5g54640 |
| At1g10140 | At1g58420 |
| At1g10150 | At1g59510 |
| At1g10210 | At1g59580 |
| At1g10220 | At1g59590 |
| At1g10290 | At1g59610 |
| At1g10350 | At1g59725 |
| At1g10360 | At1g59700 |
| At1g10390 | At1g59660 |
| At1g10410 | At1g59650 |
| At1g10430 | At1g59830 |
| At4g27240 | At5g54630 |
| At4g27260 | At5g54510 |
| At4g27270 | At5g54500 |
| At4g27280 | At5g54490 |
| At1g15120 | At2g01090 |
| At4g27310 | At5g54470 |
| At1g15280 | At1g80000 |
| At4g27320 | At5g54430 |
| At4g27350 | At5g54240 |
| At1g15330 | At1g80090 |
| At4g27440 | At5g54190 |
| At1g15380 | At1g80160 |
| At4g27460 | At5g53750 |
| At1g15400 | At1g80180 |
| At4g27520 | At5g53870 |
| At1g15430 | At1g80220 |
| At1g15480 | At1g80270 |
| At1g15490 | At1g80280 |
| At1g15500 | At1g80300 |
| At4g27580 | At5g54100 |
| At4g27660 | At5g54150 |
| At4g27680 | At5g53540 |
| At4g27690 | At5g53530 |
| At1g15540 | At1g80320 |
| At4g27730 | At5g53510 |
| At1g15550 | At1g80330 |
| At4g27780 | At5g53470 |
| At1g15570 | At1g80370 |
| At4g27810 | At5g53030 |
| At1g15580 | At1g80390 |
| At4g27840 | At5g52990 |
| At1g15670 | At1g80440 |
| At4g27880 | At5g53360 |
| At1g15730 | At1g80480 |
| At4g27890 | At5g53400 |
| At1g15750 | At1g80490 |
| At1g15760 | At1g80520 |
| At1g15870 | At1g80720 |
| At4g27900 | At5g53420 |
| At4g27910 | At5g53430 |

|           |           |
|-----------|-----------|
| At4g27920 | At5g53160 |
| At4g27950 | At5g53290 |
| At1g15920 | At1g80780 |
| At4g27960 | At5g53300 |
| At1g15940 | At1g80810 |
| At1g15950 | At1g80820 |
| At3g45060 | At5g60780 |
| At1g15960 | At1g80830 |
| At3g45090 | At5g60760 |
| At1g15970 | At1g80850 |
| At3g45210 | At5g60680 |
| At1g16000 | At1g80890 |
| At3g45240 | At5g60550 |
| At1g16010 | At1g80900 |
| At3g45260 | At5g60470 |
| At1g16020 | At1g80910 |
| At1g16060 | At1g79700 |
| At1g16170 | At1g79660 |
| At3g09220 | At5g01050 |
| At3g09240 | At5g01060 |
| At3g09300 | At5g02100 |
| At3g09350 | At5g02150 |
| At3g09370 | At5g02320 |
| At3g09400 | At5g02400 |
| At3g09440 | At5g02490 |
| At3g09480 | At5g02570 |
| At3g09490 | At5g02590 |
| At3g45310 | At5g60360 |
| At3g09500 | At5g02610 |
| At3g45330 | At5g60300 |
| At3g45560 | At5g60250 |
| At1g16190 | At1g79650 |
| At3g45590 | At5g60230 |
| At1g16220 | At1g79630 |
| At3g45600 | At5g60220 |
| At1g16240 | At1g79590 |
| At3g45610 | At5g60200 |
| At1g16270 | At1g79570 |
| At3g45630 | At5g60170 |
| At1g16300 | At1g79530 |
| At3g45810 | At5g60010 |
| At1g16310 | At1g79520 |
| At3g45840 | At5g59920 |
| At3g45980 | At5g59910 |
| At1g16320 | At1g79510 |
| At1g16340 | At1g79500 |
| At1g16350 | At1g79470 |
| At1g16360 | At1g79450 |
| At3g09570 | At5g02630 |
| At3g09590 | At5g02730 |
| At3g09630 | At5g02870 |
| At3g09670 | At5g02950 |
| At3g09680 | At5g02960 |

|           |           |
|-----------|-----------|
| At3g09690 | At5g02970 |
| At3g09700 | At5g03030 |
| At3g09710 | At5g03040 |
| At3g09770 | At5g03200 |
| At3g46010 | At5g59880 |
| At3g09810 | At5g03290 |
| At3g46020 | At5g59860 |
| At3g46040 | At5g59850 |
| At1g16380 | At1g79400 |
| At3g46060 | At5g59840 |
| At1g16420 | At1g79340 |
| At3g46070 | At5g59820 |
| At1g16440 | At1g79250 |
| At3g46110 | At5g59790 |
| At1g16460 | At1g79230 |
| At3g46130 | At5g59780 |
| At1g16470 | At1g79210 |
| At3g46180 | At5g59740 |
| At3g46230 | At5g59720 |
| At3g46440 | At5g59290 |
| At1g16490 | At1g79180 |
| At1g16500 | At1g79160 |
| At1g16510 | At1g79130 |
| At1g16680 | At1g79030 |
| At1g16690 | At1g79020 |
| At3g09820 | At5g03300 |
| At3g09830 | At5g03320 |
| At3g09840 | At5g03340 |
| At3g09880 | At5g03470 |
| At3g09900 | At5g03530 |
| At3g09930 | At5g03610 |
| At3g09940 | At5g03630 |
| At3g09980 | At5g03660 |
| At3g46460 | At5g59300 |
| At3g10000 | At5g03680 |
| At3g46520 | At5g59370 |
| At3g10090 | At5g03850 |
| At3g46580 | At5g59380 |
| At3g46590 | At5g59430 |
| At1g16700 | At1g79010 |
| At3g46600 | At5g59450 |
| At1g16710 | At1g79000 |
| At3g46620 | At5g59550 |
| At1g16760 | At1g78940 |
| At3g46640 | At5g59570 |
| At1g16780 | At1g78920 |
| At3g46760 | At5g59260 |
| At3g46820 | At5g59160 |
| At1g16840 | At1g78890 |
| At3g46830 | At5g59150 |
| At1g16860 | At1g78880 |
| At1g16890 | At1g78870 |
| At1g16980 | At1g78580 |

|           |           |
|-----------|-----------|
| At1g17040 | At1g78540 |
| At1g17050 | At1g78510 |
| At3g10120 | At5g03890 |
| At3g10200 | At5g04060 |
| At3g10250 | At5g04090 |
| At3g10270 | At5g04130 |
| At3g10290 | At5g04160 |
| At3g10300 | At5g04170 |
| At3g10340 | At5g04230 |
| At3g10440 | At5g04320 |
| At3g46840 | At5g59100 |
| At3g10470 | At5g04390 |
| At3g46900 | At5g59030 |
| At3g10500 | At5g04410 |
| At3g46930 | At5g58950 |
| At3g46990 | At5g58930 |
| At1g17100 | At1g78450 |
| At3g47060 | At5g58870 |
| At1g17180 | At1g78380 |
| At3g47160 | At5g58790 |
| At1g17290 | At1g72330 |
| At3g47190 | At5g58660 |
| At3g47300 | At5g58640 |
| At1g17310 | At1g72350 |
| At3g49670 | At5g65700 |
| At3g49680 | At5g65780 |
| At1g17380 | At1g72450 |
| At1g17400 | At1g72490 |
| At1g17420 | At1g72520 |
| At1g17430 | At1g72620 |
| At1g17460 | At1g72650 |
| At3g10540 | At5g04510 |
| At3g10550 | At5g04540 |
| At3g10560 | At5g04660 |
| At3g10580 | At5g04760 |
| At3g10600 | At5g04770 |
| At3g10610 | At5g04800 |
| At3g10640 | At5g04850 |
| At3g10660 | At5g04870 |
| At3g10720 | At5g04970 |
| At3g10730 | At5g04990 |
| At1g17470 | At1g72660 |
| At1g17480 | At1g72670 |
| At1g17500 | At1g72700 |
| At1g17520 | At1g72740 |
| At1g17530 | At1g72750 |
| At1g17540 | At1g72760 |
| At1g17550 | At1g72770 |
| At1g17590 | At1g72830 |
| At1g17710 | At1g73010 |
| At1g17730 | At1g73030 |
| At3g10760 | At5g05090 |
| At3g10770 | At5g05100 |

|           |           |
|-----------|-----------|
| At3g10820 | At5g05140 |
| At3g10860 | At5g05370 |
| At3g10910 | At5g05280 |
| At3g10980 | At5g05350 |
| At3g11020 | At5g05410 |
| At3g11040 | At5g05460 |
| At3g11070 | At5g05520 |
| At3g11100 | At5g05550 |
| At1g17750 | At1g73080 |
| At1g17790 | At1g73150 |
| At1g17810 | At1g73190 |
| At1g17820 | At1g73200 |
| At1g17830 | At1g73210 |
| At1g17880 | At1g73230 |
| At1g17890 | At1g73250 |
| At1g17920 | At1g73360 |
| At1g17940 | At1g73390 |
| At1g17950 | At1g73410 |
| At2g37080 | At3g53350 |
| At2g37160 | At3g53390 |
| At2g37170 | At3g53420 |
| At2g37190 | At3g53430 |
| At2g37210 | At3g53450 |
| At3g11170 | At5g05580 |
| At2g37220 | At3g53460 |
| At3g11180 | At5g05600 |
| At2g37280 | At3g53480 |
| At3g11200 | At5g05610 |
| At2g37340 | At3g53500 |
| At3g11240 | At5g05700 |
| At2g37400 | At3g53560 |
| At3g11260 | At5g05770 |
| At2g37430 | At3g53600 |
| At3g11270 | At5g05780 |
| At3g11280 | At5g05790 |
| At3g11310 | At5g05800 |
| At3g11320 | At5g05820 |
| At3g11330 | At5g05850 |
| At1g17970 | At1g73760 |
| At1g18040 | At1g73690 |
| At1g18150 | At1g73670 |
| At1g18160 | At1g73660 |
| At1g18170 | At1g73650 |
| At1g18200 | At1g73640 |
| At1g18210 | At1g73630 |
| At1g18250 | At1g73620 |
| At1g18260 | At1g73570 |
| At1g18280 | At1g73550 |
| At2g37470 | At3g53650 |
| At2g37520 | At3g53680 |
| At2g37550 | At3g53710 |
| At2g37600 | At3g53740 |
| At3g11340 | At5g05870 |

|           |           |
|-----------|-----------|
| At2g37620 | At3g53750 |
| At3g11400 | At5g06000 |
| At2g37710 | At3g53810 |
| At3g11430 | At5g06090 |
| At2g37790 | At3g53880 |
| At3g11440 | At5g06100 |
| At3g11450 | At5g06110 |
| At2g37890 | At3g53940 |
| At3g11520 | At5g06150 |
| At3g11550 | At5g06200 |
| At3g11560 | At5g06220 |
| At3g11570 | At5g06230 |
| At3g11580 | At5g06250 |
| At2g37900 | At3g53960 |
| At2g37940 | At3g54020 |
| At2g37960 | At3g54060 |
| At2g37980 | At3g54100 |
| At2g38100 | At3g54140 |
| At3g11600 | At5g06270 |
| At2g38320 | At3g54260 |
| At3g11630 | At5g06290 |
| At2g38430 | At3g54310 |
| At3g11650 | At5g06320 |
| At2g38620 | At3g54180 |
| At3g11660 | At5g06330 |
| At2g38630 | At3g54190 |
| At3g11700 | At5g06390 |
| At2g38700 | At3g54250 |
| At3g11720 | At5g06440 |
| At3g11770 | At5g06450 |
| At3g11780 | At5g06480 |
| At3g11850 | At5g06560 |
| At3g11910 | At5g06600 |
| At2g38820 | At3g54550 |
| At2g38860 | At3g54600 |
| At2g38940 | At3g54700 |
| At2g38970 | At3g54780 |
| At2g39010 | At3g54820 |
| At3g12030 | At5g06660 |
| At2g39130 | At3g54830 |
| At3g12060 | At5g06700 |
| At2g39220 | At3g54950 |
| At3g12130 | At5g06770 |
| At2g39230 | At3g54980 |
| At3g12140 | At5g06780 |
| At2g39250 | At3g54990 |
| At3g12170 | At5g06910 |
| At2g39290 | At3g55030 |
| At3g12250 | At5g06950 |
| At3g12320 | At5g06980 |
| At1g48020 | At3g17220 |
| At1g48030 | At3g17240 |
| At1g48040 | At3g17250 |

|           |           |
|-----------|-----------|
| At2g39300 | At3g55060 |
| At2g39350 | At3g55130 |
| At2g39380 | At3g55150 |
| At2g39390 | At3g55170 |
| At2g39420 | At3g55190 |
| At2g39430 | At3g55230 |
| At2g39460 | At3g55280 |
| At2g39480 | At3g55320 |
| At2g39640 | At3g55430 |
| At2g39770 | At3g55590 |
| At2g39790 | At3g55600 |
| At2g39800 | At3g55610 |
| At2g39820 | At3g55620 |
| At2g39880 | At3g55730 |
| At2g39890 | At3g55740 |
| At2g39900 | At3g55770 |
| At2g40000 | At3g55840 |
| At2g40110 | At3g55890 |
| At2g40140 | At3g55980 |
| At2g40160 | At3g55990 |
| At2g40240 | At3g56030 |
| At2g40280 | At3g56080 |
| At2g40300 | At3g56090 |
| At2g40380 | At3g56110 |
| At2g40400 | At3g56140 |
| At2g40410 | At3g56170 |
| At2g40420 | At3g56200 |
| At2g40480 | At3g56270 |
| At2g40520 | At3g56320 |
| At2g40670 | At3g56380 |
| At2g40750 | At3g56400 |
| At2g40800 | At3g56430 |
| At2g40810 | At3g56440 |
| At2g40820 | At3g56480 |
| At2g40850 | At3g56600 |
| At2g40900 | At3g56620 |
| At2g40950 | At3g56660 |
| At2g40960 | At3g56680 |
| At2g40990 | At3g56930 |
| At2g41010 | At3g56880 |
| At2g41060 | At3g56860 |
| At2g41070 | At3g56850 |
| At2g41100 | At3g56800 |
| At2g41130 | At3g56770 |
| At2g41140 | At3g56760 |
| At2g41150 | At3g56750 |
| At2g41210 | At3g56960 |
| At2g41240 | At3g56980 |
| At2g41300 | At3g57010 |
| At2g41310 | At3g57040 |
| At2g41330 | At3g57070 |
| At2g41340 | At3g57080 |
| At2g41370 | At3g57130 |

|           |           |
|-----------|-----------|
| At2g41490 | At3g57220 |
| At2g41560 | At3g57330 |
| At2g41620 | At3g57350 |
| At2g41630 | At3g57370 |
| At2g41640 | At3g57380 |
| At2g41740 | At3g57410 |
| At2g41770 | At3g57420 |
| At5g11090 | At5g25280 |
| At5g11190 | At5g25390 |
| At5g11230 | At5g25400 |
| At5g11420 | At5g25460 |
| At5g11430 | At5g25520 |
| At5g11440 | At5g25540 |
| At5g11590 | At5g25810 |
| At5g11610 | At5g25820 |
| At5g11670 | At5g25880 |
| At5g11730 | At5g25970 |
| At5g12000 | At5g26150 |
| At5g12870 | At5g26660 |
| At2g23810 | At4g30430 |
| At2g23910 | At4g30470 |
| At2g23940 | At4g30500 |
| At2g23970 | At4g30530 |
| At2g23980 | At4g30560 |
| At2g23990 | At4g30590 |
| At2g24000 | At4g30610 |
| At2g24020 | At4g30620 |
| At2g24040 | At4g30650 |
| At2g24060 | At4g30690 |
| At2g24070 | At4g30710 |
| At2g24100 | At4g30780 |
| At2g24140 | At4g30830 |
| At2g24150 | At4g30850 |
| At2g24200 | At4g30920 |
| At2g24240 | At4g30940 |
| At2g24260 | At4g30980 |
| At2g24300 | At4g31000 |
| At2g24320 | At4g31020 |
| At2g24330 | At4g31090 |
| At2g24360 | At4g31170 |
| At2g24370 | At4g31230 |
| At2g24390 | At4g31310 |
| At2g24400 | At4g31320 |
| At2g24420 | At4g31340 |
| At2g24450 | At4g31370 |
| At2g24500 | At4g31420 |
| At2g24530 | At4g31440 |
| At2g24570 | At4g31550 |
| At2g24590 | At4g31580 |
| At2g24630 | At4g31590 |
| At2g24650 | At4g31620 |
| At2g24720 | At4g31710 |
| At2g24800 | At4g31760 |

|           |           |
|-----------|-----------|
| At2g25060 | At4g31840 |
| At2g25070 | At4g31860 |
| At2g25080 | At4g31870 |
| At2g25130 | At4g31890 |
| At2g25170 | At4g31900 |
| At2g25180 | At4g31920 |
| At2g25220 | At4g32000 |
| At2g25290 | At4g32070 |
| At2g25300 | At4g32120 |
| At2g25310 | At4g32130 |
| At2g25340 | At4g32150 |
| At2g25350 | At4g32160 |
| At2g25430 | At4g32280 |
| At2g25480 | At4g32330 |
| At2g25520 | At4g32390 |
| At2g25540 | At4g32410 |
| At2g25590 | At4g32440 |
| At2g25600 | At4g32500 |
| At2g25610 | At4g32530 |
| At2g25670 | At4g32610 |
| At2g25820 | At4g32800 |
| At2g25850 | At4g32850 |
| At2g25880 | At4g32830 |
| At2g25940 | At4g32940 |
| At2g26060 | At4g32990 |
| At2g26080 | At4g33010 |
| At2g26190 | At4g33050 |
| At2g26440 | At4g33230 |
| At2g26570 | At4g33390 |
| At1g24735 | At1g67980 |
| At1g24764 | At1g68060 |
| At1g25240 | At1g68110 |
| At1g25250 | At1g68130 |
| At1g25270 | At1g68170 |
| At1g25340 | At1g68320 |
| At1g25400 | At1g68440 |
| At1g25410 | At1g68460 |
| At1g25440 | At1g68520 |
| At1g25450 | At1g68530 |
| At1g25460 | At1g68540 |
| At1g25470 | At1g68550 |
| At1g25480 | At1g68600 |
| At1g25520 | At1g68650 |
| At1g25550 | At1g68670 |
| At3g49690 | At5g65790 |
| At3g49700 | At5g65800 |
| At3g49720 | At5g65810 |
| At3g49730 | At5g65820 |
| At3g49750 | At5g65830 |
| At3g49800 | At5g65910 |
| At3g49810 | At5g65920 |
| At3g49830 | At5g67630 |
| At3g49840 | At5g67610 |

|           |           |
|-----------|-----------|
| At3g49850 | At5g67580 |
| At1g25560 | At1g68840 |
| At1g26260 | At1g68920 |
| At1g26310 | At1g69120 |
| At1g26360 | At1g69240 |
| At1g26620 | At1g69360 |
| At1g26630 | At1g69410 |
| At1g26650 | At1g69430 |
| At1g26690 | At1g69460 |
| At1g26770 | At1g69530 |
| At1g26780 | At1g69560 |
| At3g49870 | At5g67560 |
| At3g49880 | At5g67540 |
| At3g49910 | At5g67510 |
| At3g49920 | At5g67500 |
| At3g49930 | At5g67450 |
| At3g49940 | At5g67420 |
| At3g49960 | At5g67400 |
| At3g50000 | At5g67380 |
| At3g50060 | At5g67300 |
| At3g50070 | At5g67260 |
| At3g50080 | At5g67250 |
| At3g50100 | At5g67240 |
| At3g50220 | At5g67210 |
| At3g50230 | At5g67200 |
| At3g50260 | At5g67190 |
| At3g50310 | At5g67080 |
| At3g50330 | At5g67060 |
| At3g50340 | At5g67020 |
| At3g50410 | At5g66940 |
| At3g50500 | At5g66880 |
| At3g50510 | At5g66870 |
| At3g50640 | At5g66800 |
| At3g50650 | At5g66770 |
| At1g18300 | At1g73540 |
| At3g50700 | At5g66730 |
| At1g18350 | At1g73500 |
| At3g50720 | At5g66710 |
| At1g18360 | At1g73480 |
| At3g50740 | At5g66690 |
| At1g18400 | At1g73830 |
| At3g50800 | At5g66580 |
| At1g18410 | At1g73860 |
| At3g50820 | At5g66570 |
| At1g18460 | At1g73920 |
| At3g50840 | At5g66560 |
| At1g18470 | At1g73950 |
| At1g18500 | At1g74040 |
| At1g18540 | At1g74050 |
| At1g18570 | At1g74080 |
| At3g50900 | At5g66490 |
| At3g50910 | At5g66480 |
| At3g50920 | At5g66450 |

|           |           |
|-----------|-----------|
| At3g50960 | At5g66410 |
| At1g18590 | At1g74090 |
| At3g50990 | At5g66390 |
| At1g18600 | At1g74130 |
| At3g51020 | At5g66370 |
| At1g18610 | At1g74150 |
| At3g51060 | At5g66350 |
| At1g18620 | At1g74160 |
| At3g51080 | At5g66320 |
| At1g18670 | At1g74330 |
| At3g51150 | At5g66310 |
| At1g18690 | At1g74380 |
| At3g51160 | At5g66280 |
| At1g18720 | At1g74440 |
| At1g18740 | At1g74450 |
| At1g18790 | At1g74480 |
| At1g18800 | At1g74560 |
| At3g51180 | At5g66270 |
| At3g51200 | At5g66260 |
| At3g51230 | At5g66230 |
| At3g51260 | At5g66140 |
| At1g18840 | At1g74690 |
| At3g51370 | At5g66080 |
| At1g18870 | At1g74710 |
| At3g51460 | At5g66020 |
| At1g18890 | At1g74740 |
| At4g03820 | At4g22270 |
| At1g18910 | At1g74760 |
| At4g04020 | At4g22240 |
| At1g18920 | At1g74770 |
| At4g04080 | At4g22220 |
| At1g18940 | At1g74780 |
| At4g04210 | At4g22150 |
| At1g18990 | At1g74830 |
| At1g19000 | At1g74840 |
| At1g19010 | At1g74860 |
| At1g19050 | At1g74890 |
| At1g48110 | At3g17330 |
| At1g48230 | At3g17430 |
| At1g48240 | At3g17440 |
| At1g48260 | At3g17510 |
| At1g48330 | At3g17580 |
| At1g48370 | At3g17650 |
| At1g48430 | At3g17770 |
| At1g48440 | At3g17780 |
| At4g04260 | At4g22140 |
| At1g48450 | At3g17800 |
| At4g04340 | At4g22120 |
| At1g48470 | At3g17820 |
| At4g04450 | At4g22070 |
| At4g04480 | At4g22030 |
| At1g19180 | At1g74950 |
| At4g04610 | At4g21990 |

|           |           |
|-----------|-----------|
| At1g19310 | At1g74990 |
| At4g04620 | At4g21980 |
| At1g19320 | At1g75050 |
| At4g04630 | At4g21970 |
| At1g19330 | At1g75060 |
| At4g04710 | At4g21940 |
| At1g19350 | At1g75080 |
| At4g04790 | At4g21880 |
| At4g04840 | At4g21840 |
| At1g19360 | At1g75110 |
| At1g19370 | At1g75140 |
| At1g19400 | At1g75180 |
| At1g19450 | At1g75220 |
| At1g19570 | At1g75270 |
| At1g48480 | At3g17840 |
| At1g48490 | At3g17850 |
| At1g48500 | At3g17860 |
| At1g48510 | At3g17910 |
| At1g48540 | At3g17920 |
| At1g48590 | At3g17980 |
| At1g48600 | At3g18000 |
| At1g48610 | At3g18030 |
| At4g04860 | At4g21810 |
| At1g48620 | At3g18035 |
| At4g04890 | At4g21750 |
| At1g48630 | At3g18130 |
| At4g05000 | At4g21560 |
| At4g05020 | At4g21490 |
| At1g19650 | At1g75370 |
| At4g05060 | At4g21450 |
| At1g19660 | At1g75380 |
| At4g05100 | At4g21440 |
| At1g19680 | At1g75400 |
| At4g05180 | At4g21280 |
| At1g19700 | At1g75410 |
| At4g05190 | At4g21270 |
| At4g05210 | At4g21220 |
| At1g19710 | At1g75420 |
| At4g05330 | At4g21160 |
| At1g19740 | At1g75460 |
| At1g19770 | At1g75470 |
| At1g19790 | At1g75520 |
| At1g19830 | At1g75580 |
| At1g19840 | At1g75590 |
| At1g48740 | At3g18210 |
| At1g48770 | At3g18295 |
| At1g48780 | At3g18300 |
| At1g48840 | At3g18350 |
| At1g48920 | At3g18610 |
| At1g48940 | At3g18590 |
| At1g48990 | At3g18570 |
| At1g49000 | At3g18560 |
| At4g05400 | At4g21140 |

|           |           |
|-----------|-----------|
| At1g49030 | At3g18450 |
| At4g05410 | At4g21130 |
| At1g49140 | At3g18410 |
| At4g05420 | At4g21100 |
| At4g05450 | At4g21090 |
| At1g19890 | At1g75600 |
| At1g32760 | At4g10630 |
| At1g19900 | At1g75620 |
| At1g32790 | At4g10610 |
| At1g19910 | At1g75630 |
| At1g32800 | At4g10600 |
| At1g32850 | At4g10590 |
| At1g19940 | At1g75680 |
| At1g32960 | At4g10550 |
| At1g19950 | At1g75700 |
| At1g33040 | At4g10480 |
| At1g19970 | At1g75760 |
| At1g20010 | At1g75780 |
| At1g20030 | At1g75800 |
| At1g20090 | At1g75840 |
| At1g20100 | At1g75860 |
| At1g49160 | At3g18750 |
| At1g49240 | At3g18780 |
| At1g49300 | At3g18820 |
| At1g49400 | At3g18880 |
| At1g49450 | At3g18950 |
| At1g49480 | At3g18990 |
| At1g49490 | At3g19020 |
| At1g49520 | At3g19080 |
| At1g49580 | At3g19100 |
| At1g33050 | At4g10470 |
| At1g49600 | At3g19130 |
| At1g33120 | At4g10450 |
| At1g33170 | At4g10440 |
| At1g33230 | At4g10430 |
| At1g20200 | At1g75990 |
| At1g33260 | At4g10390 |
| At1g20220 | At1g76010 |
| At1g33480 | At4g10150 |
| At1g33490 | At4g10140 |
| At1g20260 | At1g76030 |
| At1g33700 | At4g10060 |
| At1g20310 | At1g76070 |
| At1g33770 | At4g10010 |
| At1g20330 | At1g76090 |
| At1g33800 | At4g09990 |
| At1g20340 | At1g76100 |
| At1g20370 | At1g76120 |
| At1g20380 | At1g76140 |
| At1g20470 | At1g76190 |
| At1g20520 | At1g76210 |
| At1g49630 | At3g19170 |
| At1g49710 | At3g19280 |

|           |           |
|-----------|-----------|
| At1g49720 | At3g19290 |
| At1g49730 | At3g19300 |
| At1g49740 | At3g19310 |
| At1g49750 | At3g19320 |
| At1g49780 | At3g19380 |
| At1g49810 | At3g19490 |
| At1g49840 | At3g19540 |
| At1g49890 | At3g19570 |
| At1g20540 | At1g76260 |
| At1g20550 | At1g76270 |
| At1g20580 | At1g76300 |
| At1g20610 | At1g76310 |
| At1g20640 | At1g76350 |
| At1g20650 | At1g76360 |
| At1g20670 | At1g76380 |
| At1g20780 | At1g76390 |
| At1g20823 | At1g76410 |
| At1g20860 | At1g76430 |
| At1g49910 | At3g19590 |
| At1g50040 | At3g19680 |
| At1g50050 | At3g19690 |
| At1g50090 | At3g19710 |
| At1g50140 | At3g19740 |
| At1g50150 | At3g19750 |
| At1g50260 | At3g19830 |
| At1g50280 | At3g19850 |
| At1g50310 | At3g19930 |
| At1g50350 | At3g19950 |
| At1g20880 | At1g76460 |
| At1g20890 | At1g76480 |
| At1g20900 | At1g76500 |
| At1g20910 | At1g76510 |
| At1g20930 | At1g76540 |
| At1g20950 | At1g76550 |
| At1g20980 | At1g76580 |
| At1g21000 | At1g76590 |
| At1g21010 | At1g76600 |
| At1g21050 | At1g76610 |
| At2g41790 | At3g57470 |
| At2g41840 | At3g57490 |
| At2g41850 | At3g57510 |
| At2g41860 | At3g57530 |
| At1g50360 | At3g19960 |
| At2g41870 | At3g57540 |
| At1g50370 | At3g19980 |
| At2g41880 | At3g57550 |
| At1g50400 | At3g20000 |
| At2g41940 | At3g58070 |
| At1g50410 | At3g20010 |
| At2g41960 | At3g58050 |
| At1g50460 | At3g20040 |
| At2g41980 | At3g58040 |
| At1g50490 | At3g20060 |

|           |           |
|-----------|-----------|
| At2g42030 | At3g58030 |
| At1g50610 | At3g20190 |
| At1g50620 | At3g20280 |
| At1g50630 | At3g20300 |
| At1g50640 | At3g20310 |
| At1g21060 | At1g76620 |
| At1g21070 | At1g76670 |
| At1g21080 | At1g76700 |
| At1g21160 | At1g76810 |
| At1g21170 | At1g76850 |
| At1g21190 | At1g76860 |
| At1g21200 | At1g76870 |
| At1g21380 | At1g76970 |
| At1g21390 | At1g76980 |
| At1g21410 | At1g77000 |
| At2g42130 | At3g58010 |
| At2g42140 | At3g58000 |
| At2g42150 | At3g57980 |
| At2g42190 | At3g57930 |
| At1g50660 | At3g20350 |
| At2g42200 | At3g57920 |
| At1g50700 | At3g20410 |
| At2g42230 | At3g57890 |
| At1g50740 | At3g20510 |
| At1g10450 | At1g59890 |
| At2g42260 | At3g57860 |
| At1g50840 | At3g20540 |
| At1g10470 | At1g59940 |
| At2g42290 | At3g57830 |
| At1g50950 | At3g20560 |
| At1g10530 | At1g60010 |
| At2g42300 | At3g57800 |
| At1g51060 | At3g20670 |
| At1g10540 | At1g60030 |
| At2g42320 | At3g57780 |
| At1g51130 | At3g20760 |
| At1g10560 | At1g60190 |
| At1g51170 | At3g20830 |
| At1g10570 | At1g60220 |
| At1g51190 | At3g20840 |
| At1g10640 | At1g60590 |
| At1g51220 | At3g20880 |
| At1g10650 | At1g60610 |
| At1g10670 | At1g60810 |
| At1g10730 | At1g60780 |
| At2g42370 | At3g58110 |
| At2g42380 | At3g58120 |
| At2g42430 | At3g58190 |
| At2g42500 | At3g58500 |
| At1g51390 | At3g20970 |
| At2g42520 | At3g58570 |
| At1g51500 | At3g21090 |
| At2g42580 | At3g58620 |

|           |           |
|-----------|-----------|
| At1g51520 | At3g21100 |
| At1g10770 | At1g60760 |
| At2g42650 | At3g58660 |
| At1g51560 | At3g21140 |
| At1g10810 | At1g60690 |
| At2g42670 | At3g58670 |
| At1g51590 | At3g21160 |
| At1g10820 | At1g60670 |
| At2g42680 | At3g58680 |
| At1g51630 | At3g21190 |
| At2g42740 | At3g58700 |
| At1g51660 | At3g21220 |
| At1g10870 | At1g60860 |
| At1g51680 | At3g21230 |
| At1g10900 | At1g60890 |
| At1g51700 | At3g21270 |
| At1g10930 | At1g60930 |
| At1g51710 | At3g21280 |
| At1g10940 | At1g60940 |
| At1g10960 | At1g60950 |
| At1g10970 | At1g60960 |
| At2g42790 | At3g58750 |
| At2g42830 | At3g58780 |
| At2g42870 | At3g58850 |
| At2g42980 | At3g59080 |
| At1g51770 | At3g21310 |
| At2g43010 | At3g59060 |
| At1g51800 | At3g21340 |
| At2g43020 | At3g59050 |
| At1g11060 | At1g61030 |
| At2g43050 | At3g59010 |
| At1g66160 | At5g37490 |
| At1g11070 | At1g61080 |
| At2g43100 | At3g58990 |
| At1g66180 | At5g37540 |
| At1g11080 | At1g61130 |
| At2g43160 | At3g59290 |
| At1g66190 | At5g37550 |
| At1g11100 | At1g61140 |
| At2g43240 | At3g59360 |
| At1g66200 | At5g37600 |
| At1g11120 | At1g61170 |
| At1g66260 | At5g37720 |
| At1g66360 | At5g37740 |
| At1g11170 | At1g61240 |
| At1g66410 | At5g37780 |
| At1g11180 | At1g61250 |
| At1g11220 | At1g61260 |
| At1g11250 | At1g61290 |
| At2g43290 | At3g59440 |
| At2g43460 | At3g59540 |
| At2g43490 | At3g59570 |
| At2g43500 | At3g59580 |

|           |           |
|-----------|-----------|
| At2g43630 | At3g59640 |
| At2g43680 | At3g59690 |
| At1g11310 | At1g61560 |
| At2g43690 | At3g59700 |
| At1g11390 | At1g61640 |
| At2g43750 | At3g59760 |
| At1g11510 | At1g61730 |
| At2g43790 | At3g59790 |
| At1g11540 | At1g61740 |
| At2g43810 | At3g59810 |
| At1g11560 | At1g61790 |
| At1g11630 | At1g61870 |
| At1g11670 | At1g61890 |
| At1g11700 | At1g61930 |
| At1g11740 | At1g62050 |
| At1g11910 | At1g62290 |
| At2g43850 | At3g59830 |
| At2g43860 | At3g59850 |
| At2g43940 | At3g59870 |
| At2g44040 | At3g59890 |
| At2g44090 | At3g59910 |
| At2g44100 | At3g59920 |
| At1g11950 | At1g62310 |
| At2g44130 | At3g59940 |
| At1g11960 | At1g62320 |
| At2g44140 | At3g59950 |
| At1g11990 | At1g62330 |
| At2g44150 | At3g59960 |
| At1g12010 | At1g62380 |
| At2g44160 | At3g59970 |
| At1g12030 | At1g62420 |
| At1g12040 | At1g62440 |
| At1g12070 | At1g62450 |
| At1g12090 | At1g62510 |
| At1g12120 | At1g62530 |
| At1g12240 | At1g62660 |
| At2g44180 | At3g59990 |
| At2g44190 | At3g60000 |
| At2g44280 | At3g60070 |
| At2g44350 | At3g60100 |
| At2g44430 | At3g60110 |
| At2g44470 | At3g60140 |
| At1g12260 | At1g62700 |
| At2g44525 | At3g60150 |
| At1g12270 | At1g62740 |
| At2g44590 | At3g60190 |
| At1g12310 | At1g62820 |
| At2g44600 | At3g60200 |
| At1g12320 | At1g62840 |
| At2g44650 | At3g60210 |
| At1g12380 | At1g62870 |
| At1g12390 | At1g62880 |
| At1g12460 | At1g62950 |

|           |           |
|-----------|-----------|
| At1g12560 | At1g62980 |
| At1g12610 | At1g63030 |
| At2g44680 | At3g60250 |
| At2g44770 | At3g60260 |
| At2g44790 | At3g60280 |
| At2g44800 | At3g60290 |
| At2g44900 | At3g60350 |
| At2g44910 | At3g60390 |
| At1g12640 | At1g63050 |
| At2g44930 | At3g60470 |
| At1g12710 | At1g63090 |
| At2g44940 | At3g60490 |
| At1g12730 | At1g63110 |
| At2g45050 | At3g60530 |
| At1g12750 | At1g63120 |
| At2g45070 | At3g60540 |
| At1g12760 | At1g63170 |
| At1g12780 | At1g63180 |
| At2g13800 | At4g33430 |
| At2g14120 | At4g33650 |
| At2g14520 | At4g33700 |
| At2g14580 | At4g33730 |
| At2g45080 | At3g60550 |
| At2g45110 | At3g60570 |
| At2g45120 | At3g60580 |
| At2g45140 | At3g60600 |
| At2g45150 | At3g60620 |
| At2g45160 | At3g60630 |
| At2g14690 | At4g33840 |
| At2g45170 | At3g60640 |
| At2g14760 | At4g33880 |
| At2g45210 | At3g60690 |
| At2g14850 | At4g33890 |
| At2g45220 | At3g60730 |
| At2g14880 | At4g34290 |
| At2g45290 | At3g60750 |
| At2g15090 | At4g34250 |
| At2g15300 | At4g34220 |
| At2g15530 | At4g34040 |
| At2g15880 | At4g33970 |
| At2g16090 | At4g34370 |
| At2g16230 | At4g34480 |
| At2g45360 | At3g60780 |
| At2g45430 | At3g60870 |
| At2g45440 | At3g60880 |
| At2g45470 | At3g60900 |
| At2g45540 | At3g60920 |
| At2g45740 | At3g61070 |
| At2g16280 | At4g34520 |
| At2g45760 | At3g61190 |
| At2g45800 | At3g61230 |
| At2g16370 | At4g34570 |
| At2g45810 | At3g61240 |

|           |           |
|-----------|-----------|
| At2g16380 | At4g34580 |
| At2g45820 | At3g61260 |
| At2g16400 | At4g34610 |
| At2g16500 | At4g34710 |
| At2g16510 | At4g34720 |
| At2g16570 | At4g34740 |
| At2g16580 | At4g34760 |
| At2g16660 | At4g34950 |
| At2g21510 | At4g39150 |
| At2g21520 | At4g39170 |
| At2g21560 | At4g39190 |
| At2g21580 | At4g39200 |
| At2g21590 | At4g39210 |
| At2g21600 | At4g39220 |
| At2g21650 | At4g39250 |
| At2g21660 | At4g39260 |
| At2g21730 | At4g39330 |
| At2g21740 | At4g39340 |
| At2g16700 | At4g34970 |
| At2g16720 | At4g34990 |
| At2g16730 | At4g35010 |
| At2g16750 | At4g35030 |
| At2g16770 | At4g35040 |
| At2g16780 | At4g35050 |
| At2g16800 | At4g35080 |
| At2g16850 | At4g35100 |
| At2g16900 | At4g35110 |
| At2g17070 | At4g35200 |
| At2g21770 | At4g39350 |
| At2g21910 | At4g39480 |
| At2g21940 | At4g39540 |
| At2g21990 | At4g39610 |
| At2g22170 | At4g39730 |
| At2g22190 | At4g39770 |
| At2g22200 | At4g39780 |
| At2g22240 | At4g39800 |
| At2g22270 | At4g39860 |
| At2g22310 | At4g39910 |
| At2g22330 | At4g39950 |
| At2g22360 | At4g39960 |
| At2g22400 | At4g40000 |
| At2g22430 | At4g40060 |
| At1g01010 | At4g01550 |
| At1g01030 | At4g01500 |
| At1g01050 | At4g01480 |
| At1g01070 | At4g01430 |
| At1g01100 | At4g00810 |
| At1g01110 | At4g00820 |
| At1g01160 | At4g00850 |
| At1g01170 | At4g00860 |
| At1g26790 | At1g69570 |
| At1g01340 | At4g01010 |
| At1g26880 | At1g69620 |

|           |           |
|-----------|-----------|
| At1g01420 | At4g01070 |
| At1g26920 | At1g69760 |
| At1g01430 | At4g01080 |
| At1g26960 | At1g69780 |
| At1g01440 | At4g01090 |
| At1g27040 | At1g69870 |
| At1g01460 | At4g01190 |
| At1g01520 | At4g01280 |
| At3g26890 | At5g41110 |
| At1g01540 | At4g01330 |
| At3g26910 | At5g41100 |
| At3g26932 | At5g41070 |
| At3g26960 | At5g41050 |
| At3g27010 | At5g41030 |
| At1g01550 | At4g01360 |
| At1g01570 | At4g00300 |
| At1g01600 | At4g00360 |
| At1g01610 | At4g00400 |
| At3g27020 | At5g41000 |
| At1g01620 | At4g00430 |
| At3g27080 | At5g40930 |
| At1g01700 | At4g00460 |
| At3g27170 | At5g40890 |
| At1g01740 | At4g00710 |
| At3g27190 | At5g40870 |
| At1g01790 | At4g00630 |
| At3g27230 | At5g40820 |
| At1g02000 | At4g00110 |
| At3g27240 | At5g40810 |
| At1g02050 | At4g00040 |
| At3g27250 | At5g40790 |
| At3g27280 | At5g40770 |
| At3g27300 | At5g40760 |
| At3g27330 | At5g40720 |
| At1g02300 | At4g01610 |
| At1g02360 | At4g01700 |
| At1g02370 | At4g01990 |
| At1g02380 | At4g01960 |
| At3g27350 | At5g40700 |
| At1g02390 | At4g01950 |
| At3g27380 | At5g40650 |
| At1g02460 | At4g01890 |
| At3g27390 | At5g40640 |
| At1g02500 | At4g01850 |
| At3g27420 | At5g40600 |
| At1g02510 | At4g01840 |
| At3g27430 | At5g40580 |
| At1g02520 | At4g01830 |
| At3g27460 | At5g40550 |
| At1g02620 | At4g02080 |
| At3g27560 | At5g40540 |
| At3g27570 | At5g40510 |
| At3g27660 | At5g40420 |

|           |           |
|-----------|-----------|
| At3g05190 | At5g27410 |
| At3g05200 | At5g27420 |
| At3g05230 | At5g27430 |
| At3g05280 | At5g27490 |
| At3g05290 | At5g27520 |
| At3g05310 | At5g27540 |
| At3g05380 | At5g27610 |
| At3g05420 | At5g27630 |
| At1g02650 | At4g02100 |
| At3g05430 | At5g27650 |
| At1g02720 | At4g02130 |
| At3g05550 | At5g27760 |
| At1g02750 | At4g02200 |
| At1g02780 | At4g02230 |
| At3g27860 | At5g40340 |
| At1g02800 | At4g02290 |
| At3g27970 | At5g40310 |
| At1g02810 | At4g02330 |
| At3g28050 | At5g40230 |
| At1g02840 | At4g02430 |
| At3g28140 | At5g40190 |
| At1g02890 | At4g02480 |
| At3g28200 | At5g40150 |
| At1g02940 | At4g02520 |
| At3g28500 | At5g40040 |
| At1g02980 | At4g02570 |
| At3g28510 | At5g40010 |
| At3g28750 | At5g39880 |
| At3g28920 | At5g39760 |
| At3g28930 | At5g39730 |
| At3g05560 | At5g27770 |
| At3g05580 | At5g27840 |
| At3g05590 | At5g27850 |
| At3g05610 | At5g27870 |
| At3g05640 | At5g27930 |
| At3g05660 | At5g27060 |
| At3g05700 | At5g26990 |
| At3g05710 | At5g26980 |
| At1g03040 | At4g02590 |
| At3g05750 | At5g26910 |
| At1g03050 | At4g02650 |
| At3g05790 | At5g26860 |
| At1g03060 | At4g02660 |
| At1g03070 | At4g02690 |
| At3g29000 | At5g39670 |
| At1g03080 | At4g02710 |
| At3g29020 | At5g39700 |
| At1g03130 | At4g02770 |
| At3g29035 | At5g39610 |
| At1g03170 | At4g02810 |
| At3g29075 | At5g39570 |
| At1g03210 | At4g02850 |
| At3g29100 | At5g39510 |

|           |           |
|-----------|-----------|
| At1g03290 | At4g02880 |
| At3g29160 | At5g39440 |
| At1g03340 | At4g02920 |
| At3g29180 | At5g39430 |
| At3g29350 | At5g39340 |
| At3g29360 | At5g39320 |
| At3g06490 | At5g49620 |
| At3g05830 | At5g26770 |
| At3g05840 | At5g26751 |
| At3g05920 | At5g26690 |
| At3g05940 | At5g26740 |
| At3g05950 | At5g26700 |
| At3g05960 | At5g26340 |
| At3g44260 | At5g22250 |
| At1g03440 | At4g03010 |
| At3g44280 | At5g22280 |
| At1g03445 | At4g03080 |
| At3g44290 | At5g22290 |
| At1g03457 | At4g03110 |
| At1g03520 | At4g03340 |
| At3g06620 | At5g49470 |
| At1g03610 | At4g03420 |
| At3g06650 | At5g49460 |
| At1g03670 | At4g03440 |
| At3g06720 | At5g49310 |
| At1g03680 | At4g03520 |
| At3g06740 | At5g49300 |
| At1g03700 | At4g03540 |
| At3g06760 | At5g49230 |
| At1g03730 | At4g03600 |
| At3g06830 | At5g49180 |
| At1g45000 | At5g43010 |
| At3g06930 | At5g49020 |
| At3g07010 | At5g48900 |
| At3g07110 | At5g48760 |
| At3g07170 | At5g48680 |
| At3g44310 | At5g22300 |
| At3g44350 | At5g22380 |
| At3g44540 | At5g22500 |
| At3g44710 | At5g22560 |
| At3g44720 | At5g22630 |
| At3g44750 | At5g22650 |
| At3g44850 | At5g22840 |
| At3g44900 | At5g22900 |
| At1g45050 | At5g42990 |
| At3g44940 | At5g22930 |
| At1g45145 | At5g42980 |
| At3g45000 | At5g22950 |
| At1g45170 | At5g42960 |
| At1g45180 | At5g42940 |
| At3g07190 | At5g48660 |
| At1g45545 | At5g42880 |
| At1g45688 | At5g42860 |

|           |           |
|-----------|-----------|
| At3g07310 | At5g48590 |
| At1g47128 | At5g43060 |
| At3g07340 | At5g48560 |
| At1g47200 | At5g43070 |
| At3g07520 | At5g48400 |
| At1g47210 | At5g43080 |
| At3g47370 | At5g62300 |
| At3g07540 | At5g48360 |
| At3g07600 | At5g48290 |
| At3g07650 | At5g48250 |
| At3g07720 | At5g48180 |
| At3g07780 | At5g48160 |
| At3g45010 | At5g22980 |
| At4g17190 | At5g47770 |
| At4g17250 | At5g47580 |
| At4g17270 | At5g47540 |
| At4g17280 | At5g47530 |
| At4g17340 | At5g47450 |
| At4g17410 | At5g47430 |
| At4g17420 | At5g47420 |
| At4g17486 | At5g47310 |
| At4g17490 | At5g47230 |
