# Supplementary material for: High Rate of Recent Intron Gain and Loss in Simultaneously Duplicated Arabidopsis Genes
Source: Oxford University Press journal article supplement (doi:10.1093/molbev/msl017), 2006-05-23
Supplement: msl017_Supplementary_Data.zip [file msl017_Supplementary_Data.zip › msl017SuppTable2.pdf]

Supplementary Table 2: All identified non-conserved introns

| GeneA     | GeneB     | DescriptionA                                                                                                                                         | DescriptionB                                                                                                                                                                                 | Intron_number * | Event       |
|-----------|-----------|------------------------------------------------------------------------------------------------------------------------------------------------------|----------------------------------------------------------------------------------------------------------------------------------------------------------------------------------------------|-----------------|-------------|
| At3g21500 | At4g15560 | 1-deoxy-D-xylulose 5-phosphate synthase, putative / 1-deoxyxylulose-5-phosphate synthase, putative / DXP-synthase, putative                          | 1-deoxy-D-xylulose 5-phosphate synthase, putative / 1-deoxyxylulose-5-phosphate synthase, putative / DXP-synthase, putative (DEF) (CLA1)                                                     | 4               | Uncertain   |
| At4g15430 | At3g21620 | early-responsive to dehydration protein-related / ERD protein-related                                                                                | early-responsive to dehydration protein-related / ERD protein-related                                                                                                                        | 6               | Uncertain   |
| At4g15430 | At3g21620 | early-responsive to dehydration protein-related / ERD protein-related                                                                                | early-responsive to dehydration protein-related / ERD protein-related                                                                                                                        | 9               | Uncertain   |
| At3g22780 | At4g14770 | CXC domain protein (TSO1)                                                                                                                            | tesmin/TSO1-like CXC domain-containing protein                                                                                                                                               | 2               | Uncertain   |
| At4g14640 | At3g22930 | calmodulin-8 (CAM8)                                                                                                                                  | calmodulin, putative                                                                                                                                                                         | 1               | Gained_in_A |
| At4g14500 | At3g23080 | expressed protein                                                                                                                                    | expressed protein                                                                                                                                                                            | 6               | Uncertain   |
| At4g13480 | At3g24310 | myb family transcription factor (MYB79)                                                                                                              | myb family transcription factor                                                                                                                                                              | 1               | Gained_in_A |
| At4g13190 | At3g24790 | protein kinase family protein                                                                                                                        | protein kinase family protein                                                                                                                                                                | 1               | Uncertain   |
| At3g24790 | At4g13190 | protein kinase family protein                                                                                                                        | protein kinase family protein                                                                                                                                                                | 2               | Uncertain   |
| At3g25110 | At4g13050 | acyl-[acyl carrier protein] thioesterase / acyl-ACP thioesterase / oleoyl-[acyl-carrier protein] hydrolase / S-acyl fatty acid synthase thioesterase | acyl-[acyl carrier protein] thioesterase, putative / acyl-ACP thioesterase, putative / oleoyl-[acyl-carrier protein] hydrolase, putative / S-acyl fatty acid synthase thioesterase, putative | 5               | Uncertain   |
| At3g25250 | At4g13000 | protein kinase family protein                                                                                                                        | protein kinase family protein                                                                                                                                                                | 1               | Uncertain   |
| At3g25420 | At4g12910 | serine carboxypeptidase S10 family protein                                                                                                           | serine carboxypeptidase S10 family protein                                                                                                                                                   | 2               | Uncertain   |
| At4g12910 | At3g25420 | serine carboxypeptidase S10 family protein                                                                                                           | serine carboxypeptidase S10 family protein                                                                                                                                                   | 9               | Uncertain   |
| At5g20830 | At3g43190 | sucrose synthase (UDP-glucose-fructose glucosyltransferase/sucrose-UDP glucosyltransferase/SUS1)                                                     | sucrose synthase, putative / sucrose-UDP glucosyltransferase, putative                                                                                                                       | 2               | Uncertain   |
| At1g09210 | At1g56340 | calreticulin 2 (CRT2)                                                                                                                                | calreticulin 1 (CRT1)                                                                                                                                                                        | 4               | Uncertain   |
| At1g09550 | At1g57590 | pectinacetylesterase, putative                                                                                                                       | pectinacetylesterase, putative                                                                                                                                                               | 5               | Uncertain   |
| At1g57700 | At1g09600 | protein kinase family protein                                                                                                                        | protein kinase family protein                                                                                                                                                                | 3               | Uncertain   |
| At1g10540 | At1g60030 | xanthine/uracil permease family protein                                                                                                              | xanthine/uracil permease family protein                                                                                                                                                      | 11              | Lost_in_B   |
| At1g60590 | At1g10640 | polygalacturonase, putative / pectinase, putative                                                                                                    | polygalacturonase, putative / pectinase, putative                                                                                                                                            | 6               | Lost_in_B   |
| At1g60810 | At1g10670 | ATP citrate-lyase -related                                                                                                                           | expressed protein                                                                                                                                                                            | 11              | Uncertain   |
| At1g10820 | At1g60670 | expressed protein                                                                                                                                    | expressed protein                                                                                                                                                                            | 1               | Uncertain   |
| At1g11070 | At1g61080 | hydroxyproline-rich glycoprotein family protein                                                                                                      | proline-rich family protein                                                                                                                                                                  | 5               | Uncertain   |
| At1g61080 | At1g11070 | proline-rich family protein                                                                                                                          | hydroxyproline-rich glycoprotein family protein                                                                                                                                              | 7               | Uncertain   |
| At1g61740 | At1g11540 | expressed protein                                                                                                                                    | expressed protein                                                                                                                                                                            | 2               | Uncertain   |
| At1g11740 | At1g62050 | ankyrin repeat family protein                                                                                                                        | ankyrin repeat protein-related                                                                                                                                                               | 2               | Uncertain   |
| At1g11910 | At1g62290 | aspartyl protease family protein                                                                                                                     | aspartyl protease family protein                                                                                                                                                             | 3               | Uncertain   |
| At1g11950 | At1g62310 | transcription factor jumonji (jmiC) domain-containing protein                                                                                        | transcription factor jumonji (jmiC) domain-containing protein                                                                                                                                | 1               | Uncertain   |
| At1g11950 | At1g62310 | transcription factor jumonji (jmiC) domain-containing protein                                                                                        | transcription factor jumonji (jmiC) domain-containing protein                                                                                                                                | 6               | Uncertain   |
| At1g11950 | At1g62310 | transcription factor jumonji (jmiC) domain-containing protein                                                                                        | transcription factor jumonji (jmiC) domain-containing protein                                                                                                                                | 8               | Uncertain   |
| At1g62440 | At1g12040 | leucine-rich repeat family protein / extensin family protein                                                                                         | leucine-rich repeat family protein / extensin family protein (LRX1)                                                                                                                          | 2               | Uncertain   |
| At1g63180 | At1g12780 | UDP-glucose 4-epimerase, putative / UDP-galactose 4-epimerase, putative / Galactowaldenase, putative                                                 | UDP-glucose 4-epimerase / UDP-galactose 4-epimerase / Galactowaldenase                                                                                                                       | 5               | Uncertain   |
| At2g14690 | At4g33840 | glycosyl hydrolase family 10 protein                                                                                                                 | glycosyl hydrolase family 10 protein                                                                                                                                                         | 5               | Uncertain   |
| At2g15300 | At4g34220 | leucine-rich repeat transmembrane protein kinase, putative                                                                                           | leucine-rich repeat transmembrane protein kinase, putative                                                                                                                                   | 2               | Uncertain   |
| At2g16090 | At4g34370 | zinc finger protein-related                                                                                                                          | IBR domain-containing protein                                                                                                                                                                | 5               | Uncertain   |
| At4g34480 | At2g16230 | glycosyl hydrolase family 17 protein                                                                                                                 | glycosyl hydrolase family 17 protein                                                                                                                                                         | 1               | Uncertain   |
| At4g34570 | At2g16370 | bifunctional dihydrofolate reductase-thymidylate synthase 2 / DHFR-TS (THY-2)                                                                        | bifunctional dihydrofolate reductase-thymidylate synthase 1 / DHFR-TS (THY-1)                                                                                                                | 10              | Uncertain   |

|           |           |                                                                                                        |                                                                                                        |               |
|-----------|-----------|--------------------------------------------------------------------------------------------------------|--------------------------------------------------------------------------------------------------------|---------------|
| At2g16370 | At4g34570 | bifunctional dihydrofolate reductase-thymidylate synthase 1 / DHFR-TS (THY-1)                          | bifunctional dihydrofolate reductase-thymidylate synthase 2 / DHFR-TS (THY-2)                          | 9 Uncertain   |
| At2g16730 | At4g35010 | glycosyl hydrolase family 35 protein                                                                   | glycosyl hydrolase family 35 protein                                                                   | 9 Uncertain   |
| At2g16750 | At4g35030 | protein kinase family protein                                                                          | protein kinase family protein                                                                          | 11 Uncertain  |
| At4g35270 | At2g17150 | RWP-RK domain-containing protein                                                                       | RWP-RK domain-containing protein                                                                       | 3 Uncertain   |
| At4g35290 | At2g17260 | glutamate receptor family protein (GLR3.2) (GLUR2)                                                     | glutamate receptor family protein (GLR3.1) (GLR2)                                                      | 3 Lost_in_B   |
| At2g17380 | At4g35410 | clathrin assembly protein AP19                                                                         | clathrin adaptor complex small chain family protein                                                    | 3 Gained_in_A |
| At2g17700 | At4g35780 | protein kinase family protein                                                                          | protein kinase family protein                                                                          | 3 Uncertain   |
| At4g36100 | At2g17990 | expressed protein                                                                                      | expressed protein                                                                                      | 1 Uncertain   |
| At4g36490 | At2g18180 | SEC14 cytosolic factor, putative / phosphoglyceride transfer protein, putative                         | SEC14 cytosolic factor, putative / phosphoglyceride transfer protein, putative                         | 10 Uncertain  |
| At2g18180 | At4g36490 | SEC14 cytosolic factor, putative / phosphoglyceride transfer protein, putative                         | SEC14 cytosolic factor, putative / phosphoglyceride transfer protein, putative                         | 3 Uncertain   |
| At2g18300 | At4g36540 | basic helix-loop-helix (bHLH) family protein                                                           | basic helix-loop-helix (bHLH) family protein                                                           | 3 Uncertain   |
| At2g18360 | At4g36610 | hydrolase, alpha/beta fold family protein                                                              | hydrolase, alpha/beta fold family protein                                                              | 1 Uncertain   |
| At4g36700 | At2g18540 | cupin family protein                                                                                   | cupin family protein                                                                                   | 2 Uncertain   |
| At2g18540 | At4g36700 | cupin family protein                                                                                   | cupin family protein                                                                                   | 4 Uncertain   |
| At5g07170 | At5g62240 | hypothetical protein                                                                                   | hypothetical protein                                                                                   | 17 Uncertain  |
| At5g07170 | At5g62240 | hypothetical protein                                                                                   | hypothetical protein                                                                                   | 8 Uncertain   |
| At5g07350 | At5g61780 | expressed protein                                                                                      | 100 kDa coactivator - like protein                                                                     | 10 Uncertain  |
| At5g07880 | At5g61210 | SNAP25 - like protein                                                                                  | syntaxin SNAP33                                                                                        | 4 Uncertain   |
| At5g61000 | At5g08020 | replication protein, putative                                                                          | replication protein, putative                                                                          | 7 Gained_in_A |
| At2g22660 | At4g37900 | glycine-rich protein                                                                                   | glycine-rich protein                                                                                   | 4 Uncertain   |
| At2g22660 | At4g37900 | glycine-rich protein                                                                                   | glycine-rich protein                                                                                   | 5 Uncertain   |
| At2g22660 | At4g37900 | glycine-rich protein                                                                                   | glycine-rich protein                                                                                   | 6 Uncertain   |
| At4g37890 | At2g22680 | zinc finger (C3HC4-type RING finger) family protein                                                    | zinc finger (C3HC4-type RING finger) family protein                                                    | 1 Uncertain   |
| At4g37760 | At2g22830 | squalene monooxygenase, putative / squalene epoxidase, putative                                        | squalene monooxygenase, putative / squalene epoxidase, putative                                        | 4 Lost_in_B   |
| At2g22830 | At4g37760 | squalene monooxygenase, putative / squalene epoxidase, putative                                        | squalene monooxygenase, putative / squalene epoxidase, putative                                        | 5 Uncertain   |
| At2g22840 | At4g37740 | expressed protein                                                                                      | expressed protein                                                                                      | 3 Uncertain   |
| At4g37740 | At2g22840 | expressed protein                                                                                      | expressed protein                                                                                      | 4 Uncertain   |
| At4g36820 | At2g23790 | hypothetical protein                                                                                   | expressed protein                                                                                      | 1 Uncertain   |
| At2g18730 | At4g30340 | diacylglycerol kinase, putative                                                                        | diacylglycerol kinase family protein                                                                   | 3 Uncertain   |
| At2g18730 | At4g30340 | diacylglycerol kinase, putative                                                                        | diacylglycerol kinase family protein                                                                   | 4 Uncertain   |
| At2g18730 | At4g30340 | diacylglycerol kinase, putative                                                                        | diacylglycerol kinase family protein                                                                   | 5 Uncertain   |
| At2g18960 | At4g30190 | ATPase 1, plasma membrane-type, putative / proton pump 1, putative / proton-exporting ATPase, putative | ATPase 2, plasma membrane-type, putative / proton pump 2, putative / proton-exporting ATPase, putative | 14 Uncertain  |
| At2g19690 | At4g29460 | phospholipase A2 beta, secretory low molecular weight                                                  | phospholipase A2 gamma, secretory low molecular weight                                                 | 1 Uncertain   |
| At4g29460 | At2g19690 | phospholipase A2 gamma, secretory low molecular weight                                                 | phospholipase A2 beta, secretory low molecular weight                                                  | 4 Uncertain   |
| At2g19860 | At4g29130 | hexokinase 2 (HXK2)                                                                                    | hexokinase 1 (HXK1)                                                                                    | 5 Uncertain   |
| At2g19860 | At4g29130 | hexokinase 2 (HXK2)                                                                                    | hexokinase 1 (HXK1)                                                                                    | 8 Uncertain   |
| At2g20580 | At4g28470 | 26S proteasome regulatory subunit S2 (RPN1)                                                            | 26S proteasome regulatory subunit, putative                                                            | 22 Uncertain  |
| At2g20580 | At4g28470 | 26S proteasome regulatory subunit S2 (RPN1)                                                            | 26S proteasome regulatory subunit, putative                                                            | 25 Uncertain  |
| At2g20590 | At4g28430 | reticulon family protein                                                                               | reticulon family protein                                                                               | 8 Uncertain   |
| At2g20610 | At4g28420 | aminotransferase, putative                                                                             | aminotransferase, putative                                                                             | 4 Uncertain   |
| At4g28370 | At2g20650 | zinc finger (C3HC4-type RING finger) family protein                                                    | zinc finger (C3HC4-type RING finger) family protein                                                    | 16 Uncertain  |
| At4g28220 | At2g20800 | NADH dehydrogenase-related                                                                             | pyridine nucleotide-disulphide oxidoreductase family protein                                           | 2 Uncertain   |
| At4g28220 | At2g20800 | NADH dehydrogenase-related                                                                             | pyridine nucleotide-disulphide oxidoreductase family protein                                           | 3 Uncertain   |
| At2g20800 | At4g28220 | pyridine nucleotide-disulphide oxidoreductase family protein                                           | NADH dehydrogenase-related                                                                             | 5 Lost_in_B   |
| At4g28220 | At2g20800 | NADH dehydrogenase-related                                                                             | pyridine nucleotide-disulphide oxidoreductase family protein                                           | 8 Uncertain   |
| At4g28220 | At2g20800 | NADH dehydrogenase-related                                                                             | pyridine nucleotide-disulphide oxidoreductase family protein                                           | 9 Uncertain   |
| At4g28190 | At2g20825 | expressed protein                                                                                      | expressed protein                                                                                      | 2 Uncertain   |
| At5g25050 | At5g10820 | membrane protein -related                                                                              | hypothetical protein                                                                                   | 1 Uncertain   |
| At5g26150 | At5g12000 | protein kinase family                                                                                  | protein kinase family                                                                                  | 6 Uncertain   |
| At5g26660 | At5g12870 | myb transcription factor (ATMYB4)                                                                      | myb family transcription factor                                                                        | 1 Gained_in_A |

|           |           |                                                                                                                                   |                                                                                                                                   |    |             |
|-----------|-----------|-----------------------------------------------------------------------------------------------------------------------------------|-----------------------------------------------------------------------------------------------------------------------------------|----|-------------|
| At2g23980 | At4g30560 | cyclic nucleotide-regulated ion channel / cyclic nucleotide-gated channel (CNGC6)                                                 | cyclic nucleotide-regulated ion channel, putative                                                                                 | 5  | Lost_in_B   |
| At4g30610 | At2g24000 | serine carboxypeptidase S10 family protein                                                                                        | serine carboxypeptidase S10 family protein                                                                                        | 9  | Uncertain   |
| At4g30710 | At2g24070 | expressed protein                                                                                                                 | expressed protein                                                                                                                 | 4  | Uncertain   |
| At2g24330 | At4g31090 | expressed protein                                                                                                                 | expressed protein                                                                                                                 | 3  | Uncertain   |
| At4g31340 | At2g24420 | myosin heavy chain-related                                                                                                        | DNA repair ATPase-related                                                                                                         | 6  | Uncertain   |
| At4g31710 | At2g24720 | glutamate receptor family protein (GLR2.4)                                                                                        | glutamate receptor family protein (GLR2.2)                                                                                        | 3  | Uncertain   |
| At4g31710 | At2g24720 | glutamate receptor family protein (GLR2.4)                                                                                        | glutamate receptor family protein (GLR2.2)                                                                                        | 6  | Uncertain   |
| At4g31860 | At2g25070 | protein phosphatase 2C, putative / PP2C, putative                                                                                 | protein phosphatase 2C, putative / PP2C, putative                                                                                 | 5  | Lost_in_B   |
| At2g25590 | At4g32440 | agenet domain-containing protein                                                                                                  | agenet domain-containing protein                                                                                                  | 2  | Uncertain   |
| At2g25590 | At4g32440 | agenet domain-containing protein                                                                                                  | agenet domain-containing protein                                                                                                  | 3  | Uncertain   |
| At2g25850 | At4g32850 | nucleotidyltransferase family protein                                                                                             | nucleotidyltransferase family protein                                                                                             | 12 | Uncertain   |
| At4g32850 | At2g25850 | nucleotidyltransferase family protein                                                                                             | nucleotidyltransferase family protein                                                                                             | 13 | Uncertain   |
| At4g32940 | At2g25940 | vacuolar processing enzyme gamma / gamma-VPE                                                                                      | vacuolar processing enzyme alpha / alpha-VPE                                                                                      | 5  | Uncertain   |
| At2g26060 | At4g32990 | transducin family protein / WD-40 repeat family protein                                                                           | transducin family protein / WD-40 repeat family protein                                                                           | 9  | Uncertain   |
| At2g26080 | At4g33010 | glycine dehydrogenase [decarboxylating], putative / glycine decarboxylase, putative / glycine cleavage system P-protein, putative | glycine dehydrogenase [decarboxylating], putative / glycine decarboxylase, putative / glycine cleavage system P-protein, putative | 7  | Uncertain   |
| At4g33230 | At2g26440 | pectinesterase family protein                                                                                                     | pectinesterase family protein                                                                                                     | 1  | Gained_in_A |
| At1g25460 | At1g68540 | oxidoreductase family protein                                                                                                     | oxidoreductase family protein                                                                                                     | 2  | Uncertain   |
| At1g25460 | At1g68540 | oxidoreductase family protein                                                                                                     | oxidoreductase family protein                                                                                                     | 4  | Uncertain   |
| At1g68670 | At1g25550 | myb family transcription factor                                                                                                   | myb family transcription factor                                                                                                   | 2  | Uncertain   |
| At1g26260 | At1g68920 | basic helix-loop-helix (bHLH) family protein                                                                                      | basic helix-loop-helix (bHLH) family protein                                                                                      | 2  | Uncertain   |
| At1g26630 | At1g69410 | eukaryotic translation initiation factor 5A, putative / eIF-5A, putative                                                          | eukaryotic translation initiation factor 5A, putative / eIF-5A, putative                                                          | 4  | Gained_in_A |
| At1g27040 | At1g69870 | nitrate transporter, putative                                                                                                     | proton-dependent oligopeptide transport (POT) family protein                                                                      | 4  | Uncertain   |
| At1g69870 | At1g27040 | proton-dependent oligopeptide transport (POT) family protein                                                                      | nitrate transporter, putative                                                                                                     | 5  | Uncertain   |
| At5g40820 | At3g27230 | FAT domain-containing phosphatidylinositol 3- and 4-kinase family                                                                 | expressed protein                                                                                                                 | 12 | Uncertain   |
| At5g40720 | At3g27330 | expressed protein                                                                                                                 | zinc finger (C3HC4-type RING finger) family protein                                                                               | 1  | Uncertain   |
| At3g27330 | At5g40720 | zinc finger (C3HC4-type RING finger) family protein                                                                               | expressed protein                                                                                                                 | 4  | Uncertain   |
| At5g40640 | At3g27390 | expressed protein                                                                                                                 | expressed protein                                                                                                                 | 3  | Uncertain   |
| At5g40640 | At3g27390 | expressed protein                                                                                                                 | expressed protein                                                                                                                 | 5  | Lost_in_B   |
| At5g40640 | At3g27390 | expressed protein                                                                                                                 | expressed protein                                                                                                                 | 6  | Uncertain   |
| At5g39510 | At3g29100 | v-SNARE AtVTI1a (ZIG)                                                                                                             | vesicle transport v-SNARE 13 (VTI13) / vesicle soluble NSF attachment protein receptor 13                                         | 4  | Uncertain   |
| At5g39430 | At3g29180 | hypothetical protein                                                                                                              | expressed protein                                                                                                                 | 3  | Uncertain   |
| At3g06650 | At5g49460 | ATP-citrate synthase, putative / ATP-citrate (pro-S-)-lyase, putative / citrate cleavage enzyme, putative                         | ATP citrate lyase                                                                                                                 | 15 | Uncertain   |
| At5g41140 | At1g63300 | expressed protein                                                                                                                 | expressed protein                                                                                                                 | 8  | Uncertain   |
| At1g63830 | At5g41390 | proline-rich family protein                                                                                                       | hypothetical protein                                                                                                              | 7  | Uncertain   |
| At5g41710 | At1g64260 | hypothetical protein                                                                                                              | zinc finger protein-related                                                                                                       | 2  | Uncertain   |
| At1g64520 | At5g42040 | 26S proteasome regulatory subunit, putative (RPN12)                                                                               | hypothetical protein                                                                                                              | 5  | Uncertain   |
| At1g64610 | At5g42010 | WD-40 repeat family protein                                                                                                       | expressed protein                                                                                                                 | 3  | Uncertain   |
| At5g08610 | At5g63630 | DEAD box RNA helicase, putative                                                                                                   | DEAD box RNA helicase, putative                                                                                                   | 6  | Uncertain   |
| At5g09290 | At5g63980 | 3'(2'),5'-bisphosphate nucleotidase-related protein                                                                               | 3(2),5-bisphosphate nucleotidase                                                                                                  | 5  | Uncertain   |
| At5g09730 | At5g64570 | glycosyl hydrolase family 3                                                                                                       | glycosyl hydrolase family 3                                                                                                       | 4  | Gained_in_A |
| At5g64710 | At5g09840 | expressed protein                                                                                                                 | expressed protein                                                                                                                 | 1  | Uncertain   |
| At5g64740 | At5g09870 | cellulose synthase, catalytic subunit, putative                                                                                   | cellulose synthase, catalytic subunit, putative                                                                                   | 6  | Uncertain   |
| At5g09910 | At5g64810 | hypothetical protein                                                                                                              | WRKY family transcription factor                                                                                                  | 8  | Uncertain   |
| At5g09930 | At5g64840 | ABC transporter family protein                                                                                                    | ABC transporter family protein                                                                                                    | 5  | Uncertain   |
| At5g10100 | At5g65140 | trehalose-6-phosphate phosphatase, putative                                                                                       | trehalose-6-phosphate phosphatase, putative                                                                                       | 10 | Uncertain   |
| At5g65020 | At5g10220 | annexin                                                                                                                           | annexin -related protein                                                                                                          | 4  | Uncertain   |
| At5g10240 | At5g65010 | asparagine synthetase ASN3                                                                                                        | asparagine synthetase (gb AAC72837.1)                                                                                             | 10 | Uncertain   |

|           |           |                                                                                                   |                                                                                                   |                |
|-----------|-----------|---------------------------------------------------------------------------------------------------|---------------------------------------------------------------------------------------------------|----------------|
| At5g65240 | At5g10290 | receptor-related protein kinase                                                                   | protein serine/threonine kinase-related protein                                                   | 9 Uncertain    |
| At2g03640 | At1g13730 | nuclear transport factor 2 (NTF2) family protein / RNA recognition motif (RRM)-containing protein | nuclear transport factor 2 (NTF2) family protein / RNA recognition motif (RRM)-containing protein | 2 Uncertain    |
| At1g14040 | At2g03260 | EXS family protein / ERD1/XPR1/SYG1 family protein                                                | EXS family protein / ERD1/XPR1/SYG1 family protein                                                | 3 Uncertain    |
| At1g14260 | At2g02960 | zinc finger (C3HC4-type RING finger) family protein                                               | zinc finger (C3HC4-type RING finger) family protein                                               | 5 Uncertain    |
| At2g02780 | At1g14390 | leucine-rich repeat transmembrane protein kinase, putative                                        | leucine-rich repeat transmembrane protein kinase, putative                                        | 6 Uncertain    |
| At2g02780 | At1g14390 | leucine-rich repeat transmembrane protein kinase, putative                                        | leucine-rich repeat transmembrane protein kinase, putative                                        | 7 Uncertain    |
| At2g02720 | At1g14420 | pectate lyase family protein                                                                      | pectate lyase family protein                                                                      | 3 Gained_in_A  |
| At1g14660 | At2g01980 | sodium proton exchanger, putative (NHX8)                                                          | sodium proton exchanger, putative (NHX7) (SOS1)                                                   | 10 Uncertain   |
| At2g01980 | At1g14660 | sodium proton exchanger, putative (NHX7) (SOS1)                                                   | sodium proton exchanger, putative (NHX8)                                                          | 9 Uncertain    |
| At2g01670 | At1g14860 | MutT/nudix family protein                                                                         | MutT/nudix family protein                                                                         | 4 Uncertain    |
| At1g15080 | At2g01180 | phosphatidic acid phosphatase family protein / PAP2 family protein                                | phosphatidic acid phosphatase family protein / PAP2 family protein                                | 2 Lost_in_B    |
| At1g15080 | At2g01180 | phosphatidic acid phosphatase family protein / PAP2 family protein                                | phosphatidic acid phosphatase family protein / PAP2 family protein                                | 3 Uncertain    |
| At1g15080 | At2g01180 | phosphatidic acid phosphatase family protein / PAP2 family protein                                | phosphatidic acid phosphatase family protein / PAP2 family protein                                | 4 Uncertain    |
| At1g15080 | At2g01180 | phosphatidic acid phosphatase family protein / PAP2 family protein                                | phosphatidic acid phosphatase family protein / PAP2 family protein                                | 5 Lost_in_B    |
| At1g15080 | At2g01180 | phosphatidic acid phosphatase family protein / PAP2 family protein                                | phosphatidic acid phosphatase family protein / PAP2 family protein                                | 6 Gained_in_A  |
| At1g15080 | At2g01180 | phosphatidic acid phosphatase family protein / PAP2 family protein                                | phosphatidic acid phosphatase family protein / PAP2 family protein                                | 7 Uncertain    |
| At1g80090 | At1g15330 | CBS domain-containing protein                                                                     | CBS domain-containing protein                                                                     | 2 Uncertain    |
| At1g80090 | At1g15330 | CBS domain-containing protein                                                                     | CBS domain-containing protein                                                                     | 3 Gained_in_A  |
| At1g15490 | At1g80280 | hydrolase, alpha/beta fold family protein                                                         | hydrolase, alpha/beta fold family protein                                                         | 4 Uncertain    |
| At1g15490 | At1g80280 | hydrolase, alpha/beta fold family protein                                                         | hydrolase, alpha/beta fold family protein                                                         | 5 Uncertain    |
| At1g15570 | At1g80370 | cyclin, putative                                                                                  | cyclin, putative                                                                                  | 7 Uncertain    |
| At1g80370 | At1g15570 | cyclin, putative                                                                                  | cyclin, putative                                                                                  | 8 Uncertain    |
| At1g15730 | At1g80480 | PRLI-interacting factor L, putative                                                               | PRLI-interacting factor L, putative                                                               | 10 Uncertain   |
| At1g80490 | At1g15750 | WD-40 repeat family protein                                                                       | WD-40 repeat family protein                                                                       | 12 Uncertain   |
| At1g80490 | At1g15750 | WD-40 repeat family protein                                                                       | WD-40 repeat family protein                                                                       | 14 Uncertain   |
| At1g15750 | At1g80490 | WD-40 repeat family protein                                                                       | WD-40 repeat family protein                                                                       | 21 Uncertain   |
| At1g15750 | At1g80490 | WD-40 repeat family protein                                                                       | WD-40 repeat family protein                                                                       | 3 Uncertain    |
| At1g80490 | At1g15750 | WD-40 repeat family protein                                                                       | WD-40 repeat family protein                                                                       | 7 Uncertain    |
| At1g15950 | At1g80820 | cinnamoyl-CoA reductase, putative                                                                 | cinnamoyl-CoA reductase, putative                                                                 | 1 Lost_in_B    |
| At1g15960 | At1g80830 | NRAMP metal ion transporter 6, putative (NRAMP6)                                                  | NRAMP metal ion transporter 1 (NRAMP1)                                                            | 10 Lost_in_B   |
| At1g15960 | At1g80830 | NRAMP metal ion transporter 6, putative (NRAMP6)                                                  | NRAMP metal ion transporter 1 (NRAMP1)                                                            | 8 Uncertain    |
| At1g80910 | At1g16020 | expressed protein                                                                                 | expressed protein                                                                                 | 6 Uncertain    |
| At1g79030 | At1g16680 | DNAJ heat shock N-terminal domain-containing protein / S-locus protein, putative                  | DNAJ heat shock N-terminal domain-containing protein / S-locus protein, putative                  | 14 Uncertain   |
| At1g79000 | At1g16710 | p300/CBP acetyltransferase-related protein 2 (PCAT2)                                              | TAZ zinc finger family protein / zinc finger (ZZ type) family protein                             | 4 Uncertain    |
| At1g17040 | At1g78540 | transcription factor-related                                                                      | transcription factor-related                                                                      | 10 Uncertain   |
| At1g78540 | At1g17040 | transcription factor-related                                                                      | transcription factor-related                                                                      | 4 Uncertain    |
| At1g17420 | At1g72520 | lipoxygenase, putative                                                                            | lipoxygenase, putative                                                                            | 3 Uncertain    |
| At1g17420 | At1g72520 | lipoxygenase, putative                                                                            | lipoxygenase, putative                                                                            | 6 Gained_in_A  |
| At1g72700 | At1g17500 | haloacid dehalogenase-like hydrolase family protein                                               | haloacid dehalogenase-like hydrolase family protein                                               | 7 Uncertain    |
| At1g17500 | At1g72700 | haloacid dehalogenase-like hydrolase family protein                                               | haloacid dehalogenase-like hydrolase family protein                                               | 8 Uncertain    |
| At1g72760 | At1g17540 | protein kinase family protein                                                                     | protein kinase-related                                                                            | 10 Gained_in_A |
| At1g72760 | At1g17540 | protein kinase family protein                                                                     | protein kinase-related                                                                            | 6 Uncertain    |
| At1g73650 | At1g18170 | expressed protein                                                                                 | immunophilin / FKBP-type peptidyl-prolyl cis-trans isomerase family protein                       | 10 Uncertain   |
| At1g73650 | At1g18170 | expressed protein                                                                                 | immunophilin / FKBP-type peptidyl-prolyl cis-trans isomerase family protein                       | 9 Uncertain    |
| At1g73860 | At1g18410 | kinesin motor protein-related                                                                     | kinesin motor protein-related                                                                     | 10 Uncertain   |

|           |           |                                                                                                                                                         |                                                                                                                                                 |    |             |
|-----------|-----------|---------------------------------------------------------------------------------------------------------------------------------------------------------|-------------------------------------------------------------------------------------------------------------------------------------------------|----|-------------|
| At1g18410 | At1g73860 | kinesin motor protein-related                                                                                                                           | kinesin motor protein-related                                                                                                                   | 22 | Uncertain   |
| At1g73860 | At1g18410 | kinesin motor protein-related                                                                                                                           | kinesin motor protein-related                                                                                                                   | 23 | Uncertain   |
| At1g74160 | At1g18620 | expressed protein                                                                                                                                       | expressed protein                                                                                                                               | 2  | Uncertain   |
| At1g74480 | At1g18790 | RWP-RK domain-containing protein                                                                                                                        | RWP-RK domain-containing protein                                                                                                                | 2  | Uncertain   |
| At1g18870 | At1g74710 | isochorismate synthase, putative / isochorismate mutase, putative                                                                                       | isochorismate synthase 1 (ICS1) / isochorismate mutase                                                                                          | 14 | Uncertain   |
| At1g18870 | At1g74710 | isochorismate synthase, putative / isochorismate mutase, putative                                                                                       | isochorismate synthase 1 (ICS1) / isochorismate mutase                                                                                          | 3  | Uncertain   |
| At1g18870 | At1g74710 | isochorismate synthase, putative / isochorismate mutase, putative                                                                                       | isochorismate synthase 1 (ICS1) / isochorismate mutase                                                                                          | 5  | Uncertain   |
| At1g74950 | At1g19180 | expressed protein                                                                                                                                       | expressed protein                                                                                                                               | 3  | Uncertain   |
| At1g74950 | At1g19180 | expressed protein                                                                                                                                       | expressed protein                                                                                                                               | 4  | Uncertain   |
| At1g74950 | At1g19180 | expressed protein                                                                                                                                       | expressed protein                                                                                                                               | 5  | Uncertain   |
| At1g75050 | At1g19320 | thaumatin-like protein, putative / pathogenesis-related protein, putative                                                                               | pathogenesis-related thaumatin family protein                                                                                                   | 1  | Gained_in_A |
| At1g19320 | At1g75050 | pathogenesis-related thaumatin family protein                                                                                                           | thaumatin-like protein, putative / pathogenesis-related protein, putative                                                                       | 2  | Uncertain   |
| At1g19330 | At1g75060 | expressed protein                                                                                                                                       | expressed protein                                                                                                                               | 2  | Uncertain   |
| At1g19450 | At1g75220 | integral membrane protein, putative / sugar transporter family protein                                                                                  | integral membrane protein, putative                                                                                                             | 12 | Uncertain   |
| At1g75220 | At1g19450 | integral membrane protein, putative                                                                                                                     | integral membrane protein, putative / sugar transporter family protein                                                                          | 17 | Uncertain   |
| At1g20200 | At1g75990 | 26S proteasome regulatory subunit S3, putative (RPN3)                                                                                                   | 26S proteasome regulatory subunit S3, putative (RPN3)                                                                                           | 5  | Uncertain   |
| At1g20220 | At1g76010 | expressed protein                                                                                                                                       | expressed protein                                                                                                                               | 7  | Uncertain   |
| At1g20260 | At1g76030 | vacuolar ATP synthase subunit B, putative / V-ATPase B subunit, putative / vacuolar proton pump B subunit, putative / V-ATPase 57 kDa subunit, putative | vacuolar ATP synthase subunit B / V-ATPase B subunit / vacuolar proton pump B subunit / V-ATPase 57 kDa subunit                                 | 13 | Uncertain   |
| At1g20260 | At1g76030 | vacuolar ATP synthase subunit B, putative / V-ATPase B subunit, putative / vacuolar proton pump B subunit, putative / V-ATPase 57 kDa subunit, putative | vacuolar ATP synthase subunit B / V-ATPase B subunit / vacuolar proton pump B subunit / V-ATPase 57 kDa subunit                                 | 14 | Uncertain   |
| At1g76140 | At1g20380 | prolyl oligopeptidase, putative / prolyl endopeptidase, putative / post-proline cleaving enzyme, putative                                               | prolyl oligopeptidase, putative / prolyl endopeptidase, putative / post-proline cleaving enzyme, putative                                       | 8  | Uncertain   |
| At1g20650 | At1g76360 | protein kinase family protein                                                                                                                           | protein kinase, putative                                                                                                                        | 10 | Gained_in_A |
| At1g20650 | At1g76360 | protein kinase family protein                                                                                                                           | protein kinase, putative                                                                                                                        | 2  | Uncertain   |
| At1g76360 | At1g20650 | protein kinase, putative                                                                                                                                | protein kinase family protein                                                                                                                   | 5  | Lost_in_B   |
| At1g76360 | At1g20650 | protein kinase, putative                                                                                                                                | protein kinase family protein                                                                                                                   | 8  | Gained_in_A |
| At1g76360 | At1g20650 | protein kinase, putative                                                                                                                                | protein kinase family protein                                                                                                                   | 9  | Gained_in_A |
| At1g20950 | At1g76550 | pyrophosphate--fructose-6-phosphate 1-phosphotransferase-related / pyrophosphate-dependent 6-phosphofructose-1-kinase-related                           | pyrophosphate--fructose-6-phosphate 1-phosphotransferase alpha subunit, putative / pyrophosphate-dependent 6-phosphofructose-1-kinase, putative | 18 | Uncertain   |
| At1g21440 | At1g77060 | mutase family protein                                                                                                                                   | mutase family protein                                                                                                                           | 5  | Uncertain   |
| At1g77510 | At1g21750 | protein disulfide isomerase, putative                                                                                                                   | protein disulfide isomerase, putative                                                                                                           | 7  | Uncertain   |
| At1g22070 | At1g77920 | bZIP family transcription factor (TGA3)                                                                                                                 | bZIP family transcription factor                                                                                                                | 6  | Uncertain   |
| At1g77980 | At1g22130 | MADS-box family protein                                                                                                                                 | MADS-box family protein                                                                                                                         | 8  | Uncertain   |
| At1g22130 | At1g77980 | MADS-box family protein                                                                                                                                 | MADS-box family protein                                                                                                                         | 9  | Uncertain   |
| At1g78050 | At1g22170 | phosphoglycerate/bisphosphoglycerate mutase family protein                                                                                              | phosphoglycerate/bisphosphoglycerate mutase family protein                                                                                      | 2  | Uncertain   |
| At1g22710 | At1g71880 | sucrose transporter / sucrose-proton symporter (SUC2)                                                                                                   | sucrose transporter / sucrose-proton symporter (SUC1)                                                                                           | 3  | Uncertain   |
| At1g22990 | At1g71050 | heavy-metal-associated domain-containing protein / copper chaperone (CCH)-related                                                                       | heavy-metal-associated domain-containing protein / copper chaperone (CCH)-related                                                               | 1  | Uncertain   |
| At1g71020 | At1g23030 | armadillo/beta-catenin repeat family protein / U-box domain-containing protein                                                                          | armadillo/beta-catenin repeat family protein / U-box domain-containing protein                                                                  | 2  | Uncertain   |
| At1g23110 | At1g70900 | hypothetical protein                                                                                                                                    | expressed protein                                                                                                                               | 1  | Uncertain   |
| At1g70900 | At1g23110 | expressed protein                                                                                                                                       | hypothetical protein                                                                                                                            | 7  | Uncertain   |
| At1g23170 | At1g70770 | expressed protein                                                                                                                                       | expressed protein                                                                                                                               | 8  | Lost_in_B   |
| At1g70710 | At1g23210 | endo-1,4-beta-glucanase (EGASE) / cellulase                                                                                                             | glycosyl hydrolase family 9 protein                                                                                                             | 1  | Uncertain   |
| At1g70710 | At1g23210 | endo-1,4-beta-glucanase (EGASE) / cellulase                                                                                                             | glycosyl hydrolase family 9 protein                                                                                                             | 4  | Uncertain   |

|           |           |                                                                                                           |                                                                                                           |    |             |
|-----------|-----------|-----------------------------------------------------------------------------------------------------------|-----------------------------------------------------------------------------------------------------------|----|-------------|
| At1g70710 | At1g23210 | endo-1,4-beta-glucanase (EGASE) / cellulase                                                               | glycosyl hydrolase family 9 protein                                                                       | 5  | Uncertain   |
| At1g23310 | At1g70580 | glutamate:glyoxylate aminotransferase 1 (GGT1)                                                            | glutamate:glyoxylate aminotransferase 2 (GGT2)                                                            | 11 | Gained_in_A |
| At1g23340 | At1g70550 | expressed protein                                                                                         | expressed protein                                                                                         | 4  | Uncertain   |
| At1g70430 | At1g23700 | protein kinase family protein                                                                             | protein kinase family protein                                                                             | 18 | Uncertain   |
| At1g23820 | At1g70310 | spermidine synthase 1 (SPDSYN1) / putrescine aminopropyltransferase 1                                     | spermidine synthase 2 (SPDSYN2) / putrescine aminopropyltransferase 2                                     | 6  | Uncertain   |
| At1g24190 | At1g70060 | paired amphipathic helix repeat-containing protein                                                        | paired amphipathic helix repeat-containing protein                                                        | 15 | Uncertain   |
| At4g38550 | At2g20960 | expressed protein                                                                                         | expressed protein                                                                                         | 5  | Uncertain   |
| At4g38550 | At2g20960 | expressed protein                                                                                         | expressed protein                                                                                         | 8  | Uncertain   |
| At2g20960 | At4g38550 | expressed protein                                                                                         | expressed protein                                                                                         | 9  | Uncertain   |
| At2g21100 | At4g38700 | disease resistance-responsive protein-related / dirigent protein-related                                  | disease resistance-responsive family protein                                                              | 1  | Gained_in_A |
| At2g21120 | At4g38730 | expressed protein                                                                                         | expressed protein                                                                                         | 8  | Uncertain   |
| At4g38970 | At2g21330 | fructose-bisphosphate aldolase, putative                                                                  | fructose-bisphosphate aldolase, putative                                                                  | 5  | Gained_in_A |
| At2g21340 | At4g39030 | enhanced disease susceptibility protein, putative / salicylic acid induction deficient protein, putative  | enhanced disease susceptibility 5 (EDS5) / salicylic acid induction deficient 1 (SID1)                    | 7  | Uncertain   |
| At2g21340 | At4g39030 | enhanced disease susceptibility protein, putative / salicylic acid induction deficient protein, putative  | enhanced disease susceptibility 5 (EDS5) / salicylic acid induction deficient 1 (SID1)                    | 9  | Uncertain   |
| At4g39170 | At2g21520 | SEC14 cytosolic factor, putative / phosphoglyceride transfer protein, putative                            | SEC14 cytosolic factor, putative / phosphoglyceride transfer protein, putative                            | 12 | Uncertain   |
| At4g39170 | At2g21520 | SEC14 cytosolic factor, putative / phosphoglyceride transfer protein, putative                            | SEC14 cytosolic factor, putative / phosphoglyceride transfer protein, putative                            | 13 | Uncertain   |
| At2g21520 | At4g39170 | SEC14 cytosolic factor, putative / phosphoglyceride transfer protein, putative                            | SEC14 cytosolic factor, putative / phosphoglyceride transfer protein, putative                            | 2  | Lost_in_B   |
| At2g21520 | At4g39170 | SEC14 cytosolic factor, putative / phosphoglyceride transfer protein, putative                            | SEC14 cytosolic factor, putative / phosphoglyceride transfer protein, putative                            | 3  | Uncertain   |
| At2g21520 | At4g39170 | SEC14 cytosolic factor, putative / phosphoglyceride transfer protein, putative                            | SEC14 cytosolic factor, putative / phosphoglyceride transfer protein, putative                            | 4  | Uncertain   |
| At2g21520 | At4g39170 | SEC14 cytosolic factor, putative / phosphoglyceride transfer protein, putative                            | SEC14 cytosolic factor, putative / phosphoglyceride transfer protein, putative                            | 8  | Uncertain   |
| At4g39170 | At2g21520 | SEC14 cytosolic factor, putative / phosphoglyceride transfer protein, putative                            | SEC14 cytosolic factor, putative / phosphoglyceride transfer protein, putative                            | 9  | Uncertain   |
| At4g39330 | At2g21730 | mannitol dehydrogenase, putative                                                                          | mannitol dehydrogenase, putative                                                                          | 3  | Lost_in_B   |
| At2g21770 | At4g39350 | cellulose synthase, catalytic subunit, putative                                                           | cellulose synthase, catalytic subunit (Ath-A)                                                             | 2  | Uncertain   |
| At4g39350 | At2g21770 | cellulose synthase, catalytic subunit (Ath-A)                                                             | cellulose synthase, catalytic subunit, putative                                                           | 6  | Uncertain   |
| At4g39800 | At2g22240 | inositol-3-phosphate synthase isozyme 1 / myo-inositol-1-phosphate synthase 1 / MI-1-P synthase 1 / IPS 1 | inositol-3-phosphate synthase isozyme 2 / myo-inositol-1-phosphate synthase 2 / MI-1-P synthase 2 / IPS 2 | 3  | Gained_in_A |
| At4g39800 | At2g22240 | inositol-3-phosphate synthase isozyme 1 / myo-inositol-1-phosphate synthase 1 / MI-1-P synthase 1 / IPS 1 | inositol-3-phosphate synthase isozyme 2 / myo-inositol-1-phosphate synthase 2 / MI-1-P synthase 2 / IPS 2 | 5  | Gained_in_A |
| At1g01010 | At4g01550 | no apical meristem (NAM) family protein                                                                   | no apical meristem (NAM) family protein                                                                   | 3  | Uncertain   |
| At4g01550 | At1g01010 | no apical meristem (NAM) family protein                                                                   | no apical meristem (NAM) family protein                                                                   | 4  | Uncertain   |
| At1g01010 | At4g01550 | no apical meristem (NAM) family protein                                                                   | no apical meristem (NAM) family protein                                                                   | 7  | Uncertain   |
| At1g01340 | At4g01010 | cyclic nucleotide-regulated ion channel (CNGC10) (ACBK1)                                                  | cyclic nucleotide-regulated ion channel, putative (CNGC13)                                                | 3  | Uncertain   |
| At4g01280 | At1g01520 | myb family transcription factor                                                                           | myb family transcription factor                                                                           | 3  | Uncertain   |
| At4g00710 | At1g01740 | protein kinase family protein                                                                             | protein kinase family protein                                                                             | 7  | Uncertain   |
| At4g01830 | At1g02520 | multidrug resistance P-glycoprotein, putative                                                             | multidrug resistance P-glycoprotein, putative                                                             | 6  | Uncertain   |
| At4g02200 | At1g02750 | drought-responsive family protein                                                                         | drought-responsive family protein                                                                         | 4  | Uncertain   |
| At1g02780 | At4g02230 | 60S ribosomal protein L19 (RPL19A)                                                                        | 60S ribosomal protein L19 (RPL19C)                                                                        | 3  | Gained_in_A |
| At1g02800 | At4g02290 | endo-1,4-beta-glucanase / cellulase (CEL2)                                                                | glycosyl hydrolase family 9 protein                                                                       | 2  | Gained_in_A |
| At4g02570 | At1g02980 | cullin family protein                                                                                     | cullin family protein                                                                                     | 10 | Uncertain   |
| At4g02570 | At1g02980 | cullin family protein                                                                                     | cullin family protein                                                                                     | 13 | Uncertain   |

|           |           |                                                                                                             |                                                                                                             |                |
|-----------|-----------|-------------------------------------------------------------------------------------------------------------|-------------------------------------------------------------------------------------------------------------|----------------|
| At4g02570 | At1g02980 | cullin family protein                                                                                       | cullin family protein                                                                                       | 3 Uncertain    |
| At4g02570 | At1g02980 | cullin family protein                                                                                       | cullin family protein                                                                                       | 5 Gained_in_A  |
| At4g02570 | At1g02980 | cullin family protein                                                                                       | cullin family protein                                                                                       | 8 Uncertain    |
| At1g03050 | At4g02650 | epsin N-terminal homology (ENTH) domain-containing protein / clathrin assembly protein-related              | epsin N-terminal homology (ENTH) domain-containing protein / clathrin assembly protein-related              | 1 Uncertain    |
| At4g02850 | At1g03210 | phenazine biosynthesis PhzC/PhzF family protein                                                             | phenazine biosynthesis PhzC/PhzF family protein                                                             | 1 Uncertain    |
| At5g42980 | At1g45145 | thioredoxin H-type 3 (TRX-H-3)                                                                              | thioredoxin H-type 5 (TRX-H-5) (TOUL)                                                                       | 2 Uncertain    |
| At5g43080 | At1g47210 | cyclin, putative                                                                                            | cyclin family protein                                                                                       | 4 Uncertain    |
| At3g47690 | At5g62500 | microtubule-associated EB1 family protein                                                                   | microtubule-associated protein EB1-related protein                                                          | 6 Uncertain    |
| At5g62670 | At3g47950 | ATPase, plasma membrane-type (proton pump), putative                                                        | ATPase, plasma membrane-type, putative / proton pump, putative                                              | 7 Uncertain    |
| At5g62670 | At3g47950 | ATPase, plasma membrane-type (proton pump), putative                                                        | ATPase, plasma membrane-type, putative / proton pump, putative                                              | 8 Uncertain    |
| At5g63190 | At3g48390 | MA3 domain-containing protein                                                                               | MA3 domain-containing protein                                                                               | 3 Uncertain    |
| At3g48730 | At5g63570 | glutamate-1-semialdehyde 2,1-aminomutase 2 (GSA 2) / glutamate-1-semialdehyde aminotransferase 2 (GSA-AT 2) | glutamate-1-semialdehyde 2,1-aminomutase 1 (GSA 1) (glutamate-1-semialdehyde aminotransferase 1) (GSA-AT 1) | 2 Gained_in_A  |
| At3g48750 | At5g63610 | cell division control protein 2 homolog A (CDC2A)                                                           | protein kinase, putative                                                                                    | 2 Uncertain    |
| At3g48750 | At5g63610 | cell division control protein 2 homolog A (CDC2A)                                                           | protein kinase, putative                                                                                    | 3 Uncertain    |
| At3g48750 | At5g63610 | cell division control protein 2 homolog A (CDC2A)                                                           | protein kinase, putative                                                                                    | 4 Uncertain    |
| At3g48750 | At5g63610 | cell division control protein 2 homolog A (CDC2A)                                                           | protein kinase, putative                                                                                    | 5 Uncertain    |
| At3g48750 | At5g63610 | cell division control protein 2 homolog A (CDC2A)                                                           | protein kinase, putative                                                                                    | 6 Uncertain    |
| At3g48750 | At5g63610 | cell division control protein 2 homolog A (CDC2A)                                                           | protein kinase, putative                                                                                    | 7 Uncertain    |
| At5g49940 | At4g24330 | expressed protein                                                                                           | expressed protein                                                                                           | 2 Uncertain    |
| At4g24330 | At5g49940 | expressed protein                                                                                           | expressed protein                                                                                           | 3 Uncertain    |
| At4g24890 | At5g50400 | calcineurin-like phosphoesterase family protein                                                             | calcineurin-like phosphoesterase family                                                                     | 11 Gained_in_A |
| At4g24890 | At5g50400 | calcineurin-like phosphoesterase family protein                                                             | calcineurin-like phosphoesterase family                                                                     | 12 Uncertain   |
| At5g50720 | At4g24960 | expressed protein                                                                                           | ABA-responsive protein (HVA22d)                                                                             | 3 Uncertain    |
| At4g25320 | At5g51590 | DNA-binding protein-related                                                                                 | expressed protein                                                                                           | 1 Uncertain    |
| At5g51590 | At4g25320 | expressed protein                                                                                           | DNA-binding protein-related                                                                                 | 2 Uncertain    |
| At4g25440 | At5g51980 | WD-40 repeat family protein / zfw1 protein (ZFW1)                                                           | expressed protein                                                                                           | 1 Gained_in_A  |
| At5g57240 | At4g25860 | oxysterol-binding protein-related                                                                           | oxysterol-binding family protein                                                                            | 6 Uncertain    |
| At4g26140 | At5g56870 | beta-galactosidase, putative / lactase, putative                                                            | glycosyl hydrolase family 35 (beta-galactosidase)                                                           | 17 Uncertain   |
| At4g26270 | At5g56630 | phosphofructokinase family protein                                                                          | pyrophosphate-dependent phosphofructo-1-kinase-related protein                                              | 11 Uncertain   |
| At4g26270 | At5g56630 | phosphofructokinase family protein                                                                          | pyrophosphate-dependent phosphofructo-1-kinase-related protein                                              | 4 Uncertain    |
| At4g26270 | At5g56630 | phosphofructokinase family protein                                                                          | pyrophosphate-dependent phosphofructo-1-kinase-related protein                                              | 8 Uncertain    |
| At4g26540 | At5g56040 | protein kinase family protein                                                                               | leucine rich repeat protein kinase, putative                                                                | 1 Uncertain    |
| At4g26540 | At5g56040 | protein kinase family protein                                                                               | leucine rich repeat protein kinase, putative                                                                | 2 Uncertain    |
| At4g26540 | At5g56040 | protein kinase family protein                                                                               | leucine rich repeat protein kinase, putative                                                                | 3 Uncertain    |
| At5g55990 | At4g26570 | calcineurin B-like protein 2 (qblAAC26009.1)                                                                | calcineurin B-like protein 3 (CBL3)                                                                         | 5 Uncertain    |
| At5g55520 | At4g26660 | hypothetical protein                                                                                        | expressed protein                                                                                           | 2 Uncertain    |
| At5g55480 | At4g26690 | expressed protein                                                                                           | glycerophosphoryl diester phosphodiesterase family protein                                                  | 3 Gained_in_A  |
| At5g55070 | At4g26910 | 2-oxoglutarate dehydrogenase E2 subunit                                                                     | 2-oxoacid dehydrogenase family protein                                                                      | 4 Uncertain    |
| At4g26930 | At5g55020 | myb family transcription factor (MYB97)                                                                     | expressed protein                                                                                           | 2 Uncertain    |
| At5g54920 | At4g26990 | expressed protein                                                                                           | expressed protein                                                                                           | 3 Uncertain    |
| At5g54780 | At4g27100 | expressed protein                                                                                           | RabGAP/TBC domain-containing protein                                                                        | 11 Uncertain   |
| At5g54190 | At4g27440 | protochlorophyllide reductase A (PCR A/POR A)                                                               | protochlorophyllide reductase B, chloroplast / PCR B / NADPH-protochlorophyllide oxidoreductase B (PORB)    | 1 Uncertain    |
| At5g54100 | At4g27580 | expressed protein                                                                                           | expressed protein                                                                                           | 7 Uncertain    |
| At4g27580 | At5g54100 | expressed protein                                                                                           | expressed protein                                                                                           | 8 Uncertain    |
| At5g53510 | At4g27730 | isp4 protein                                                                                                | oligopeptide transporter OPT family protein                                                                 | 2 Uncertain    |
| At5g53510 | At4g27730 | isp4 protein                                                                                                | oligopeptide transporter OPT family protein                                                                 | 4 Uncertain    |
| At5g53400 | At4g27890 | expressed protein                                                                                           | nuclear movement family protein                                                                             | 2 Uncertain    |
| At5g53400 | At4g27890 | expressed protein                                                                                           | nuclear movement family protein                                                                             | 3 Uncertain    |
| At5g53400 | At4g27890 | expressed protein                                                                                           | nuclear movement family protein                                                                             | 5 Uncertain    |
| At5g60780 | At3g45060 | high affinity nitrate transporter protein - like                                                            | high-affinity nitrate transporter, putative                                                                 | 2 Gained_in_A  |
| At5g60550 | At3g45240 | protein kinase family                                                                                       | protein kinase family protein                                                                               | 8 Uncertain    |

|           |           |                                                                                             |                                                                                             |               |
|-----------|-----------|---------------------------------------------------------------------------------------------|---------------------------------------------------------------------------------------------|---------------|
| At5g60250 | At3g45560 | hypothetical protein                                                                        | zinc finger (C3HC4-type RING finger) family protein                                         | 4 Uncertain   |
| At5g59740 | At3g46180 | protein serine /threonine kinase - like protein                                             | UDP-galactose/UDP-glucose transporter-related                                               | 3 Uncertain   |
| At5g59290 | At3g46440 | NAD-dependent epimerase/dehydratase family protein                                          | NAD-dependent epimerase/dehydratase family protein                                          | 4 Uncertain   |
| At3g46460 | At5g59300 | ubiquitin-conjugating enzyme 13 (UBC13)                                                     | ubiquitin-conjugating enzyme 7 (UBC7)                                                       | 1 Uncertain   |
| At3g49700 | At5g65800 | 1-aminocyclopropane-1-carboxylate synthase, putative / ACC synthase, putative               | 1-aminocyclopropane-1-carboxylate synthase (ACC synthase), putative                         | 1 Lost_in_B   |
| At5g67540 | At3g49880 | glycosyl hydrolase family 43                                                                | glycosyl hydrolase family protein 43                                                        | 1 Uncertain   |
| At3g50100 | At5g67240 | exonuclease family protein                                                                  | exonuclease protein family                                                                  | 6 Uncertain   |
| At5g66260 | At3g51200 | auxin-induced (indole-3-acetic acid induced) protein, putative expressed protein            | auxin-responsive family protein                                                             | 1 Gained_in_A |
| At5g66230 | At3g51230 | hypothetical protein                                                                        | hypothetical protein                                                                        | 1 Uncertain   |
| At3g51230 | At5g66230 | expressed protein                                                                           | expressed protein                                                                           | 2 Uncertain   |
| At5g66230 | At3g51230 | hypothetical protein                                                                        | hypothetical protein                                                                        | 3 Uncertain   |
| At4g04340 | At4g22120 | early-responsive to dehydration protein-related / ERD protein-related                       | early-responsive to dehydration protein-related / ERD protein-related                       | 6 Uncertain   |
| At4g04340 | At4g22120 | early-responsive to dehydration protein-related / ERD protein-related                       | early-responsive to dehydration protein-related / ERD protein-related                       | 8 Uncertain   |
| At4g22030 | At4g04480 | F-box family protein                                                                        | hypothetical protein                                                                        | 1 Uncertain   |
| At4g21880 | At4g04790 | pentatricopeptide (PPR) repeat-containing protein                                           | pentatricopeptide (PPR) repeat-containing protein                                           | 2 Uncertain   |
| At4g04890 | At4g21750 | homeobox-leucine zipper protein protodermal factor 2 (PDF2)                                 | L1 specific homeobox gene (ML1) / ovule-specific homeobox protein A20                       | 3 Uncertain   |
| At4g05210 | At4g21220 | bacterial transferase hexapeptide repeat-containing protein                                 | bacterial transferase hexapeptide repeat-containing protein                                 | 1 Uncertain   |
| At1g32790 | At4g10610 | RNA-binding protein, putative                                                               | RNA-binding protein, putative                                                               | 7 Uncertain   |
| At4g10590 | At1g32850 | ubiquitin carboxyl-terminal hydrolase family protein                                        | ubiquitin carboxyl-terminal hydrolase family protein                                        | 11 Lost_in_B  |
| At4g10550 | At1g32960 | subtilase family protein                                                                    | subtilase family protein                                                                    | 7 Uncertain   |
| At1g34740 | At4g08880 | Ulp1 protease family protein                                                                | Ulp1 protease family protein                                                                | 10 Uncertain  |
| At4g08880 | At1g34740 | Ulp1 protease family protein                                                                | Ulp1 protease family protein                                                                | 11 Uncertain  |
| At1g35470 | At4g09250 | SPLa/Ryanodine receptor (SPRY) domain-containing protein                                    | SPLa/Ryanodine receptor (SPRY) domain-containing protein                                    | 4 Uncertain   |
| At1g35515 | At4g09460 | myb family transcription factor (MYB8)                                                      | myb family transcription factor                                                             | 1 Uncertain   |
| At1g29470 | At2g34300 | dehydration-responsive protein-related                                                      | dehydration-responsive protein-related                                                      | 6 Uncertain   |
| At1g29540 | At2g34330 | hypothetical protein                                                                        | expressed protein                                                                           | 1 Uncertain   |
| At1g29760 | At2g34380 | expressed protein                                                                           | expressed protein                                                                           | 1 Uncertain   |
| At1g29970 | At2g34480 | expressed protein                                                                           | 60S ribosomal protein L18A (RPL18aB)                                                        | 5 Uncertain   |
| At2g34590 | At1g30120 | transketolase family protein                                                                | pyruvate dehydrogenase E1 component beta subunit, chloroplast                               | 5 Gained_in_A |
| At1g30400 | At2g34660 | glutathione S-conjugate ABC transporter (MRP1)                                              | glutathione S-conjugate ABC transporter (MRP2)                                              | 23 Lost_in_B  |
| At1g30490 | At2g34710 | homeobox-leucine zipper transcription factor (HB-9)                                         | homeobox-leucine zipper transcription factor (HB-14)                                        | 6 Uncertain   |
| At1g30620 | At2g34850 | UDP-D-xylose 4-epimerase, putative (MUR4)                                                   | NAD-dependent epimerase/dehydratase family protein                                          | 5 Uncertain   |
| At1g30760 | At2g34810 | FAD-binding domain-containing protein                                                       | FAD-binding domain-containing protein                                                       | 1 Uncertain   |
| At1g30760 | At2g34810 | FAD-binding domain-containing protein                                                       | FAD-binding domain-containing protein                                                       | 2 Uncertain   |
| At2g34880 | At1g30810 | transcription factor jumonji (jmi) family protein / zinc finger (C5HC2 type) family protein | transcription factor jumonji (jmi) family protein / zinc finger (C5HC2 type) family protein | 10 Uncertain  |
| At2g34880 | At1g30810 | transcription factor jumonji (jmi) family protein / zinc finger (C5HC2 type) family protein | transcription factor jumonji (jmi) family protein / zinc finger (C5HC2 type) family protein | 2 Uncertain   |
| At2g34880 | At1g30810 | transcription factor jumonji (jmi) family protein / zinc finger (C5HC2 type) family protein | transcription factor jumonji (jmi) family protein / zinc finger (C5HC2 type) family protein | 5 Lost_in_B   |
| At1g30810 | At2g34880 | transcription factor jumonji (jmi) family protein / zinc finger (C5HC2 type) family protein | transcription factor jumonji (jmi) family protein / zinc finger (C5HC2 type) family protein | 8 Uncertain   |
| At1g30820 | At2g34890 | CTP synthase, putative / UTP--ammonia liqase, putative                                      | CTP synthase, putative / UTP--ammonia ligase, putative                                      | 11 Uncertain  |
| At1g30820 | At2g34890 | CTP synthase, putative / UTP--ammonia ligase, putative                                      | CTP synthase, putative / UTP--ammonia ligase, putative                                      | 16 Lost_in_B  |
| At1g30820 | At2g34890 | CTP synthase, putative / UTP--ammonia ligase, putative                                      | CTP synthase, putative / UTP--ammonia ligase, putative                                      | 19 Lost_in_B  |

|           |           |                                                                               |                                                                                     |    |             |
|-----------|-----------|-------------------------------------------------------------------------------|-------------------------------------------------------------------------------------|----|-------------|
| At1g30820 | At2g34890 | CTP synthase, putative / UTP--ammonia ligase, putative                        | CTP synthase, putative / UTP--ammonia ligase, putative                              | 6  | Uncertain   |
| At2g34920 | At1g30860 | ubiquitin-protein ligase-related                                              | expressed protein                                                                   | 10 | Uncertain   |
| At2g35060 | At1g31120 | potassium transporter family protein                                          | potassium transporter family protein                                                | 8  | Gained_in_A |
| At2g33460 | At1g04450 | p21-rho-binding domain-containing protein                                     | p21-rho-binding domain-containing protein                                           | 3  | Uncertain   |
| At2g33420 | At1g04470 | expressed protein                                                             | expressed protein                                                                   | 3  | Uncertain   |
| At2g33370 | At1g04480 | 60S ribosomal protein L23 (RPL23B)                                            | 60S ribosomal protein L23 (RPL23A)                                                  | 3  | Uncertain   |
| At1g05580 | At2g31910 | cation/hydrogen exchanger, putative (CHX23)                                   | cation/hydrogen exchanger, putative                                                 | 3  | Gained_in_A |
| At2g31790 | At1g05670 | UDP-glucuronosyl/UDP-glucosyl transferase family protein                      | UDP-glucuronosyl/UDP-glucosyl transferase family protein                            | 1  | Gained_in_A |
| At1g05900 | At2g31480 | endonuclease-related                                                          | expressed protein                                                                   | 4  | Uncertain   |
| At1g05900 | At2g31480 | endonuclease-related                                                          | expressed protein                                                                   | 6  | Uncertain   |
| At1g05900 | At2g31480 | endonuclease-related                                                          | expressed protein                                                                   | 8  | Uncertain   |
| At1g05900 | At2g31480 | endonuclease-related                                                          | expressed protein                                                                   | 9  | Uncertain   |
| At1g06250 | At2g31100 | lipase class 3 family protein                                                 | lipase, putative                                                                    | 2  | Uncertain   |
| At2g30240 | At1g06970 | cation/hydrogen exchanger, putative (CHX13)                                   | cation/hydrogen exchanger, putative (CHX14)                                         | 3  | Uncertain   |
| At1g07160 | At2g30020 | protein phosphatase 2C, putative / PP2C, putative                             | protein phosphatase 2C, putative / PP2C, putative                                   | 2  | Lost_in_B   |
| At1g08040 | At2g28310 | expressed protein                                                             | expressed protein                                                                   | 12 | Uncertain   |
| At1g08040 | At2g28310 | expressed protein                                                             | expressed protein                                                                   | 13 | Uncertain   |
| At2g27530 | At1g08360 | 60S ribosomal protein L10A (RPL10aB)                                          | 60S ribosomal protein L10A (RPL10aA)                                                | 4  | Uncertain   |
| At1g08410 | At2g27200 | GTP-binding family protein                                                    | GTP-binding family protein                                                          | 2  | Uncertain   |
| At1g08730 | At2g31900 | myosin heavy chain (PCR43)                                                    | myosin family protein                                                               | 2  | Uncertain   |
| At2g31900 | At1g08730 | myosin family protein                                                         | myosin heavy chain (PCR43)                                                          | 33 | Uncertain   |
| At1g09080 | At2g32120 | luminal binding protein 3 (BiP-3) (BP3)                                       | heat shock protein 70 family protein / HSP70 family protein                         | 2  | Uncertain   |
| At1g09080 | At2g32120 | luminal binding protein 3 (BiP-3) (BP3)                                       | heat shock protein 70 family protein / HSP70 family protein                         | 4  | Uncertain   |
| At1g09080 | At2g32120 | luminal binding protein 3 (BiP-3) (BP3)                                       | heat shock protein 70 family protein / HSP70 family protein                         | 5  | Uncertain   |
| At3g52360 | At2g35850 | expressed protein                                                             | hypothetical protein                                                                | 1  | Uncertain   |
| At2g36190 | At3g52600 | beta-fructosidase, putative / beta-fructofuranosidase, putative               | beta-fructosidase, putative / beta-fructofuranosidase, putative                     | 3  | Gained_in_A |
| At3g52750 | At2g36250 | chloroplast division protein, putative                                        | chloroplast division protein FtsZ (FtsZ2-1)                                         | 6  | Uncertain   |
| At2g37940 | At3g54020 | expressed protein                                                             | phosphatidic acid phosphatase-related / PAP2-related                                | 10 | Uncertain   |
| At2g37960 | At3g54060 | expressed protein                                                             | hypothetical protein                                                                | 7  | Uncertain   |
| At2g38430 | At3g54310 | expressed protein                                                             | hypothetical protein                                                                | 3  | Uncertain   |
| At3g54830 | At2g39130 | amino acid transporter family protein                                         | amino acid transporter family protein                                               | 5  | Lost_in_B   |
| At3g55600 | At2g39790 | expressed protein                                                             | mitochondrial glycoprotein family protein / MAM33 family protein                    | 1  | Uncertain   |
| At3g55600 | At2g39790 | expressed protein                                                             | mitochondrial glycoprotein family protein / MAM33 family protein                    | 3  | Uncertain   |
| At2g39790 | At3g55600 | mitochondrial glycoprotein family protein / MAM33 family protein              | expressed protein                                                                   | 4  | Uncertain   |
| At3g55600 | At2g39790 | expressed protein                                                             | mitochondrial glycoprotein family protein / MAM33 family protein                    | 7  | Uncertain   |
| At3g55620 | At2g39820 | eukaryotic translation initiation factor 6, putative / eIF-6, putative        | eukaryotic translation initiation factor 6, putative / eIF-6, putative              | 3  | Uncertain   |
| At3g55620 | At2g39820 | eukaryotic translation initiation factor 6, putative / eIF-6, putative        | eukaryotic translation initiation factor 6, putative / eIF-6, putative              | 5  | Uncertain   |
| At3g56170 | At2g40410 | Ca(2+)-dependent nuclease                                                     | Ca(2+)-dependent nuclease, putative                                                 | 5  | Uncertain   |
| At2g40410 | At3g56170 | Ca(2+)-dependent nuclease, putative                                           | Ca(2+)-dependent nuclease                                                           | 7  | Uncertain   |
| At2g41100 | At3g56800 | touch-responsive protein / calmodulin-related protein 3, touch-induced (TCH3) | calmodulin-2/3/5 (CAM3)                                                             | 3  | Gained_in_A |
| At3g57410 | At2g41740 | villin 3 (VLN3)                                                               | villin 2 (VLN2)                                                                     | 21 | Uncertain   |
| At3g57530 | At2g41860 | calcium-dependent protein kinase, putative / CDPK, putative                   | calcium-dependent protein kinase, putative / CDPK, putative                         | 6  | Uncertain   |
| At3g57980 | At2g42150 | DNA-binding bromodomain-containing protein                                    | DNA-binding bromodomain-containing protein                                          | 1  | Lost_in_B   |
| At2g42790 | At3g58750 | citrate synthase, glyoxysomal, putative                                       | citrate synthase, glyoxysomal, putative                                             | 8  | Uncertain   |
| At3g58780 | At2g42830 | agamous-like MADS box protein AGL1 / shatterproof 1 (AGL1) (SHP1)             | agamous-like MADS box protein AGL5 / floral homeodomain transcription factor (AGL5) | 3  | Gained_in_A |
| At2g43020 | At3g59050 | amine oxidase family protein                                                  | amine oxidase family protein                                                        | 2  | Gained_in_A |
| At3g59050 | At2g43020 | amine oxidase family protein                                                  | amine oxidase family protein                                                        | 9  | Uncertain   |

|           |           |                                                                                                          |                                                                                                          |    |             |
|-----------|-----------|----------------------------------------------------------------------------------------------------------|----------------------------------------------------------------------------------------------------------|----|-------------|
| At2g43240 | At3g59360 | nucleotide-sugar transporter family protein                                                              | nucleotide-sugar transporter family protein                                                              | 6  | Uncertain   |
| At2g43500 | At3g59580 | RWP-RK domain-containing protein                                                                         | RWP-RK domain-containing protein                                                                         | 2  | Uncertain   |
| At3g59690 | At2g43680 | calmodulin-binding family protein                                                                        | calmodulin-binding family protein                                                                        | 3  | Uncertain   |
| At2g43850 | At3g59830 | ankyrin protein kinase, putative (APK1)                                                                  | ankyrin protein kinase, putative                                                                         | 6  | Uncertain   |
| At2g43940 | At3g59870 | thiol methyltransferase, putative                                                                        | expressed protein                                                                                        | 5  | Uncertain   |
| At2g44100 | At3g59920 | Rab GDP dissociation inhibitor (GDI1)                                                                    | Rab GDP dissociation inhibitor (GDI2)                                                                    | 2  | Lost_in_B   |
| At2g44150 | At3g59960 | SET domain-containing protein (ASHH3)                                                                    | SET domain-containing protein                                                                            | 9  | Uncertain   |
| At3g59990 | At2g44180 | methionyl aminopeptidase, putative / methionine aminopeptidase, putative / peptidase M, putative         | methionyl aminopeptidase, putative / methionine aminopeptidase, putative / peptidase M, putative         | 4  | Uncertain   |
| At2g44350 | At3g60100 | citrate synthase, mitochondrial, putative                                                                | citrate synthase, mitochondrial, putative                                                                | 7  | Uncertain   |
| At3g60100 | At2g44350 | citrate synthase, mitochondrial, putative                                                                | citrate synthase, mitochondrial, putative                                                                | 8  | Uncertain   |
| At2g44470 | At3g60140 | glycosyl hydrolase family 1 protein                                                                      | glycosyl hydrolase family 1 protein                                                                      | 7  | Uncertain   |
| At2g44900 | At3g60350 | armadillo/beta-catenin repeat family protein / F-box family protein                                      | armadillo/beta-catenin repeat family protein / F-box family protein                                      | 1  | Uncertain   |
| At2g44900 | At3g60350 | armadillo/beta-catenin repeat family protein / F-box family protein                                      | armadillo/beta-catenin repeat family protein / F-box family protein                                      | 9  | Uncertain   |
| At3g60640 | At2g45170 | autophagy 8g (APG8g)                                                                                     | autophagy 8e (APG8e)                                                                                     | 4  | Uncertain   |
| At3g60730 | At2g45220 | pectinesterase family protein                                                                            | pectinesterase family protein                                                                            | 3  | Gained_in_A |
| At3g60730 | At2g45220 | pectinesterase family protein                                                                            | pectinesterase family protein                                                                            | 4  | Gained_in_A |
| At3g61230 | At2g45800 | LIM domain-containing protein                                                                            | LIM domain-containing protein                                                                            | 2  | Uncertain   |
| At3g61260 | At2g45820 | DNA-binding family protein / remorin family protein                                                      | DNA-binding protein, putative                                                                            | 4  | Uncertain   |
| At3g61380 | At2g45900 | expressed protein                                                                                        | expressed protein                                                                                        | 5  | Uncertain   |
| At2g45900 | At3g61380 | expressed protein                                                                                        | expressed protein                                                                                        | 6  | Uncertain   |
| At3g61530 | At2g46110 | ketopantoate hydroxymethyltransferase family protein                                                     | ketopantoate hydroxymethyltransferase family protein                                                     | 2  | Uncertain   |
| At3g61560 | At2g46170 | reticulon family protein (RTNLB6)                                                                        | reticulon family protein (RTNLB5)                                                                        | 4  | Lost_in_B   |
| At2g46530 | At3g61830 | transcriptional factor B3 family protein / auxin-responsive factor AUX/IAA-related                       | transcriptional factor B3 family protein / auxin-responsive factor AUX/IAA-related                       | 12 | Uncertain   |
| At3g61830 | At2g46530 | transcriptional factor B3 family protein / auxin-responsive factor AUX/IAA-related                       | transcriptional factor B3 family protein / auxin-responsive factor AUX/IAA-related                       | 4  | Uncertain   |
| At3g61900 | At2g46690 | auxin-responsive family protein                                                                          | auxin-responsive family protein                                                                          | 1  | Uncertain   |
| At3g62070 | At2g46940 | expressed protein                                                                                        | expressed protein                                                                                        | 1  | Uncertain   |
| At2g47000 | At3g62150 | multidrug resistant (MDR) ABC transporter, putative                                                      | multidrug resistant (MDR) ABC transporter, putative                                                      | 4  | Uncertain   |
| At3g62150 | At2g47000 | multidrug resistant (MDR) ABC transporter, putative                                                      | multidrug resistant (MDR) ABC transporter, putative                                                      | 6  | Uncertain   |
| At2g47230 | At3g62300 | agenet domain-containing protein                                                                         | agenet domain-containing protein                                                                         | 6  | Uncertain   |
| At2g47630 | At3g62860 | esterase/lipase/thioesterase family protein                                                              | esterase/lipase/thioesterase family protein                                                              | 7  | Uncertain   |
| At2g47640 | At3g62840 | small nuclear ribonucleoprotein D2, putative / snRNP core protein D2, putative / Sm protein D2, putative | small nuclear ribonucleoprotein D2, putative / snRNP core protein D2, putative / Sm protein D2, putative | 3  | Uncertain   |
| At2g47800 | At3g62700 | glutathione-conjugate transporter (MRP4)                                                                 | glutathione-conjugate transporter, putative                                                              | 1  | Uncertain   |
| At2g47800 | At3g62700 | glutathione-conjugate transporter (MRP4)                                                                 | glutathione-conjugate transporter, putative                                                              | 7  | Uncertain   |
| At1g52240 | At3g16130 | expressed protein                                                                                        | expressed protein                                                                                        | 3  | Lost_in_B   |
| At3g16130 | At1g52240 | expressed protein                                                                                        | expressed protein                                                                                        | 4  | Lost_in_B   |
| At3g15950 | At1g52410 | DNA topoisomerase-related                                                                                | caldesmon-related                                                                                        | 27 | Uncertain   |
| At3g15950 | At1g52410 | DNA topoisomerase-related                                                                                | caldesmon-related                                                                                        | 28 | Uncertain   |
| At3g15940 | At1g52420 | glycosyl transferase family 1 protein                                                                    | glycosyl transferase family 1 protein                                                                    | 3  | Uncertain   |
| At3g15460 | At1g52930 | brix domain-containing protein                                                                           | brix domain-containing protein                                                                           | 5  | Uncertain   |
| At3g15110 | At1g53180 | expressed protein                                                                                        | expressed protein                                                                                        | 2  | Uncertain   |
| At3g14840 | At1g53440 | leucine-rich repeat family protein / protein kinase family protein                                       | leucine-rich repeat family protein / protein kinase family protein                                       | 25 | Lost_in_B   |
| At1g53590 | At3g14590 | C2 domain-containing protein                                                                             | C2 domain-containing protein                                                                             | 10 | Uncertain   |
| At1g53650 | At3g14450 | RNA-binding protein, putative                                                                            | RNA-binding protein, putative                                                                            | 8  | Uncertain   |
| At3g14020 | At1g54160 | CCAAT-binding transcription factor (CBF-B/NF-YA) family protein                                          | CCAAT-binding transcription factor (CBF-B/NF-YA) family protein                                          | 1  | Uncertain   |

|           |           |                                                                                                               |                                                                                                 |               |
|-----------|-----------|---------------------------------------------------------------------------------------------------------------|-------------------------------------------------------------------------------------------------|---------------|
| At3g14020 | At1g54160 | CCAAT-binding transcription factor (CBF-B/NF-YA) family protein                                               | CCAAT-binding transcription factor (CBF-B/NF-YA) family protein                                 | 2 Uncertain   |
| At5g08190 | At5g23090 | DR1-related protein                                                                                           | TATA-binding protein-associated phosphoprotein Dr1 protein homolog (sp P49592)                  | 3 Uncertain   |
| At5g08350 | At5g23350 | expressed protein                                                                                             | ABA-responsive protein -related                                                                 | 1 Uncertain   |
| At5g23490 | At5g08440 | hypothetical protein                                                                                          | expressed protein                                                                               | 12 Uncertain  |
| At5g44110 | At1g03900 | ABC transporter family protein                                                                                | expressed protein                                                                               | 4 Gained_in_A |
| At1g03900 | At5g44110 | expressed protein                                                                                             | ABC transporter family protein                                                                  | 7 Uncertain   |
| At5g43990 | At1g04050 | SET-domain transcriptional regulator family                                                                   | SET domain-containing protein / suppressor of variegation related 1 (SUVR1)                     | 2 Uncertain   |
| At5g43900 | At1g04160 | myosin heavy chain MYA2 (pir I551824)                                                                         | myosin family protein                                                                           | 39 Uncertain  |
| At1g04180 | At5g43890 | flavin-containing monooxygenase family protein / FMO family protein                                           | flavin-containing monooxygenase (FMO) family                                                    | 1 Gained_in_A |
| At3g48830 | At5g23690 | polynucleotide adenyltransferase family protein / RNA recognition motif (RRM)-containing protein              | expressed protein                                                                               | 19 Uncertain  |
| At3g48830 | At5g23690 | polynucleotide adenyltransferase family protein / RNA recognition motif (RRM)-containing protein              | expressed protein                                                                               | 20 Uncertain  |
| At3g48860 | At5g23700 | expressed protein                                                                                             | hypothetical protein                                                                            | 12 Uncertain  |
| At3g04910 | At5g28080 | protein kinase family protein                                                                                 | protein kinase family                                                                           | 6 Lost_in_B   |
| At3g04940 | At5g28020 | cysteine synthase, putative / O-acetylserine (thiol)-lyase, putative / O-acetylserine sulfhydrylase, putative | cysteine synthase (O-acetylserine (thiol)-lyase/O-acetylserine sulfhydrylase), putative         | 2 Uncertain   |
| At3g05030 | At5g27150 | sodium proton exchanger, putative (NHX2)                                                                      | sodium proton exchanger (NHX1)                                                                  | 10 Uncertain  |
| At5g27540 | At3g05310 | GTP-binding protein - related                                                                                 | GTP-binding protein-related                                                                     | 10 Uncertain  |
| At5g27540 | At3g05310 | GTP-binding protein - related                                                                                 | GTP-binding protein-related                                                                     | 11 Uncertain  |
| At5g27540 | At3g05310 | GTP-binding protein - related                                                                                 | GTP-binding protein-related                                                                     | 9 Uncertain   |
| At5g26751 | At3g05840 | shaggy-related protein kinase alpha                                                                           | shaggy-related protein kinase gamma / ASK-gamma (ASK3)                                          | 5 Uncertain   |
| At5g26340 | At3g05960 | hexose transporter, putative                                                                                  | sugar transporter, putative                                                                     | 2 Uncertain   |
| At5g26340 | At3g05960 | hexose transporter, putative                                                                                  | sugar transporter, putative                                                                     | 3 Gained_in_A |
| At3g05960 | At5g26340 | sugar transporter, putative                                                                                   | hexose transporter, putative                                                                    | 4 Gained_in_A |
| At5g22650 | At3g44750 | histone deacetylase-related protein                                                                           | histone deacetylase, putative (HD2A)                                                            | 3 Uncertain   |
| At3g44750 | At5g22650 | histone deacetylase, putative (HD2A)                                                                          | histone deacetylase-related protein                                                             | 4 Uncertain   |
| At5g22650 | At3g44750 | histone deacetylase-related protein                                                                           | histone deacetylase, putative (HD2A)                                                            | 7 Uncertain   |
| At3g44940 | At5g22930 | expressed protein                                                                                             | hypothetical protein                                                                            | 1 Uncertain   |
| At5g22950 | At3g45000 | expressed protein                                                                                             | SNF7 family protein                                                                             | 2 Uncertain   |
| At5g47770 | At4g17190 | farnesyl pyrophosphate synthetase 1 (FPS1) [farnesyl diphosphate synthase 1]                                  | farnesyl pyrophosphate synthetase 2 (FPS2) / FPP synthetase 2 / farnesyl diphosphate synthase 2 | 4 Uncertain   |
| At4g17680 | At5g47050 | expressed protein                                                                                             | expressed protein                                                                               | 1 Uncertain   |
| At4g17710 | At5g46880 | homeobox-leucine zipper family protein / lipid-binding START domain-containing protein                        | homeodomain protein                                                                             | 7 Uncertain   |
| At5g46880 | At4g17710 | homeodomain protein                                                                                           | homeobox-leucine zipper family protein / lipid-binding START domain-containing protein          | 8 Uncertain   |
| At4g17890 | At5g46740 | human Rev interacting-like family protein / hRIP family protein                                               | ubiquitin-specific protease 21 (UBP21)                                                          | 1 Uncertain   |
| At4g17890 | At5g46740 | human Rev interacting-like family protein / hRIP family protein                                               | ubiquitin-specific protease 21 (UBP21)                                                          | 14 Uncertain  |
| At4g17890 | At5g46740 | human Rev interacting-like family protein / hRIP family protein                                               | ubiquitin-specific protease 21 (UBP21)                                                          | 2 Uncertain   |
| At5g46740 | At4g17890 | ubiquitin-specific protease 21 (UBP21)                                                                        | human Rev interacting-like family protein / hRIP family protein                                 | 4 Uncertain   |
| At5g46740 | At4g17890 | ubiquitin-specific protease 21 (UBP21)                                                                        | human Rev interacting-like family protein / hRIP family protein                                 | 7 Uncertain   |
| At5g46430 | At4g18100 | 60S ribosomal protein L32 (RPL32B)                                                                            | 60S ribosomal protein L32 (RPL32A)                                                              | 2 Lost_in_B   |
| At5g46380 | At4g18150 | hypothetical protein                                                                                          | hypothetical protein                                                                            | 10 Uncertain  |
| At5g46380 | At4g18150 | hypothetical protein                                                                                          | hypothetical protein                                                                            | 6 Uncertain   |
| At5g46380 | At4g18150 | hypothetical protein                                                                                          | hypothetical protein                                                                            | 8 Uncertain   |
| At4g18290 | At5g46240 | inward rectifying potassium channel (KAT2)                                                                    | inward rectifying potassium channel (KAT1)                                                      | 8 Uncertain   |
| At4g18375 | At5g46190 | KH domain-containing protein                                                                                  | KH domain protein                                                                               | 2 Uncertain   |
| At4g18630 | At5g45850 | expressed protein                                                                                             | expressed protein                                                                               | 1 Uncertain   |

|           |           |                                                                                                                                                                     |                                                                                                                                                                     |               |
|-----------|-----------|---------------------------------------------------------------------------------------------------------------------------------------------------------------------|---------------------------------------------------------------------------------------------------------------------------------------------------------------------|---------------|
| At5g45830 | At4g18690 | tumor-related protein-like                                                                                                                                          | hypothetical protein                                                                                                                                                | 1 Uncertain   |
| At5g45830 | At4g18690 | tumor-related protein-like                                                                                                                                          | hypothetical protein                                                                                                                                                | 3 Uncertain   |
| At4g19230 | At5g45340 | cytochrome P450 family protein                                                                                                                                      | cytochrome P450 family                                                                                                                                              | 5 Uncertain   |
| At5g44480 | At4g20460 | NAD-dependent epimerase/dehydratase family                                                                                                                          | NAD-dependent epimerase/dehydratase family protein                                                                                                                  | 8 Uncertain   |
| At1g55510 | At3g13450 | 2-oxoisovalerate dehydrogenase, putative / 3-methyl-2-oxobutanoate dehydrogenase, putative / branched-chain alpha-keto acid dehydrogenase E1 beta subunit, putative | 2-oxoisovalerate dehydrogenase / 3-methyl-2-oxobutanoate dehydrogenase / branched-chain alpha-keto acid dehydrogenase E1 beta subunit (DIN4)                        | 2 Gained_in_A |
| At3g13450 | At1g55510 | 2-oxoisovalerate dehydrogenase / 3-methyl-2-oxobutanoate dehydrogenase / branched-chain alpha-keto acid dehydrogenase E1 beta subunit (DIN4)                        | 2-oxoisovalerate dehydrogenase, putative / 3-methyl-2-oxobutanoate dehydrogenase, putative / branched-chain alpha-keto acid dehydrogenase E1 beta subunit, putative | 6 Uncertain   |
| At3g13222 | At1g55820 | expressed protein                                                                                                                                                   | hydroxyproline-rich glycoprotein family protein                                                                                                                     | 11 Uncertain  |
| At3g12980 | At1g55970 | histone acetyltransferase 5 (HAC5)                                                                                                                                  | histone acetyltransferase 4 (HAC4)                                                                                                                                  | 2 Uncertain   |
| At3g12980 | At1g55970 | histone acetyltransferase 5 (HAC5)                                                                                                                                  | histone acetyltransferase 4 (HAC4)                                                                                                                                  | 3 Uncertain   |
| At1g55970 | At3g12980 | histone acetyltransferase 4 (HAC4)                                                                                                                                  | histone acetyltransferase 5 (HAC5)                                                                                                                                  | 4 Uncertain   |
| At4g24100 | At4g10730 | protein kinase family protein                                                                                                                                       | protein kinase family protein                                                                                                                                       | 11 Uncertain  |
| At4g10730 | At4g24100 | protein kinase family protein                                                                                                                                       | protein kinase family protein                                                                                                                                       | 12 Uncertain  |
| At4g24080 | At4g10750 | HpcH/HpaI aldolase family protein                                                                                                                                   | HpcH/HpaI aldolase family protein                                                                                                                                   | 2 Uncertain   |
| At4g11070 | At4g23810 | WRKY family transcription factor                                                                                                                                    | WRKY family transcription factor                                                                                                                                    | 2 Gained_in_A |
| At4g23160 | At4g11530 | protein kinase family protein                                                                                                                                       | protein kinase family protein                                                                                                                                       | 5 Uncertain   |
| At4g11530 | At4g23160 | protein kinase family protein                                                                                                                                       | protein kinase family protein                                                                                                                                       | 6 Uncertain   |
| At4g11740 | At4g23040 | ara4-interacting protein, putative (SAY1)                                                                                                                           | UBX domain-containing protein                                                                                                                                       | 4 Uncertain   |
| At4g11810 | At4g22990 | SPX (SYG1/Pho81/XPR1) domain-containing protein                                                                                                                     | SPX (SYG1/Pho81/XPR1) domain-containing protein                                                                                                                     | 4 Gained_in_A |
| At4g22990 | At4g11810 | SPX (SYG1/Pho81/XPR1) domain-containing protein                                                                                                                     | SPX (SYG1/Pho81/XPR1) domain-containing protein                                                                                                                     | 7 Uncertain   |
| At4g22960 | At4g11860 | hypothetical protein                                                                                                                                                | expressed protein                                                                                                                                                   | 12 Uncertain  |
| At4g11920 | At4g22910 | WD-40 repeat family protein                                                                                                                                         | WD-40 repeat family protein                                                                                                                                         | 8 Uncertain   |
| At4g11960 | At4g22890 | expressed protein                                                                                                                                                   | expressed protein                                                                                                                                                   | 7 Uncertain   |
| At4g12030 | At4g22840 | bile acid:sodium symporter family protein                                                                                                                           | bile acid:sodium symporter family protein                                                                                                                           | 1 Uncertain   |
| At4g22840 | At4g12030 | bile acid:sodium symporter family protein                                                                                                                           | bile acid:sodium symporter family protein                                                                                                                           | 6 Uncertain   |
| At4g22840 | At4g12030 | bile acid:sodium symporter family protein                                                                                                                           | bile acid:sodium symporter family protein                                                                                                                           | 8 Uncertain   |
| At4g12080 | At4g22770 | DNA-binding family protein                                                                                                                                          | DNA-binding family protein                                                                                                                                          | 4 Uncertain   |
| At4g12430 | At4g22590 | trehalose-6-phosphate phosphatase, putative                                                                                                                         | trehalose-6-phosphate phosphatase, putative                                                                                                                         | 5 Uncertain   |
| At4g12430 | At4g22590 | trehalose-6-phosphate phosphatase, putative                                                                                                                         | trehalose-6-phosphate phosphatase, putative                                                                                                                         | 7 Gained_in_A |
| At4g12430 | At4g22590 | trehalose-6-phosphate phosphatase, putative                                                                                                                         | trehalose-6-phosphate phosphatase, putative                                                                                                                         | 8 Uncertain   |
| At3g09240 | At5g01060 | protein kinase-related                                                                                                                                              | protein kinase family                                                                                                                                               | 4 Uncertain   |
| At3g09820 | At5g03300 | adenosine kinase 1 (ADK1) / adenosine 5'-phosphotransferase 1                                                                                                       | pfkB type carbohydrate kinase protein family                                                                                                                        | 6 Uncertain   |
| At3g09840 | At5g03340 | cell division cycle protein 48 (CDC48A) (CDC48)                                                                                                                     | transitional endoplasmic reticulum ATPase - related                                                                                                                 | 4 Lost_in_B   |
| At3g09840 | At5g03340 | cell division cycle protein 48 (CDC48A) (CDC48)                                                                                                                     | transitional endoplasmic reticulum ATPase - related                                                                                                                 | 5 Lost_in_B   |
| At3g09840 | At5g03340 | cell division cycle protein 48 (CDC48A) (CDC48)                                                                                                                     | transitional endoplasmic reticulum ATPase - related                                                                                                                 | 6 Lost_in_B   |
| At3g09900 | At5g03530 | Ras-related GTP-binding protein, putative                                                                                                                           | Ras family GTP-binding protein                                                                                                                                      | 1 Uncertain   |
| At3g09900 | At5g03530 | Ras-related GTP-binding protein, putative                                                                                                                           | Ras family GTP-binding protein                                                                                                                                      | 11 Uncertain  |
| At5g03530 | At3g09900 | Ras family GTP-binding protein                                                                                                                                      | Ras-related GTP-binding protein, putative                                                                                                                           | 3 Uncertain   |
| At3g09900 | At5g03530 | Ras-related GTP-binding protein, putative                                                                                                                           | Ras family GTP-binding protein                                                                                                                                      | 4 Uncertain   |
| At5g03530 | At3g09900 | Ras family GTP-binding protein                                                                                                                                      | Ras-related GTP-binding protein, putative                                                                                                                           | 5 Uncertain   |
| At3g09900 | At5g03530 | Ras-related GTP-binding protein, putative                                                                                                                           | Ras family GTP-binding protein                                                                                                                                      | 6 Uncertain   |
| At5g03530 | At3g09900 | Ras family GTP-binding protein                                                                                                                                      | Ras-related GTP-binding protein, putative                                                                                                                           | 7 Uncertain   |
| At3g09900 | At5g03530 | Ras-related GTP-binding protein, putative                                                                                                                           | Ras family GTP-binding protein                                                                                                                                      | 8 Uncertain   |
| At3g09900 | At5g03530 | Ras-related GTP-binding protein, putative                                                                                                                           | Ras family GTP-binding protein                                                                                                                                      | 9 Uncertain   |
| At5g03630 | At3g09940 | monodehydroascorbate reductase, putative                                                                                                                            | monodehydroascorbate reductase, putative                                                                                                                            | 7 Gained_in_A |

|           |           |                                                                                                                     |                                                                                                                     |               |
|-----------|-----------|---------------------------------------------------------------------------------------------------------------------|---------------------------------------------------------------------------------------------------------------------|---------------|
| At3g11180 | At5g05600 | oxidoreductase, 2OG-Fe(II) oxygenase family protein                                                                 | oxidoreductase, 2OG-Fe(II) oxygenase family                                                                         | 1 Uncertain   |
| At3g11520 | At5g06150 | cyclin, putative (CYC2)                                                                                             | cyclin (cyc1b)                                                                                                      | 4 Gained_in_A |
| At5g06150 | At3g11520 | cyclin (cyc1b)                                                                                                      | cyclin, putative (CYC2)                                                                                             | 5 Gained_in_A |
| At5g06150 | At3g11520 | cyclin (cyc1b)                                                                                                      | cyclin, putative (CYC2)                                                                                             | 6 Uncertain   |
| At3g11700 | At5g06390 | beta-Ig-H3 domain-containing protein / fasciclin domain-containing protein                                          | expressed protein                                                                                                   | 1 Uncertain   |
| At3g17330 | At1g48110 | expressed protein                                                                                                   | expressed protein                                                                                                   | 4 Uncertain   |
| At3g17510 | At1g48260 | CBL-interacting protein kinase 1 (CIPK1)                                                                            | CBL-interacting protein kinase 17 (CIPK17)                                                                          | 11 Uncertain  |
| At1g48430 | At3g17770 | dihydroxyacetone kinase family protein                                                                              | dihydroxyacetone kinase family protein                                                                              | 2 Uncertain   |
| At1g48470 | At3g17820 | glutamine synthetase, putative                                                                                      | glutamine synthetase (GS1)                                                                                          | 9 Gained_in_A |
| At1g48840 | At3g18350 | expressed protein                                                                                                   | expressed protein                                                                                                   | 8 Uncertain   |
| At3g18610 | At1g48920 | nucleolin, putative                                                                                                 | nucleolin, putative                                                                                                 | 19 Uncertain  |
| At1g48920 | At3g18610 | nucleolin, putative                                                                                                 | nucleolin, putative                                                                                                 | 20 Uncertain  |
| At1g49240 | At3g18780 | actin 8 (ACT8)                                                                                                      | actin 2 (ACT2)                                                                                                      | 1 Gained_in_A |
| At1g49300 | At3g18820 | Ras-related GTP-binding protein, putative                                                                           | Ras-related GTP-binding protein, putative                                                                           | 2 Uncertain   |
| At1g49580 | At3g19100 | calcium-dependent protein kinase, putative / CDPK, putative                                                         | calcium-dependent protein kinase, putative / CDPK, putative                                                         | 5 Uncertain   |
| At3g19310 | At1g49740 | expressed protein                                                                                                   | expressed protein                                                                                                   | 2 Uncertain   |
| At1g50050 | At3g19690 | pathogenesis-related protein, putative                                                                              | pathogenesis-related protein, putative                                                                              | 1 Uncertain   |
| At1g51130 | At3g20760 | expressed protein                                                                                                   | hypothetical protein                                                                                                | 4 Uncertain   |
| At3g20840 | At1g51190 | ovule development protein, putative                                                                                 | ovule development protein, putative                                                                                 | 7 Lost_in_B   |
| At3g21090 | At1g51500 | ABC transporter family protein                                                                                      | ABC transporter family protein                                                                                      | 6 Uncertain   |
| At3g21230 | At1g51680 | 4-coumarate--CoA ligase, putative / 4-coumaroyl-CoA synthase, putative (4CL)                                        | 4-coumarate--CoA ligase 1 / 4-coumaroyl-CoA synthase 1 (4CL1)                                                       | 2 Uncertain   |
| At1g51710 | At3g21280 | ubiquitin-specific protease 6, putative (UBP6)                                                                      | ubiquitin-specific protease 7, putative (UBP7)                                                                      | 16 Uncertain  |
| At3g21340 | At1g51800 | leucine-rich repeat protein kinase, putative                                                                        | leucine-rich repeat protein kinase, putative                                                                        | 13 Uncertain  |
| At1g51800 | At3g21340 | leucine-rich repeat protein kinase, putative                                                                        | leucine-rich repeat protein kinase, putative                                                                        | 2 Uncertain   |
| At1g66200 | At5g37600 | glutamine synthetase, putative                                                                                      | glutamate--ammonia ligase                                                                                           | 5 Gained_in_A |
| At1g66880 | At5g38210 | serine/threonine protein kinase family protein                                                                      | serine/threonine protein kinase family                                                                              | 3 Uncertain   |
| At1g66880 | At5g38210 | serine/threonine protein kinase family protein                                                                      | serine/threonine protein kinase family                                                                              | 8 Lost_in_B   |
| At5g38450 | At1g67110 | cytochrome P450 family                                                                                              | cytochrome P450, putative                                                                                           | 2 Lost_in_B   |
| At3g01350 | At5g14940 | proton-dependent oligopeptide transport (POT) family protein                                                        | oligopeptide transporter -related protein                                                                           | 1 Uncertain   |
| At3g01540 | At5g14610 | DEAD box RNA helicase (DRH1)                                                                                        | DEAD box RNA helicase, putative                                                                                     | 10 Uncertain  |
| At5g14420 | At3g01650 | copine-related                                                                                                      | copine-related                                                                                                      | 10 Uncertain  |
| At3g01650 | At5g14420 | copine-related                                                                                                      | copine-related                                                                                                      | 3 Uncertain   |
| At5g14060 | At3g02020 | aspartate kinase, lysine-sensitive                                                                                  | aspartate kinase, lysine-sensitive, putative                                                                        | 3 Uncertain   |
| At3g02460 | At5g15930 | plant adhesion molecule, putative                                                                                   | plant adhesion molecule 1 (PAM1)                                                                                    | 6 Uncertain   |
| At5g16130 | At3g02560 | 40S ribosomal protein S7 (RPS7C)                                                                                    | 40S ribosomal protein S7 (RPS7B)                                                                                    | 3 Lost_in_B   |
| At3g02900 | At5g16660 | expressed protein                                                                                                   | protein; similar to unknown protein (qb AAF26969.1) -related                                                        | 4 Uncertain   |
| At3g02980 | At5g16800 | GCN5-related N-acetyltransferase (GNAT) family protein                                                              | GCN5-related N-acetyltransferase (GNAT) family                                                                      | 5 Uncertain   |
| At3g03090 | At5g17010 | sugar transporter family protein                                                                                    | sugar transporter family                                                                                            | 1 Uncertain   |
| At5g17010 | At3g03090 | sugar transporter family                                                                                            | sugar transporter family protein                                                                                    | 2 Uncertain   |
| At5g17310 | At3g03250 | UDP-glucose pyrophosphorylase                                                                                       | UTP--glucose-1-phosphate uridylyltransferase, putative / UDP-glucose pyrophosphorylase, putative / UGPase, putative | 11 Uncertain  |
| At3g03250 | At5g17310 | UTP--glucose-1-phosphate uridylyltransferase, putative / UDP-glucose pyrophosphorylase, putative / UGPase, putative | UDP-glucose pyrophosphorylase                                                                                       | 18 Uncertain  |
| At3g03340 | At5g17440 | LUC7 N_terminus domain-containing protein                                                                           | expressed protein                                                                                                   | 11 Uncertain  |
| At5g17440 | At3g03340 | expressed protein                                                                                                   | LUC7 N_terminus domain-containing protein                                                                           | 12 Uncertain  |
| At5g17570 | At3g03500 | expressed protein                                                                                                   | tatD-related deoxyribonuclease family protein                                                                       | 4 Uncertain   |

|           |           |                                                                                       |                                                                                                                                                                                                |                |
|-----------|-----------|---------------------------------------------------------------------------------------|------------------------------------------------------------------------------------------------------------------------------------------------------------------------------------------------|----------------|
| At5g17920 | At3g03780 | 5-methyltetrahydropteroyltriglutamate-- homocysteine S-methyltransferase              | 5-methyltetrahydropteroyltriglutamate-- homocysteine methyltransferase, putative / vitamin-B12-independent methionine synthase, putative / cobalamin-independent methionine synthase, putative | 9 Uncertain    |
| At5g18240 | At3g04030 | transfactor-related protein                                                           | myb family transcription factor                                                                                                                                                                | 4 Uncertain    |
| At1g13130 | At3g26130 | glycosyl hydrolase family 5 protein / cellulase family protein                        | glycosyl hydrolase family 5 protein / cellulase family protein                                                                                                                                 | 2 Uncertain    |
| At1g13210 | At3g25610 | haloacid dehalogenase-like hydrolase family protein                                   | haloacid dehalogenase-like hydrolase family protein                                                                                                                                            | 7 Uncertain    |
| At1g13320 | At3g25800 | serine/threonine protein phosphatase 2A (PP2A) 65 kDa regulatory subunit, putative    | serine/threonine protein phosphatase 2A (PP2A) 65 KDa regulatory subunit A                                                                                                                     | 1 Uncertain    |
| At3g25840 | At1g13350 | protein kinase family protein                                                         | protein kinase family protein                                                                                                                                                                  | 12 Gained_in_A |
| At3g25840 | At1g13350 | protein kinase family protein                                                         | protein kinase family protein                                                                                                                                                                  | 13 Uncertain   |
| At1g32380 | At2g35390 | ribose-phosphate pyrophosphokinase 2 / phosphoribosyl diphosphate synthetase 2 (PRS2) | ribose-phosphate pyrophosphokinase 1 / phosphoribosyl diphosphate synthetase 1 (PRSI)                                                                                                          | 2 Uncertain    |

\* Introns are numbered along the pairwise sequence alignment
